# Supplementary material for: Dual-targeting 5-nitroimidazole ethers eradicate H. pylori by induction of stress and disabling its adaptive response
Source: Research Square preprint supplement (doi:10.21203/rs.3.rs-4497718/v1), 2025-08-07
Supplement: Supplementary file 1 [file 1c4008a2e1e119e196088cfa.docx]

Supplementary Information for

**Dual-targeting 5-nitroimidazole ethers eradicate H. pylori by induction of stress and disabling its adaptive response**

Michaela K. Fiedler1, Marianne Pandler1, Ruolan Gong2, Sonja Fuchs2, Katharina Rox3,4, Verena Friedrich2, Dietmar Pfeiffer2, Dharmesh Singh2, Till Reinhardt1, Cora Mibus2, Matthias Huber5,6, Corinna Hess5,6, Raquel Mejías-Luque2, Markus Gerhard2, Michael Groll7, Stephan A. Sieber1*

Corresponding author: stephan.sieber@tum.de

**The file includes:**

Supporting Figures S1 to S25

Supporting Tables S1 to S5

Supplementary Structural Information SSI1

Material and Methods

Figures S26

Tables S6 to S18

NMR Spectra

Figures S27 to S42

References

**Table of Content**

[Supporting Figures 4](#_Toc201836468)

[Supplemental Tables 23](#_Toc201836469)

[Supporting Structural Information 27](#_Toc201836470)

[Material and Methods 29](#_Toc201836471)

[1.1 General Remarks for Synthesis 29](#_Toc201836472)

[1.2 Synthesis 30](#_Toc201836473)

[1.3 Redox potential measurements 39](#_Toc201836474)

[1.4 Media, Reagents and Buffers for Bacterial Growth 39](#_Toc201836475)

[1.5 Bacterial Strains and Plasmids 39](#_Toc201836476)

[1.6 Cell culture 41](#_Toc201836477)

[1.7 Cloning 41](#_Toc201836478)

[1.8 Gel-based Activity-based Protein Profiling (ABPP) 45](#_Toc201836479)

[1.9 SDS-Page 46](#_Toc201836480)

[1.10 MS-based ABPP – *In Situ* Labeling 46](#_Toc201836481)

[1.11 Full Proteome Analysis 48](#_Toc201836482)

[1.12 Binding Site Identification isoDTB Workflow 50](#_Toc201836483)

[1.13 Intracellular EC50 Determination in *H. pylori* 54](#_Toc201836484)

[1.14 Recombinant Protein Overexpression from *E. coli* 54](#_Toc201836485)

[1.15 Purification of recombinantly expressed proteins 55](#_Toc201836486)

[1.16 Intact Protein MS 58](#_Toc201836487)

[1.17 Recombinant Protein Labeling of HpTpx from *E. coli* 59](#_Toc201836488)

[1.18 Analytical Protein Expression and *in situ* Labeling of HpTpx or Mutants in *E. coli* 60](#_Toc201836489)

[1.19 Crystallography 60](#_Toc201836490)

[1.20 Minimal Inhibitory Concentration Assay (MIC Assay) 63](#_Toc201836491)

[1.21 Resistance development assay 63](#_Toc201836492)

[1.22 ATPase activity assay 64](#_Toc201836493)

[1.23 Peroxidase Assay 64](#_Toc201836494)

[1.24 DNA-based Antioxidant Activity Assay 65](#_Toc201836495)

[1.25 MTT Assay 65](#_Toc201836496)

[1.26 Plasma Stability Assay 65](#_Toc201836497)

[1.27 AGS Adhesion Assay with *H. pylori* 26695 66](#_Toc201836498)

[1.28 *In vitro* ADME studies 66](#_Toc201836499)

[1.29 Pharmacokinetic (PK) studies 67](#_Toc201836500)

[1.30 HPLC-MS/MS Analysis for ADME and PK Studies 68](#_Toc201836501)

[1.31 *In vivo* Efficacy Studies in Murine Model 69](#_Toc201836502)

[1.32 Microbiome Analysis 70](#_Toc201836503)

[NMR Spectra 72](#_Toc201836504)

# Supporting Figures


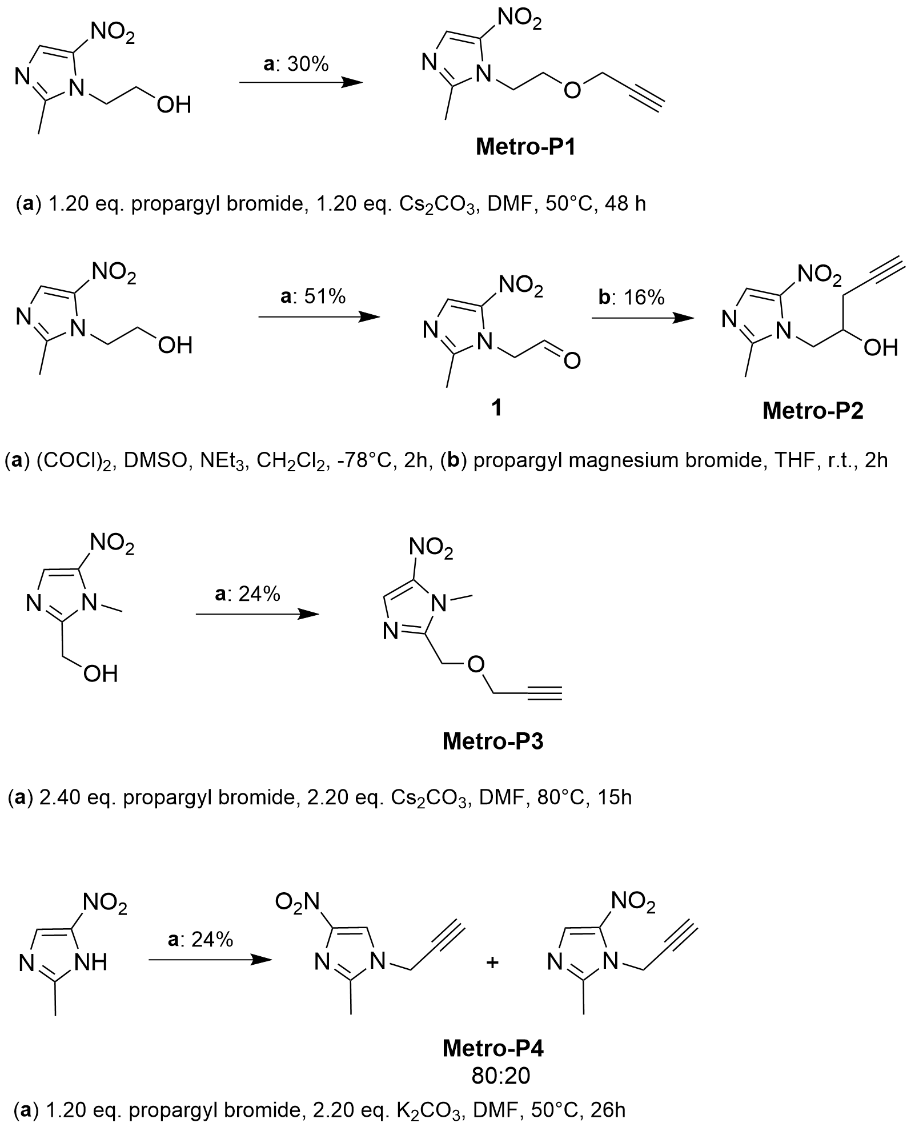


**Figure S 1:** Synthesis routes and reaction conditions for **Metro-P1, Metro-P2, Metro-P3** and **Metro‑P4**.

**
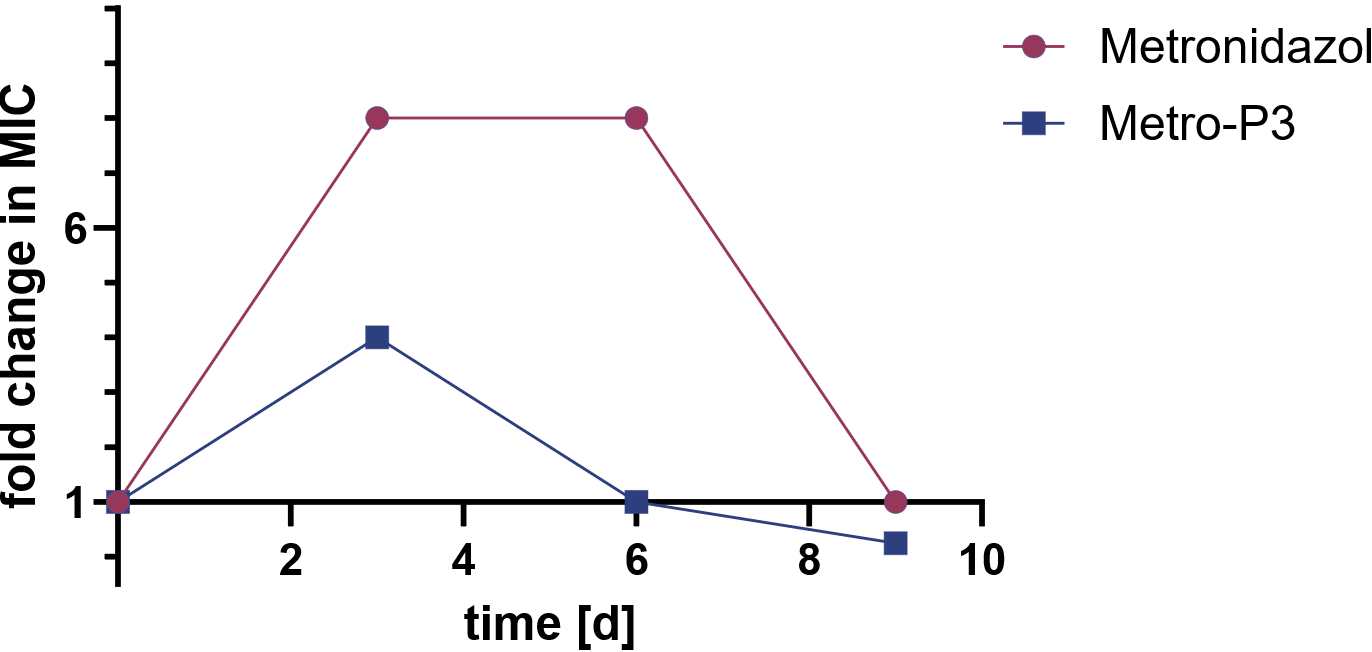
**

**Figure S 2:** Resistance development during serial passaging in the presence of sub-MIC concentrations of antimicrobials. Bacterial growth was severely impaired after 6 days (H. pylori transform into a coccoid form under stress which is difficult to cultivate).


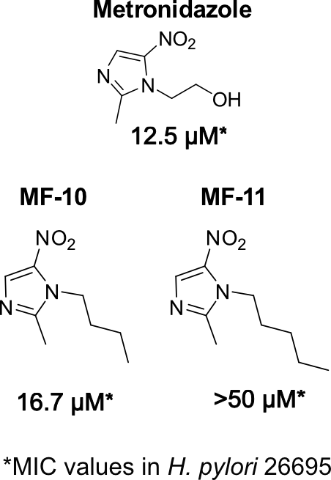


**Figure S 3:** Overview of synthesized aliphatic nitroimidazole derivatives and respective MIC values in H. pylori 26695.


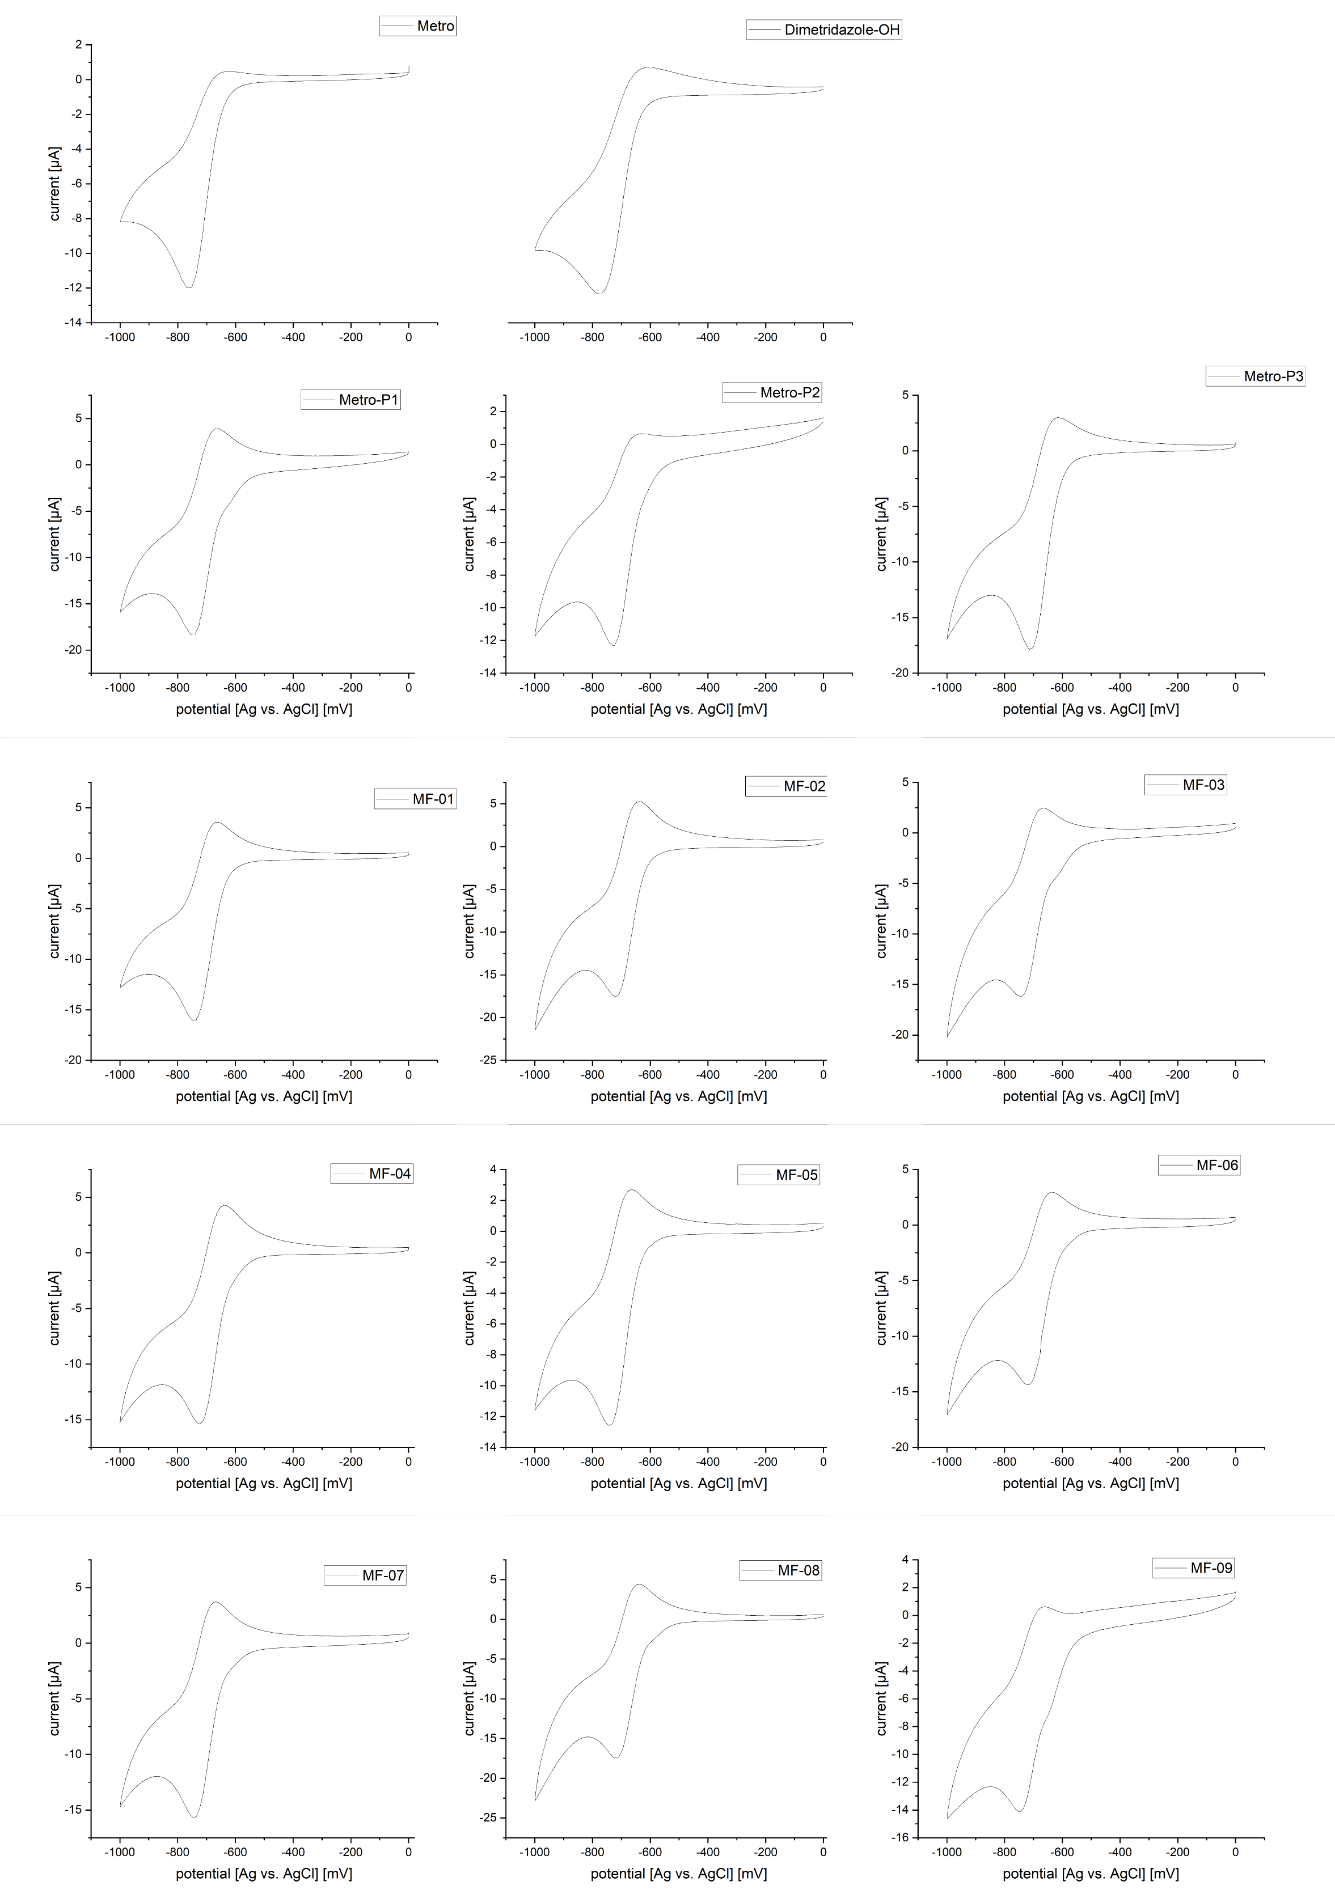


**Figure S 4:** Cyclic voltammetry (CV) measurements of 5-nitroimidazole compounds. Depicted is the measurement within the respective potential region encompassing the first reductive event from 0 mV to 1000 mV against potential [mV vs Ag/AgCl] for each compound. Generally, the first scan cycle is shown. Cyclic voltammograms were measured and are shown against E(Ag/AgCl). Redox potentials were reported referenced to the normal hydrogen electrode (NHE): E(Ag/AgCl;1 M KCl) = 236 mV vs NHE.

**Figure S 5**: Growth curve H. pylori 26695 under microaerophilic conditions at 37°C in a culture volume of 50 mL BHI + 10% FCS medium inoculated with 1:100 H. pylori overnight culture. OD600 was normalized to cultivation media (BHI + 10% FCS). Data represents mean values ±s.d of biological replicates (n = 3).


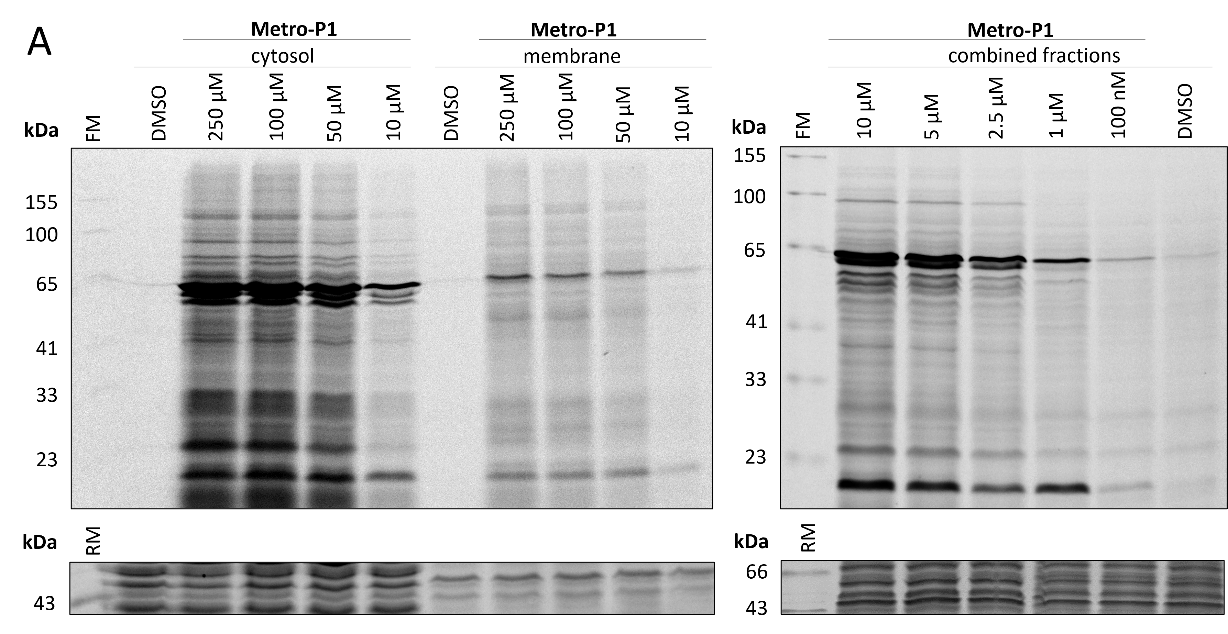

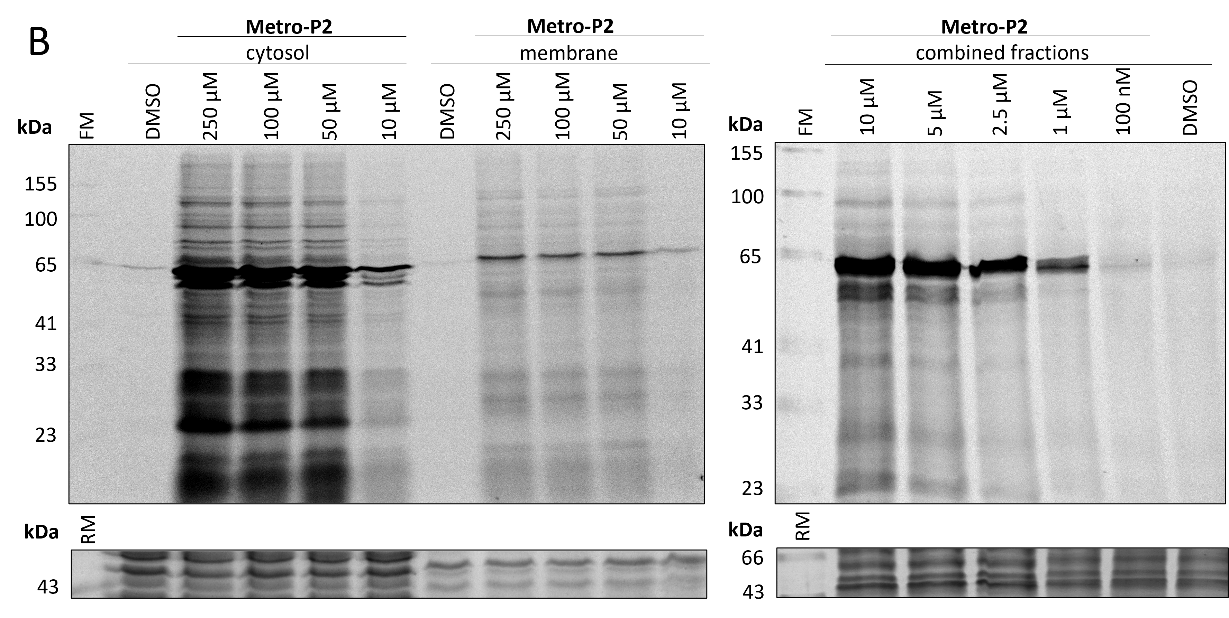

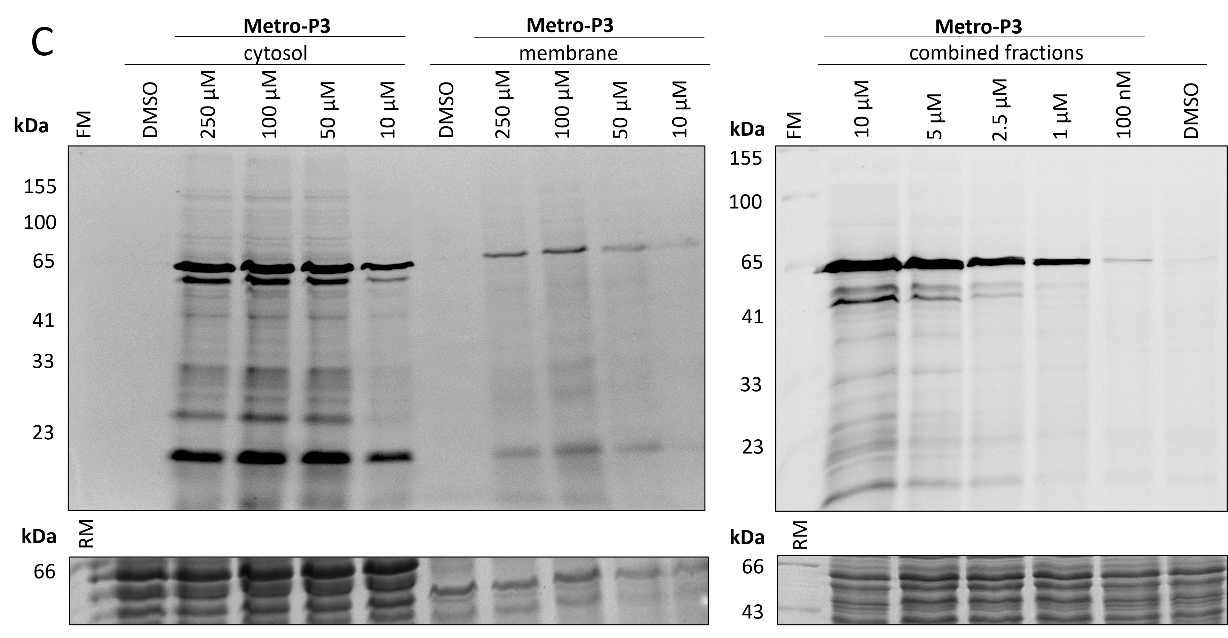


**Figure S 6**: Gel-based fluorescent ABPP labeling of **Metro-P1** (**A**), **Metro-P2** (**B**)and **Metro-P3** (**C**) in H. pylori 26695 (37 °C, 140 rpm, 2 h, microaerophilic conditions). Top: Fluorescence gel after Click reaction to rhodamine azide. Bottom: Coomassie-staining as loading control). FM = fluorescent marker, RM = Roti marker. Click-Chemistry was performed separately for cytosol and membrane fraction of cell lysate (left) or combined (right).


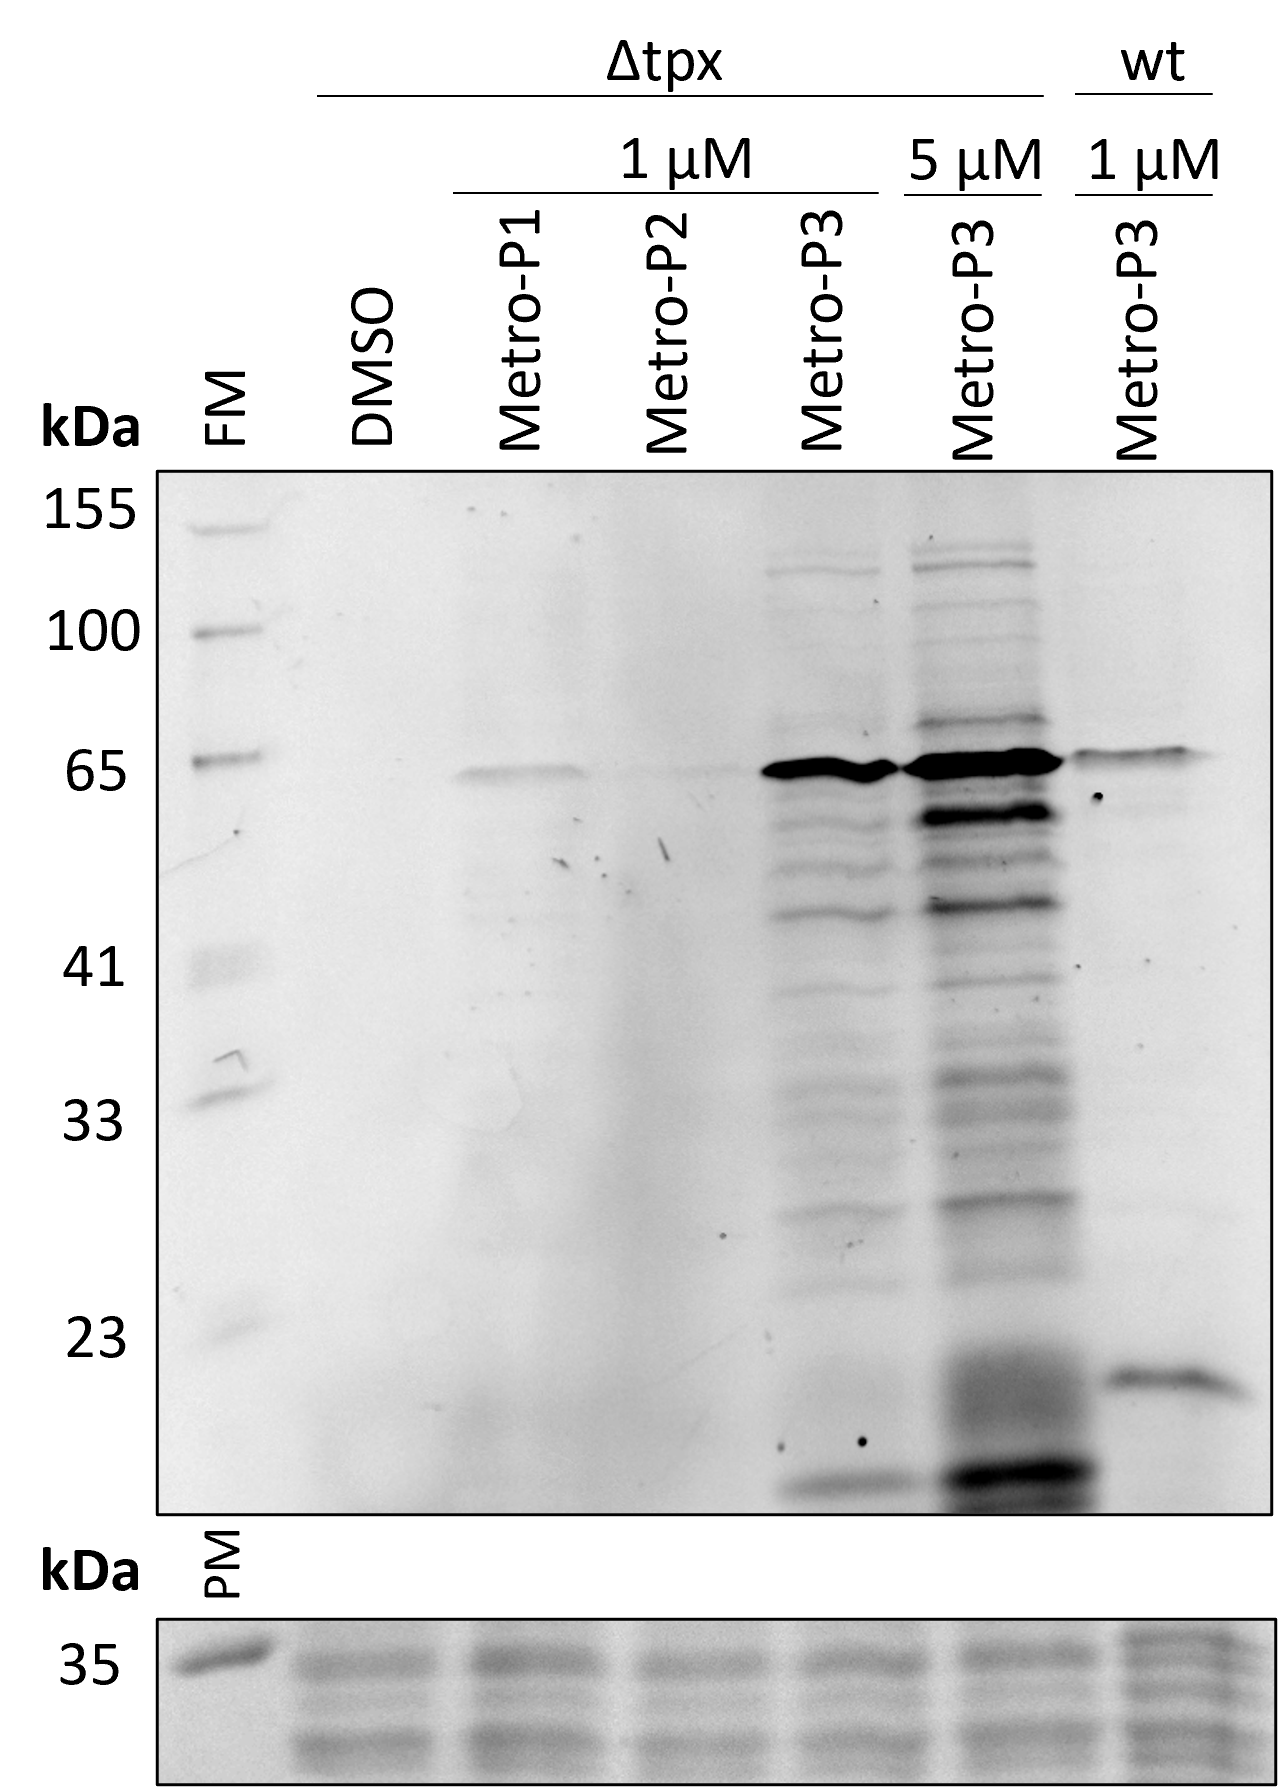


**Figure S 7**:Gel-based fluorescent ABPP labeling of **Metro-P1**, **Metro-P2** and **Metro-P3** in H. pylori 26695 Δtpx and wt strain. Top: Fluorescence gel after Click reaction to rhodamine azide. Bottom: Coomassie-staining as loading control. FM = fluorescent marker, PM = PeqGold marker.


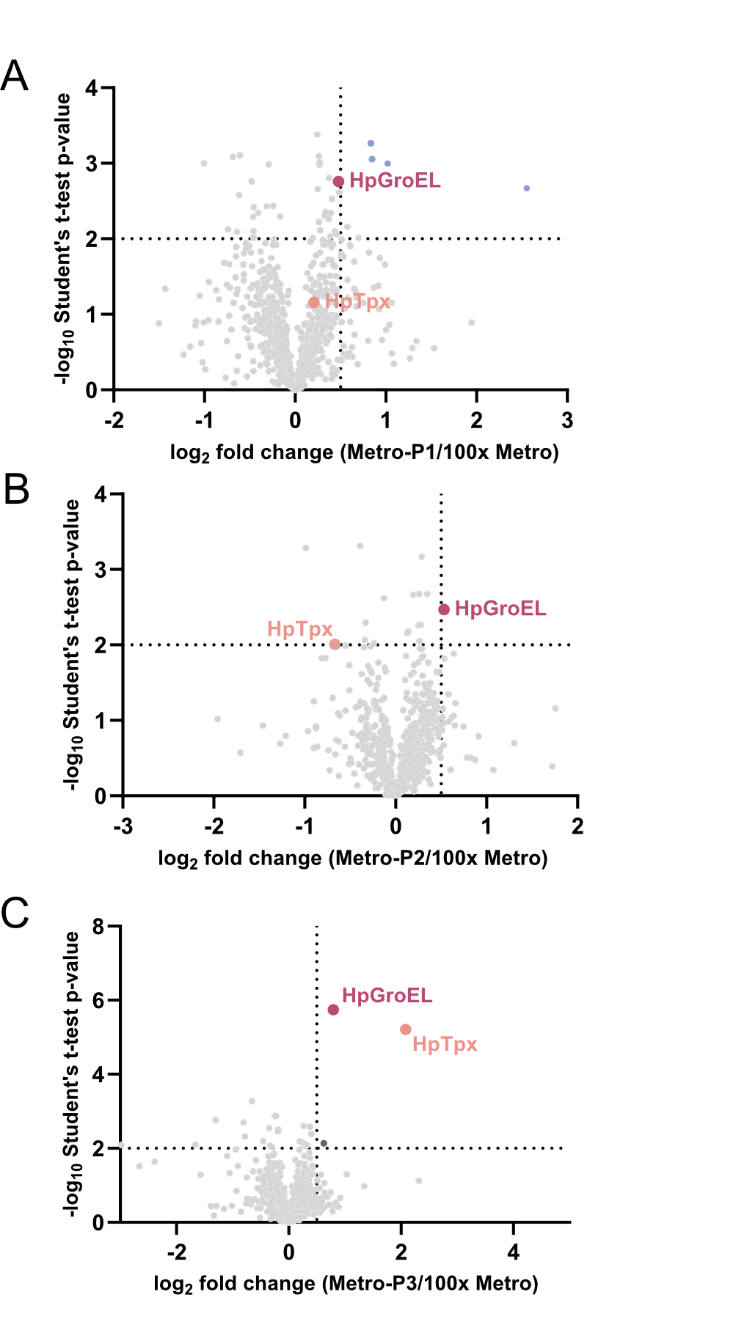


**Figure S 8**: Resulting volcano plots of MS-based competitive labeling experiments in H. pylori 26695 with **Metro-P1** (**A**), **Metro-P2** (**B**) and **Metro-P3** (**C**). Preincubation with metronidazole (100 µM, 100× excess) as competitor for 2 h (37 °C, 140 rpm, microaerophilic cond.) and subsequent incubation with probe (1 µM, 37 °C, 140 rpm, 2 h, microaerophilic cond.). Cut-off lines for p-values < 0.01 and log2 fold changes >0.5. HpGroEL and HpTpx shown as red and orange dots in all plots. Experiment was performed in biological triplicates (n = 3). Two-tailed Student’s t-test was performed for statistical evaluation.


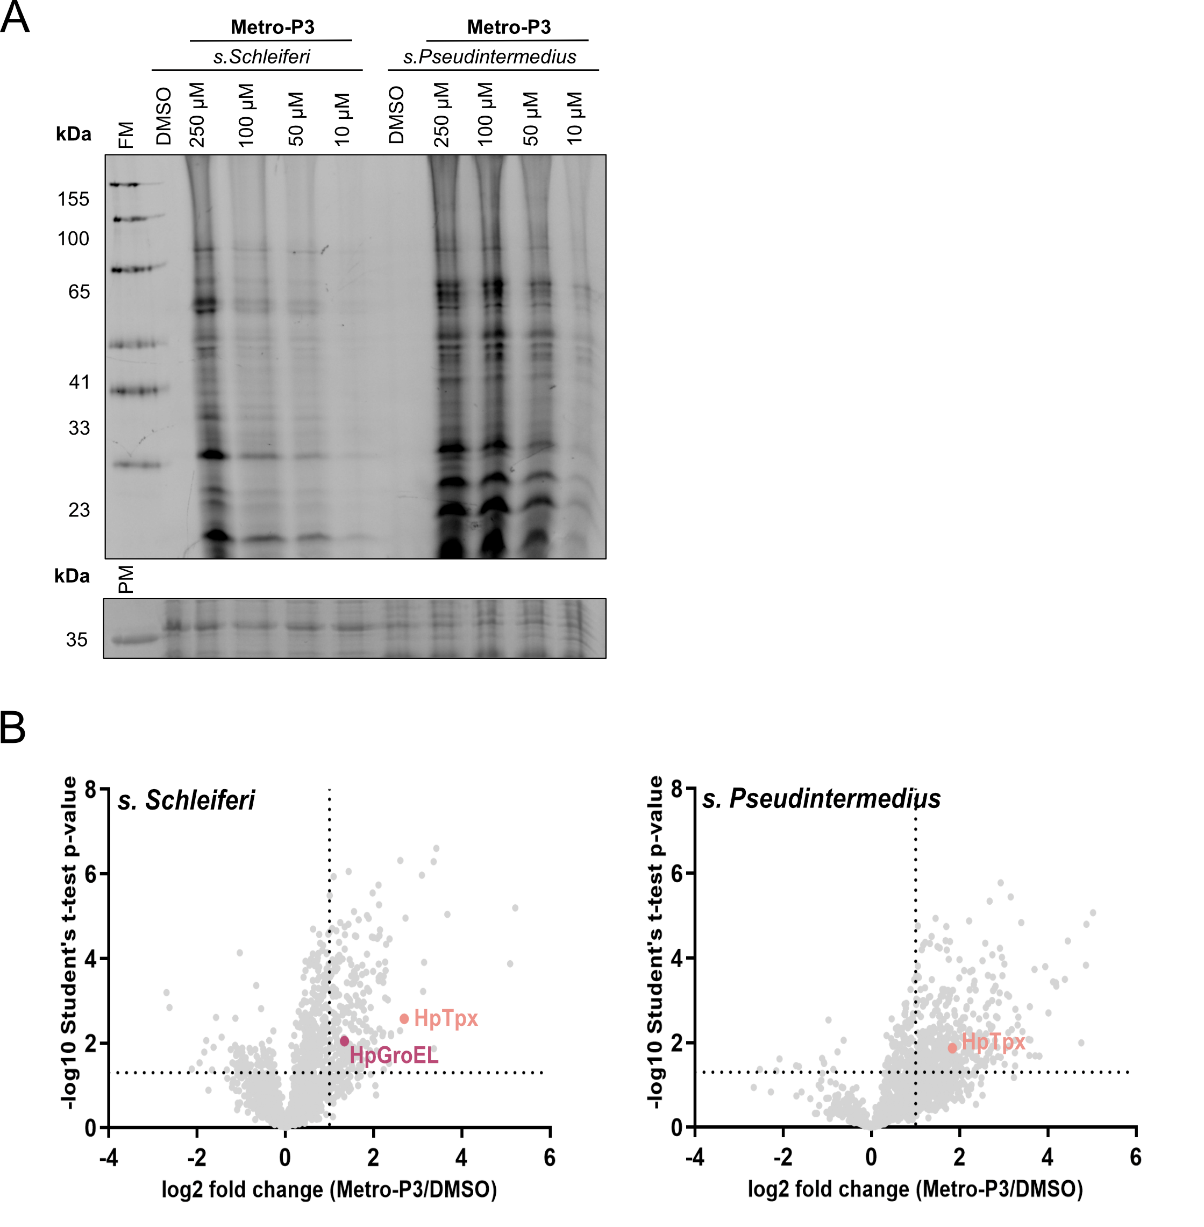


**Figure S 9**: Labeling experiments of **Metro-P3** in S. schleiferi and S. pseudintermedius. (A) Gel-based fluorescent ABPP labeling. Top: Fluorescence gel after Click reaction to rhodamine azide. Bottom: Coomassie-staining as loading control. FM = fluorescent marker, PM = PeqGold marker. (B) Resulting volcano plots of MS-based labelling. Incubation with probe (10 µM, 37 °C, 0 rpm, 2 h, anaerobic cond.). Cut-off lines for p-values < 0.01 and log2 fold changes >0.5. HpGroEL and HpTpx shown as red and orange dots in all plots. Experiment was performed in biological quadruplicates (n = 4). Two-tailed Student’s t-test was performed for statistical evaluation.


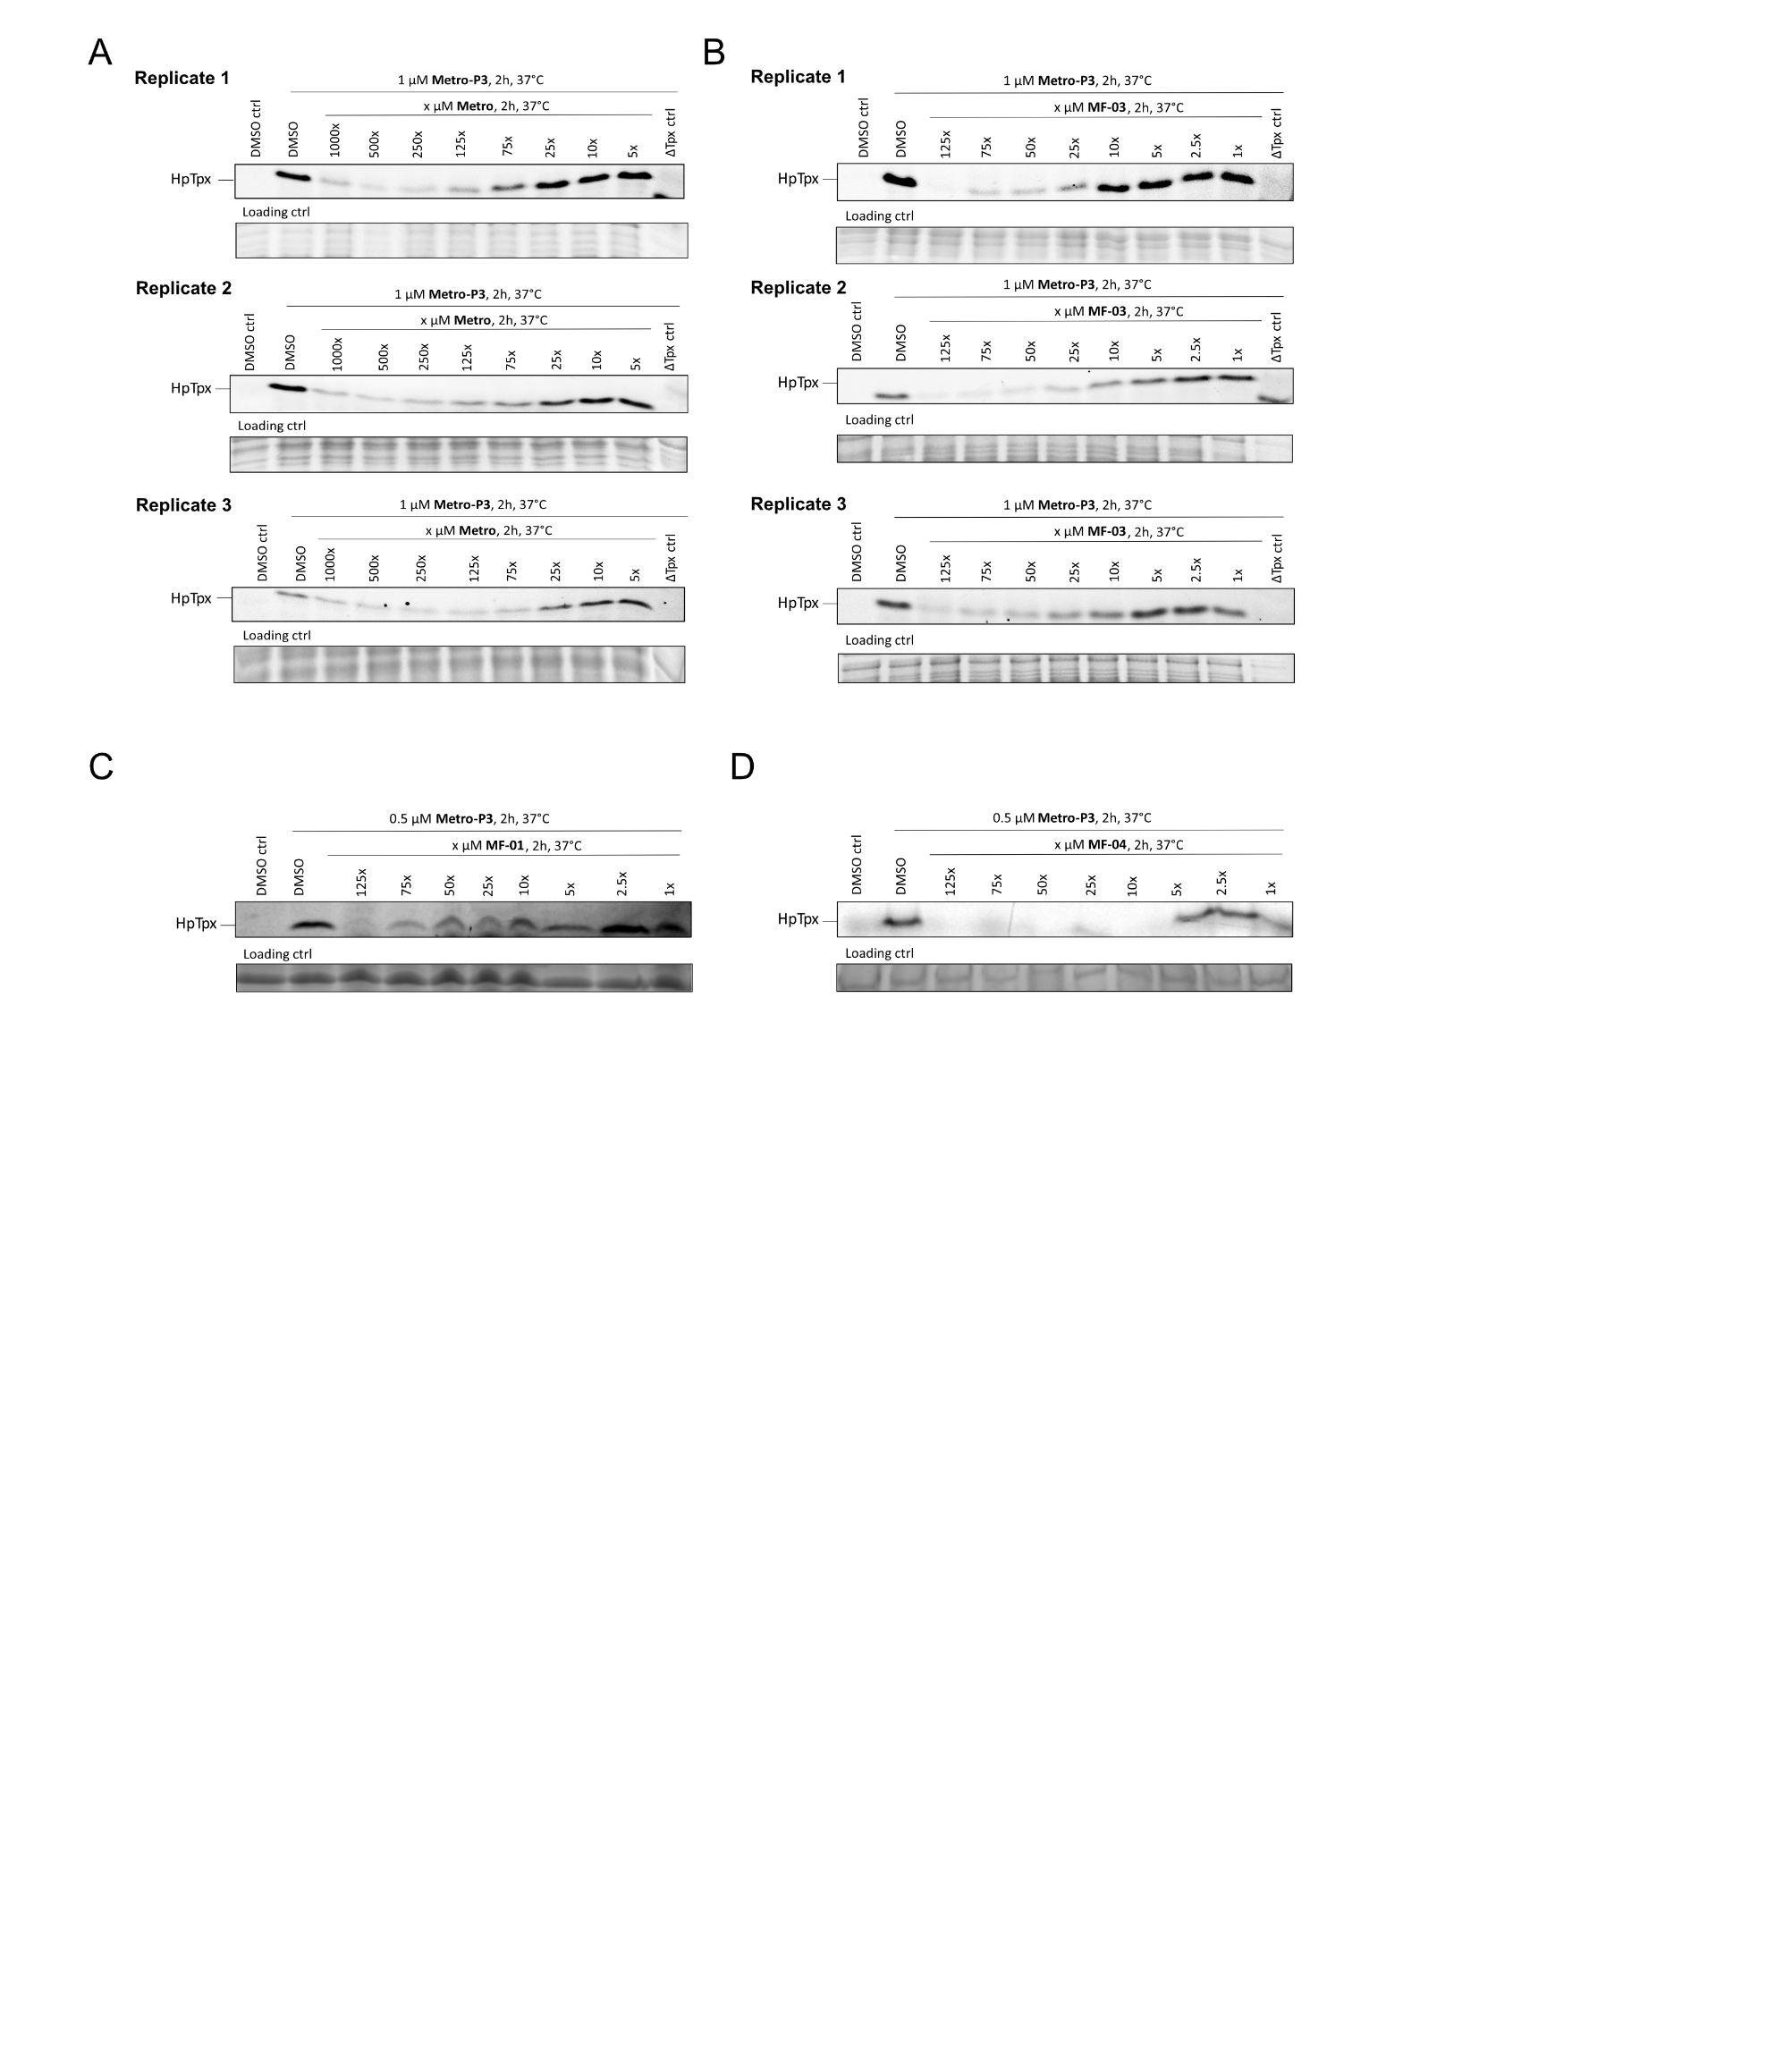


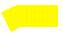

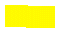


**Figure S 10**: Biological triplicates of gel-based competitive ABPP labeling studies in *H. pylori 26695 (*and ∆*tpx* as control) for apparent EC50 determination of HpTpx: Preincubation with different metronidazole (**A**), **MF-03** (**B**), **MF-01** (**C**) or **MF-04** (**D**)concentrations(37 °C, 140 rpm, 2 h, microaerophilic cond.) and subsequent incubation with probe (**Metro-P3**)(1 or 0.5 µM, 37 °C, 140 rpm, 2 h, microaerophilic cond.). Top: Fluorescence detection of SDS gel after *Click*-reaction with rhodamine azide. Bottom: Coomassie-staining of SDS gel (loading control).


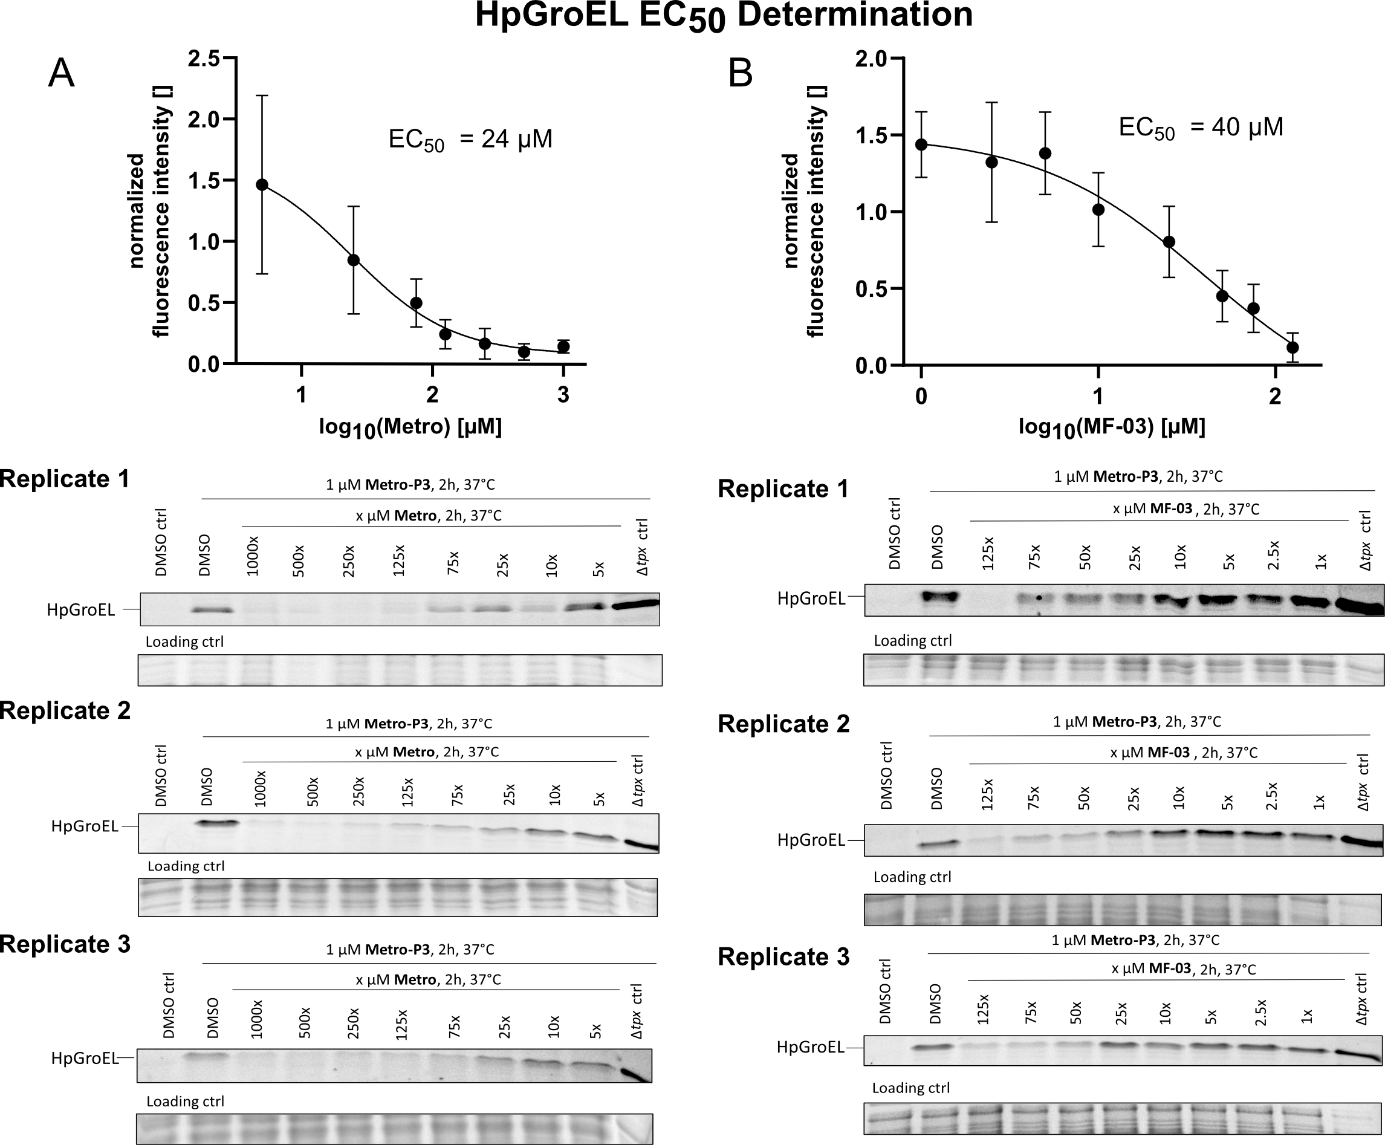


**Figure S 11**: Gel-based in situ competitive labeling in H. pylori 26695 for apparent EC50 value determination of HpGroEL. Pre-treatment of H. pylori 26695 with various Metronidazole (1× – 1000×, **A**) or **MF-03** (1× – 125×, **B**) concentrations for 2 h prior to the incubation with **Metro-P3** (1 µM, 2 h). Bacteria were harvested, lysed, clicked to rhodamine azide and fluorescent bands were visualized by SDS-Page. Top: fluorescence, bottom: Coomassie staining as loading control. Band intensities of HpGroEL were quantified with ImageJ[1](#_ENREF_1). Values were normalized to band intensities without addition of competitor and DMSO control was subtracted as baseline. Data shown represent mean values ± s.d. of 3 biological replicates (n = 3). Apparent relative EC50 values were determined using non-linear regression (log(inhibitor) vs. response - Variable slope (four parameters)).


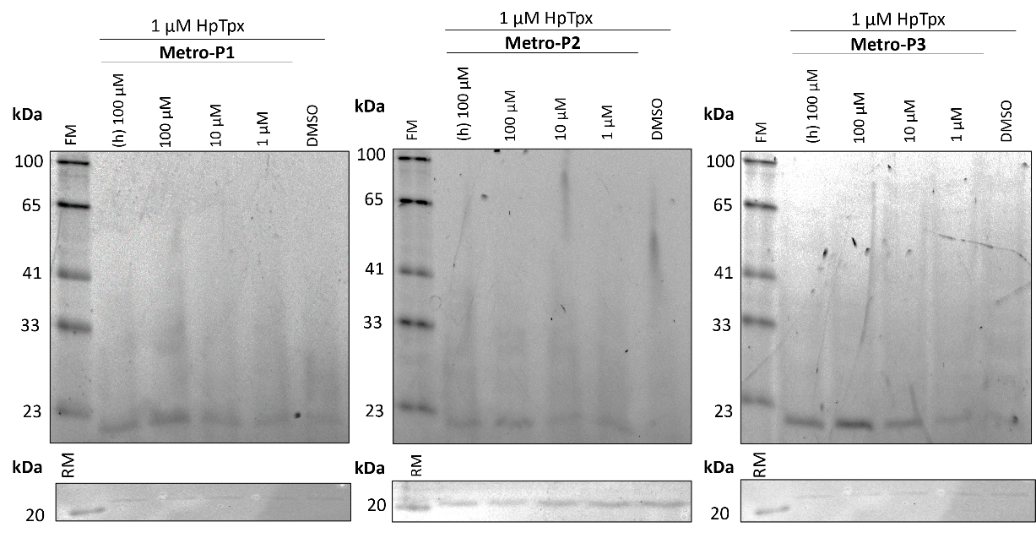


**Figure S 12:** Gel-based fluorescent labeling of recombinantly expressed and purified HpTpx **in vitro**. HpTpx (1 µM) was incubated with varying concentrations of **Metro-P1** (left), **Metro-P2** (center), **Metro-P3** (right) for 1 h at 37°C (200 rpm, aerobic) prior to Click reaction and SDS Page. Heat shock (h) was performed at 95°C for 20 min before incubation with probe. Slight background labeling observed for all conditions including heat shock and DMSO control. Top: fluorescence gel, bottom: Coomassie gel as loading control. FM= fluorescent marker, RM = Roti Marker.


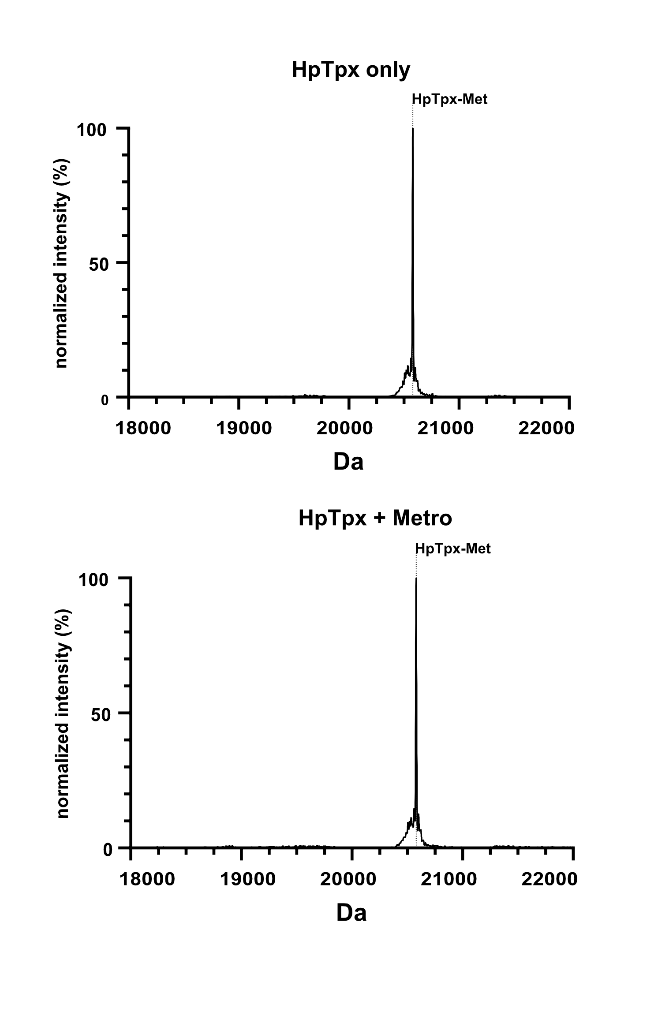


**Figure S 13:** Intact Protein MS (IP-MS) of recombinant labeling of HpTpx with Metronidazole (or **Metro-P1**, **Metro-P2**, **Metro-P3**) in vitro. Recombinantly expressed HpTpx (10 µM) was incubated with 50 µM compound for 1 h at 37°C before IP-MS analysis. Protein mass for HpTpx was found to be 20 580 Da corresponding to Strep-tagged HpTpx without start-methionine (HpTpx-Met). No mass shift was observed. Found mass with addition of compound: 20 580 Da (HpTpx-Met). Result is exemplarily shown for incubation with Metronidazole, identical results were observed for **Metro-P1**, **Metro-P2** and **Metro-P3** (data not shown).


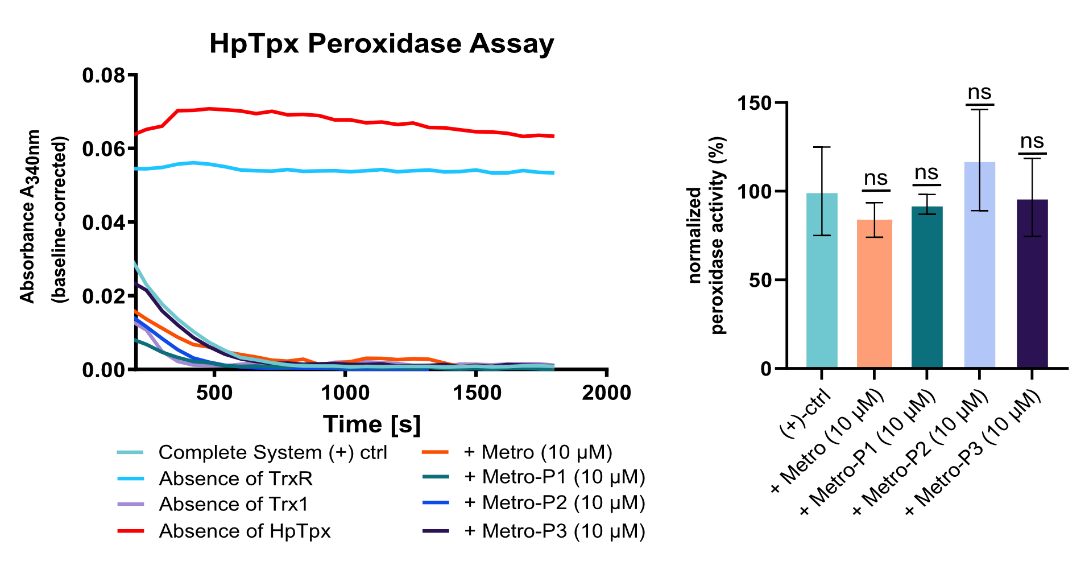


**Figure S 14**: HpTpx peroxidase assay with and without pre-incubation (30 min, r.t.) of HpTpx with Metronidazole (Metro), **Metro-P1**, **Metro-P2** and **Metro-P3** (10 µM). Absorbance at 340 nm was measured over time and baseline-corrected to reaction buffer (left). Normalized activity of HpTpx w or w/o addition of compound. was determined from initial slopes via simple linear regression of time-dependent absorbance measurements and normalized to the Complete system (+) ctrl (HpTpx activity 100%). Bar chart represents the mean ± SEM. of three technical replicates per condition (right). Two-tailed Student’s t test was performed for statistical evaluation. n.s. = not significant, p-value > 0.05.


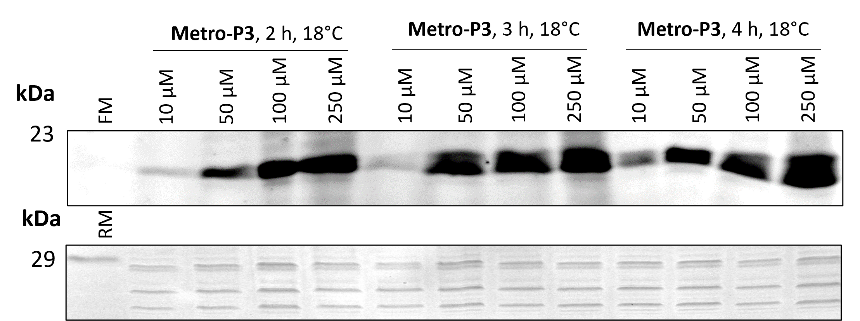


**Figure S 15**: Test gel expressions of HpTpx in E. coli to find suitable conditions to express enzymes with increasing degree of **Metro** or **Metro-P3** modification. After protein expression, bacteria were harvested, lysed and clicked to rhodamine azide prior to fluorescence SDS-Page. Top: fluorescence gel with band belonging to HpTpx. Bottom: coomassie gel as loading control. FM = fluorescent marker, RM = Roti marker.


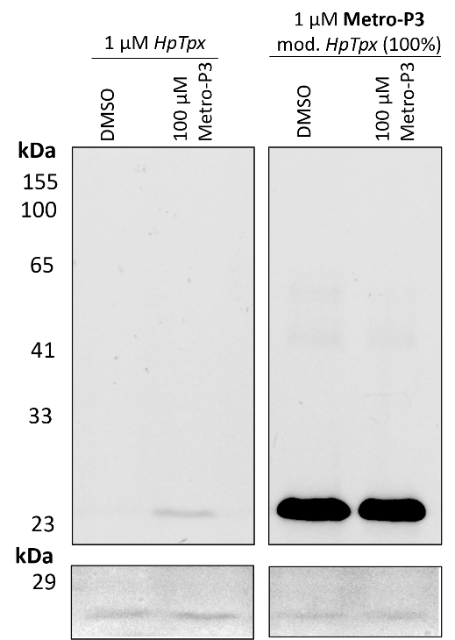


**Figure S 16:** Comparison of gel-based fluorescent labeling of recombinantly expressed and purified HpTpx (left) or with addition of **Metro-P3** during protein overexpression (1 mM, 18 h, o/n, right). HpTpx (1 µM) or modified HpTpx (100% **Metro-P3**) were incubated with **Metro-P3** (100 µM) or DMSO for 1 h at 37°C (200 rpm, aerobic) prior to Click chemistry and SDS Page. Top: fluorescence gel, bottom: coomassie gel as loading control.


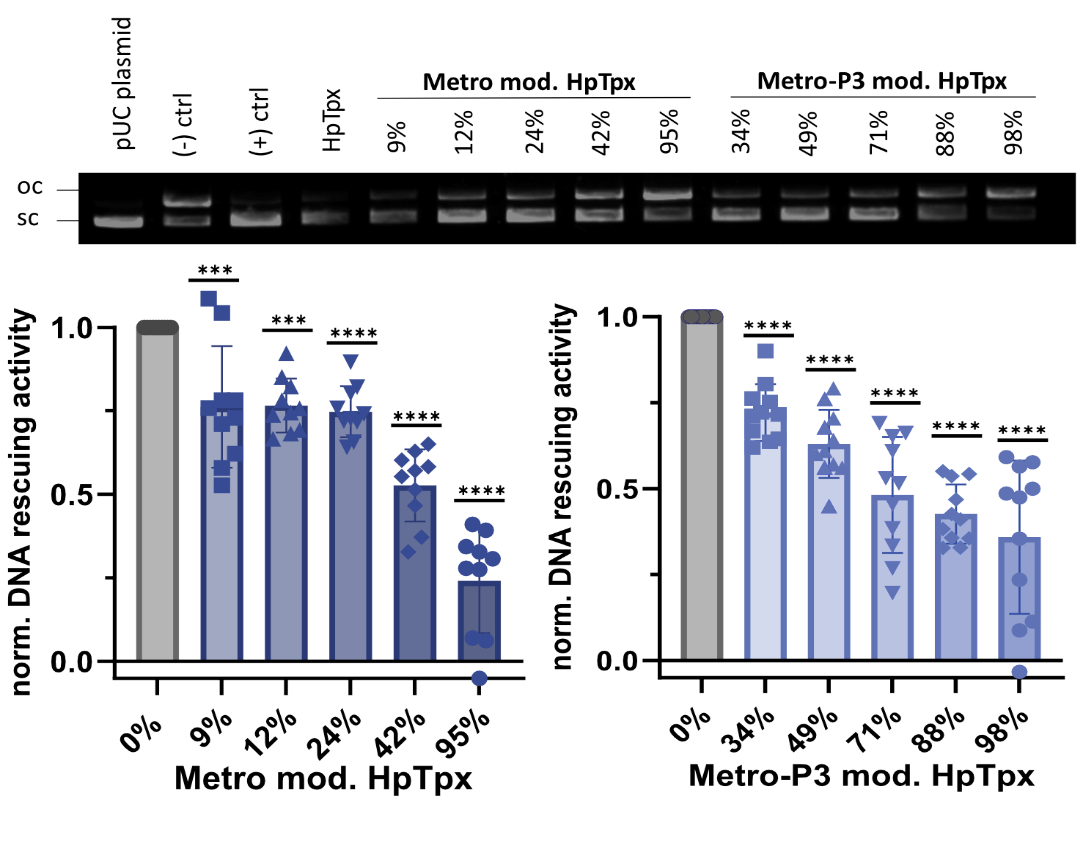


**Figure S 17:** DNA-based antioxidant activity assay of HpTpx. Top: Agarose gel of one biological replicate shown for evaluation of HpTpx ability to circumvent DNA damage. oc = open circular; sc = supercoiled form of DNA. Addition of EDTA during reaction served as positive control. Bottom: DNA rescuing activity was determined as the ratio of sc/oc form of DNA. Band intensities were quantified by *ImageJ*[*1*](#_ENREF_1). Obtained ratios were normalized to positive control ratio (100% activity) and negative control (0% activity) was subtracted as baseline. Graphs represent mean values ± s.d. of 10-12 biologically independent experiments (**Metro**: n = 10, **Metro-P3**: n = 12). Statistical significance was determined by ordinary one-way ANOVA with multiple comparisons (no correction) to control column (0%). p-values: >0.05 (ns), < 0.05 (*), < 0.01 (**), < 0.001 (***), < 0.0001 (****).


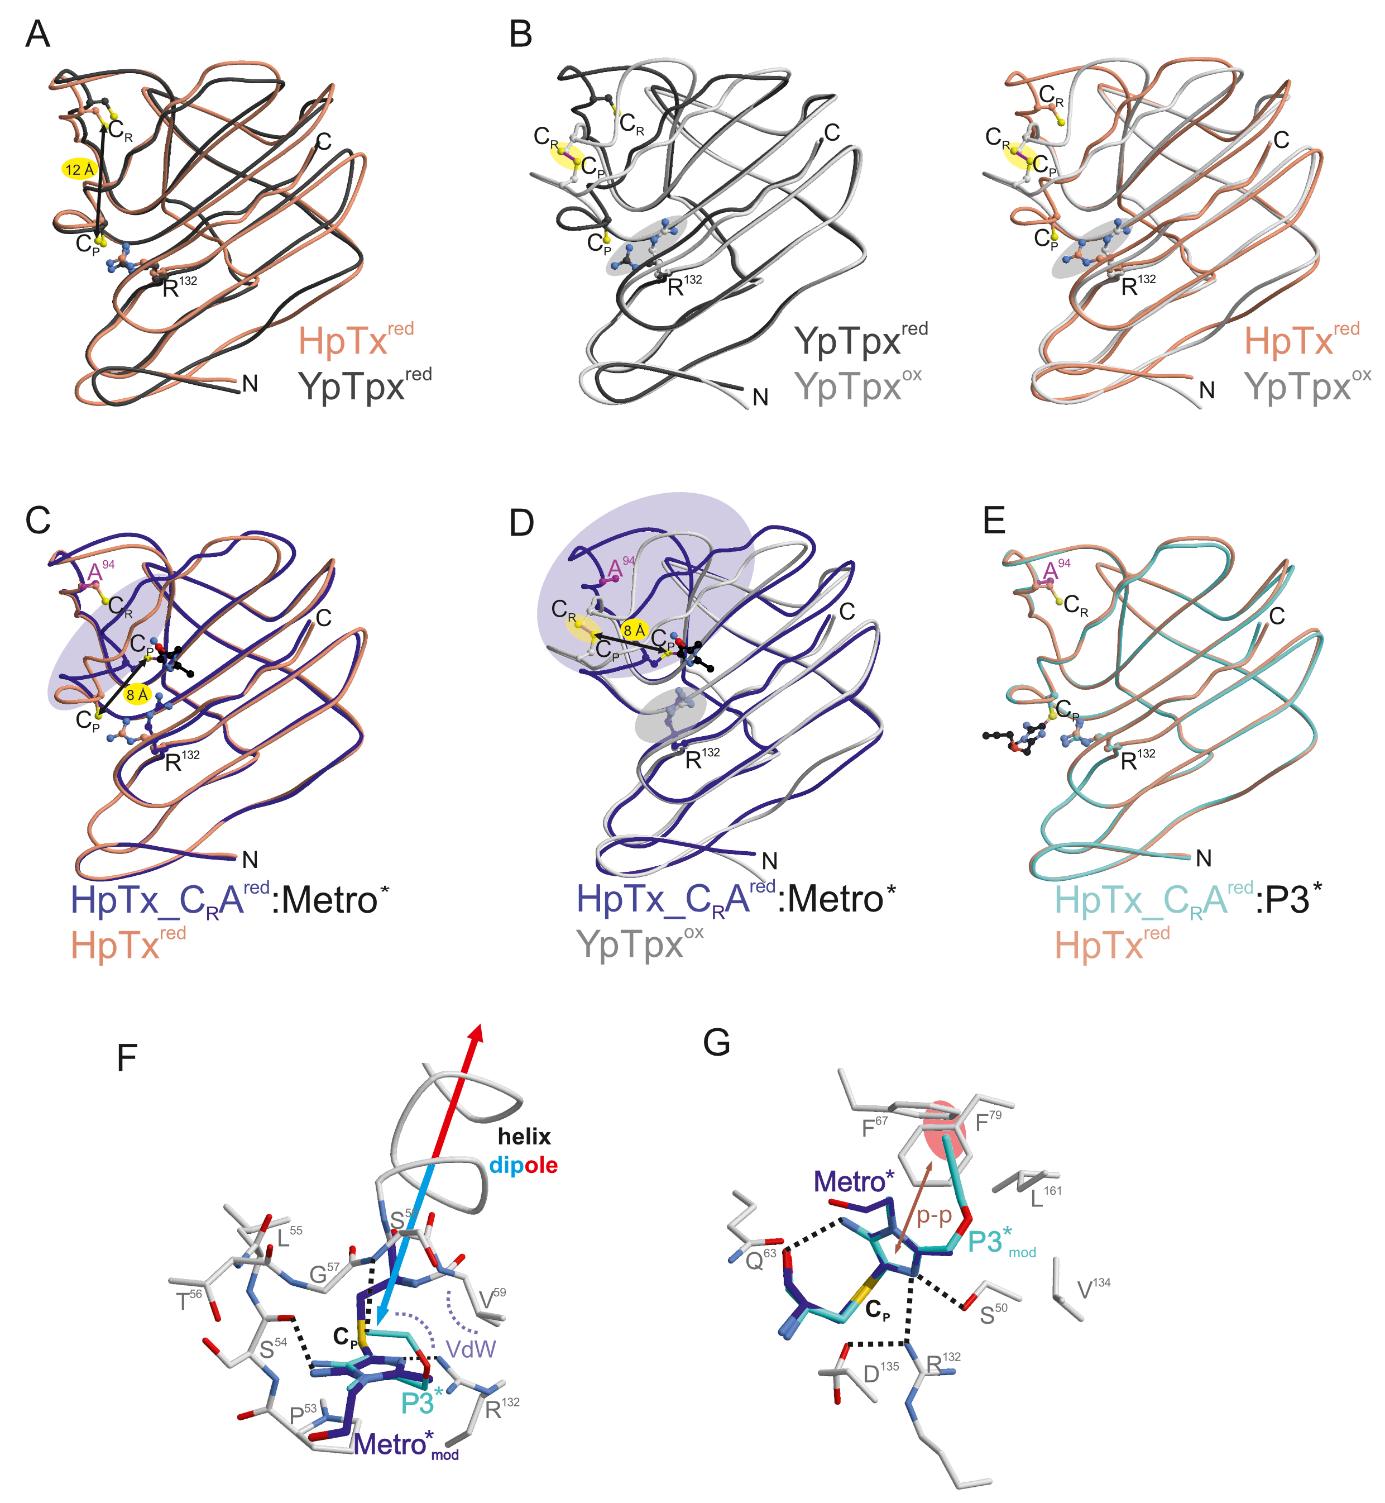


**Figure S 18**: **Comparison of *H. pylori* thiol peroxidase structures**. (**A**) Superposition of HpTpxred (orange, PDB ID 9F5V) and YpTpxred (dark grey, PDB ID 2XPD)[2](#_ENREF_2) reveals high structural similarities. The active site cysteines are positioned 12 Å apart. The strong coordination of CP to Arg132 favors a thiolate ion, thereby enhancing its redox-active nucleophilicity. (**B**) *Left panel:* The comparison between YpTpxred (grey) and YpTpxox (white, PDB ID 3ZRD)[2](#_ENREF_2) illustrates significant structural rearrangements within the active site upon disulfide formation (pink) between CP and CR. Notably, the side chain of Arg132 is flipped by 90° in the oxidized variant. *Right panel:* Superposition of YpTpxox with HpTpxred. (**C)** The overlay of HpTpx_CRA:**Metro*** (purple, PDB ID 9F64) with HpTpxred elucidates major structural rearrangements at helix α1 (light blue) around the CP region, while the mutated CRA site maintains the same conformation as observed in the apo structure (rmsd 0.9 Å, 94% Cα-atoms). Notably, the distance between CP and CRA (pink) is decreased to 8 Å. (**D**) The comparison between HpTpx_CRA:Metro* and YpTpxox demonstrates major structural differences around CP and CR. Interestingly, the Arg132 side chain adopts a similar conformation in the two structures, but no longer interacts with the sulfur atom of CP. (**E**) The HpTpx_CRA:**Metro-P3*** complex (**P3***, cyan, PDB ID 9F65) adopts the same conformation as apo HpTpxred (rmsd 0.4 Å, 99% Cα-atoms,) and presents the inhibitor surface exposed at the CP site. (**F**) **Metro*** (carbon atoms in purple) is modelled into the HpTpx_CRA:**Metro-P3*** complex according to **Figure 4D**, bottom. While **Metro***mod nicely fits into the substrate binding pocket, interactions with protein side chains are less pronounced compared to **Metro-P3***. In addition, the absence of the propargyloxy group prevents **Metro*** from being stabilized by the dipole moment of helix α1 (Ser58NH). (**G**) In HpTpx_CRA, modelled **Metro-P3*** (P3*mod, carbon atoms in cyan) is superimposed on **Metro*** (see **Figure 4D**, top). However, the non-physiological specificity pocket in HpTpx is too small for the propargyloxy residue and severe clashes with Phe67 (highlighted in red) prevent this arrangement. * amine form of respective compounds upon reduction.

**
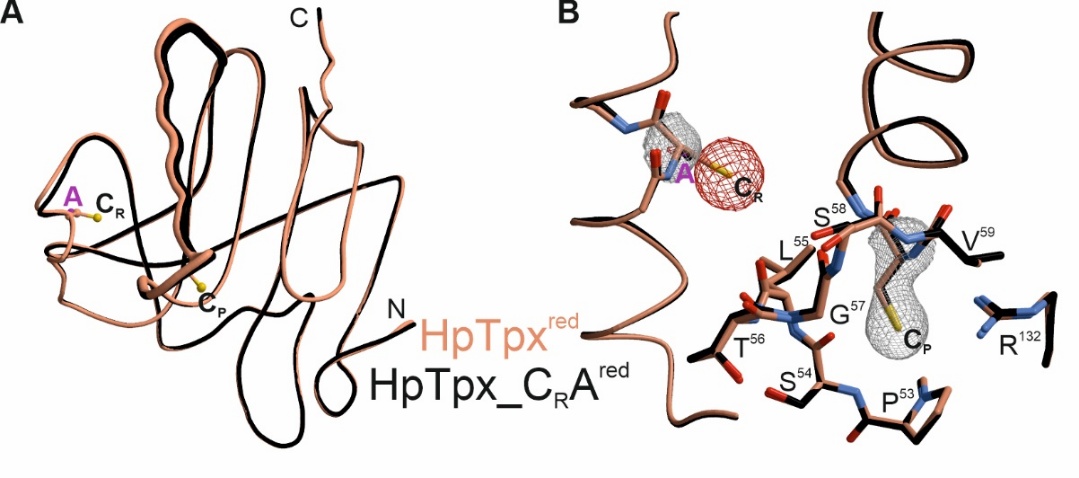
**

**Figure S 19:** Structural comparison of *H. pylori* thiol peroxidase (HpTx) wild type and C94A variant**.** (**A**) Superposition of HpTpxred (orange, PDB ID: 9F5V) and HpTpx_CRAred (black, PDB ID: 9F65; Ala94 in magenta) reveals high structural similarity, with an RMSD of 0.3 Å over 99% of Cα atoms. (**B**) A close-up view of the active sites shows that all residues adopt identical positions. The 2Fo-Fc electron density map (grey mesh, contoured to 1.0σ) is displayed for Cp and Ala94 in HpTpx_CRAred. The Fo-Fc map (red mesh, contoured at −3.0σ) clearly indicates the absence of the sulfur atom when Cys94 is modelled in the HpTpx_CRAred structure.


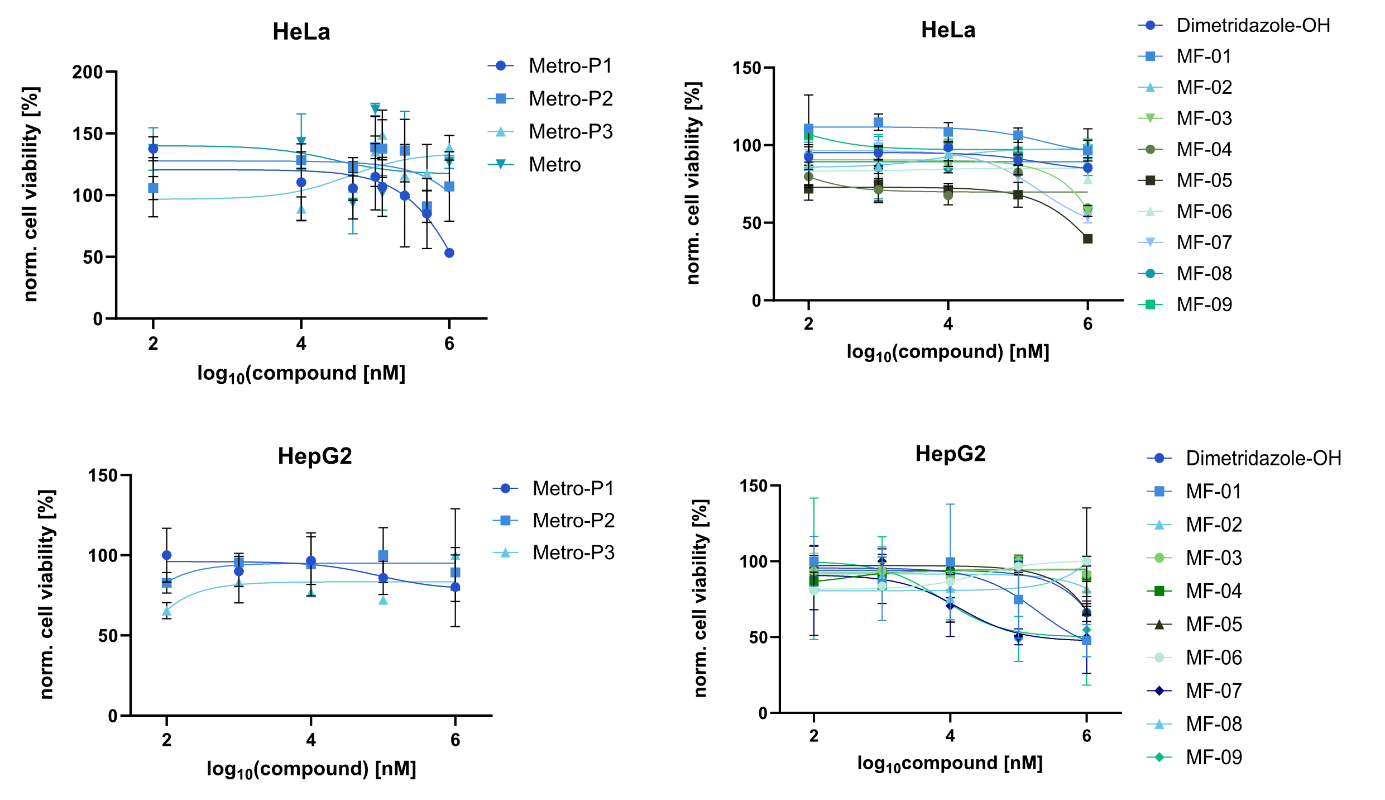


**Figure S 20:** IC50 toxicity evaluations of 5-nitroimidazole compounds in HeLa cells (top) and HepG2 cells (bottom). Values were normalized to DMSO treated cells. Data shown represent mean values ± s.d of technical triplicates (n = 3). Curves were fitted using non-linear regression (log(inhibitor) vs. response - Variable slope (four parameters)) revealing no IC50 values for all compounds.


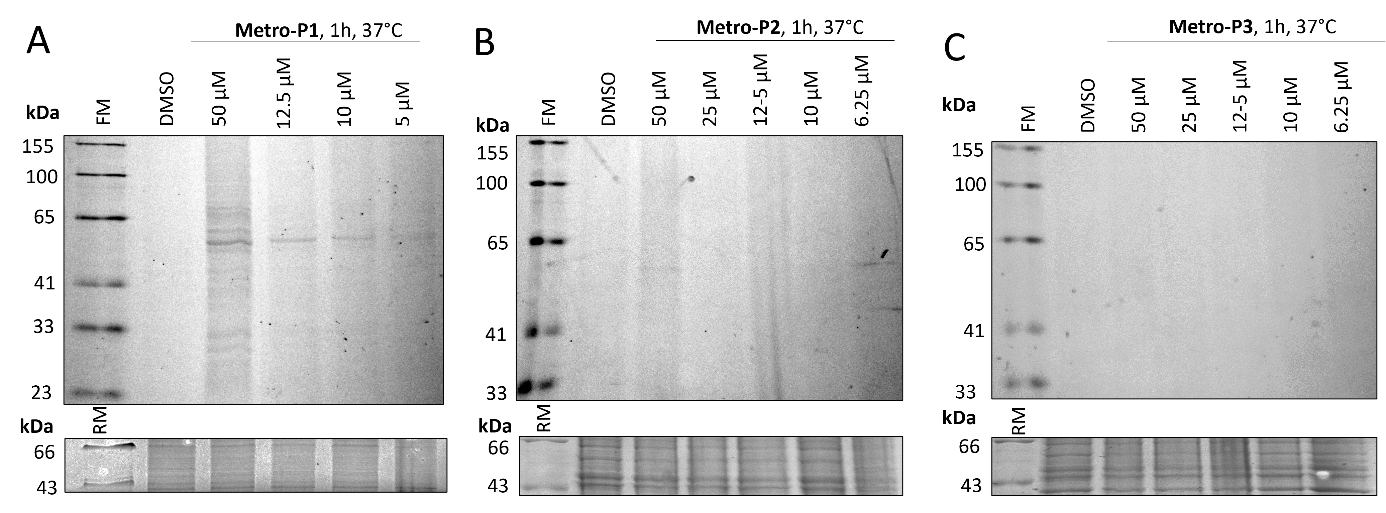


**Figure S 21**: Gel-based ABPP labeling experiments with varying concentrations of **Metro-P1** (**A**), **Metro‑P2** (**B**) and **Metro-P3** (**C**) in HeLa cells. Incubation was performed for 1 h at 37 °C (5% CO2). Top: Fluorescence detection of SDS gel after Click reaction with rhodamine azide. Bottom: Coomassie-staining of SDS gel (loading control). FM = fluorescent marker, RM = Roti marker.


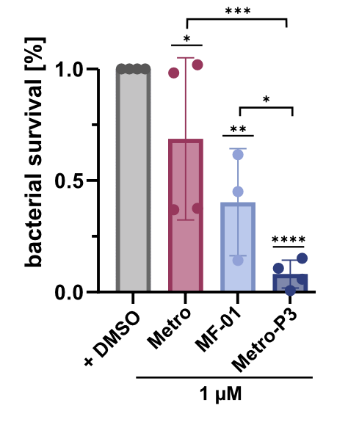


**Figure S 22**: Eradication of H. pylori 26695 in a gastric adenocarcinoma (AGS) adhesion assay with **Metro**, **MF-01** and **Metro-P3** (1 µM). For normalized values, CFUs were normalized to DMSO growth control. Bar charts represent mean values ± s.d. of 3 (**MF-01**) or 4 (**Metro-P3, Metro, DMSO**) biologically independent experiments with three technical replicates per experiment (nbio = 3-4). Statistical significance was determined on normalized data with ordinary one-way ANOVA with multiple comparisons (no correction). p-values: >0.05 (ns), < 0.05 (*), < 0.01 (**), < 0.001 (***), < 0.0001 (****).


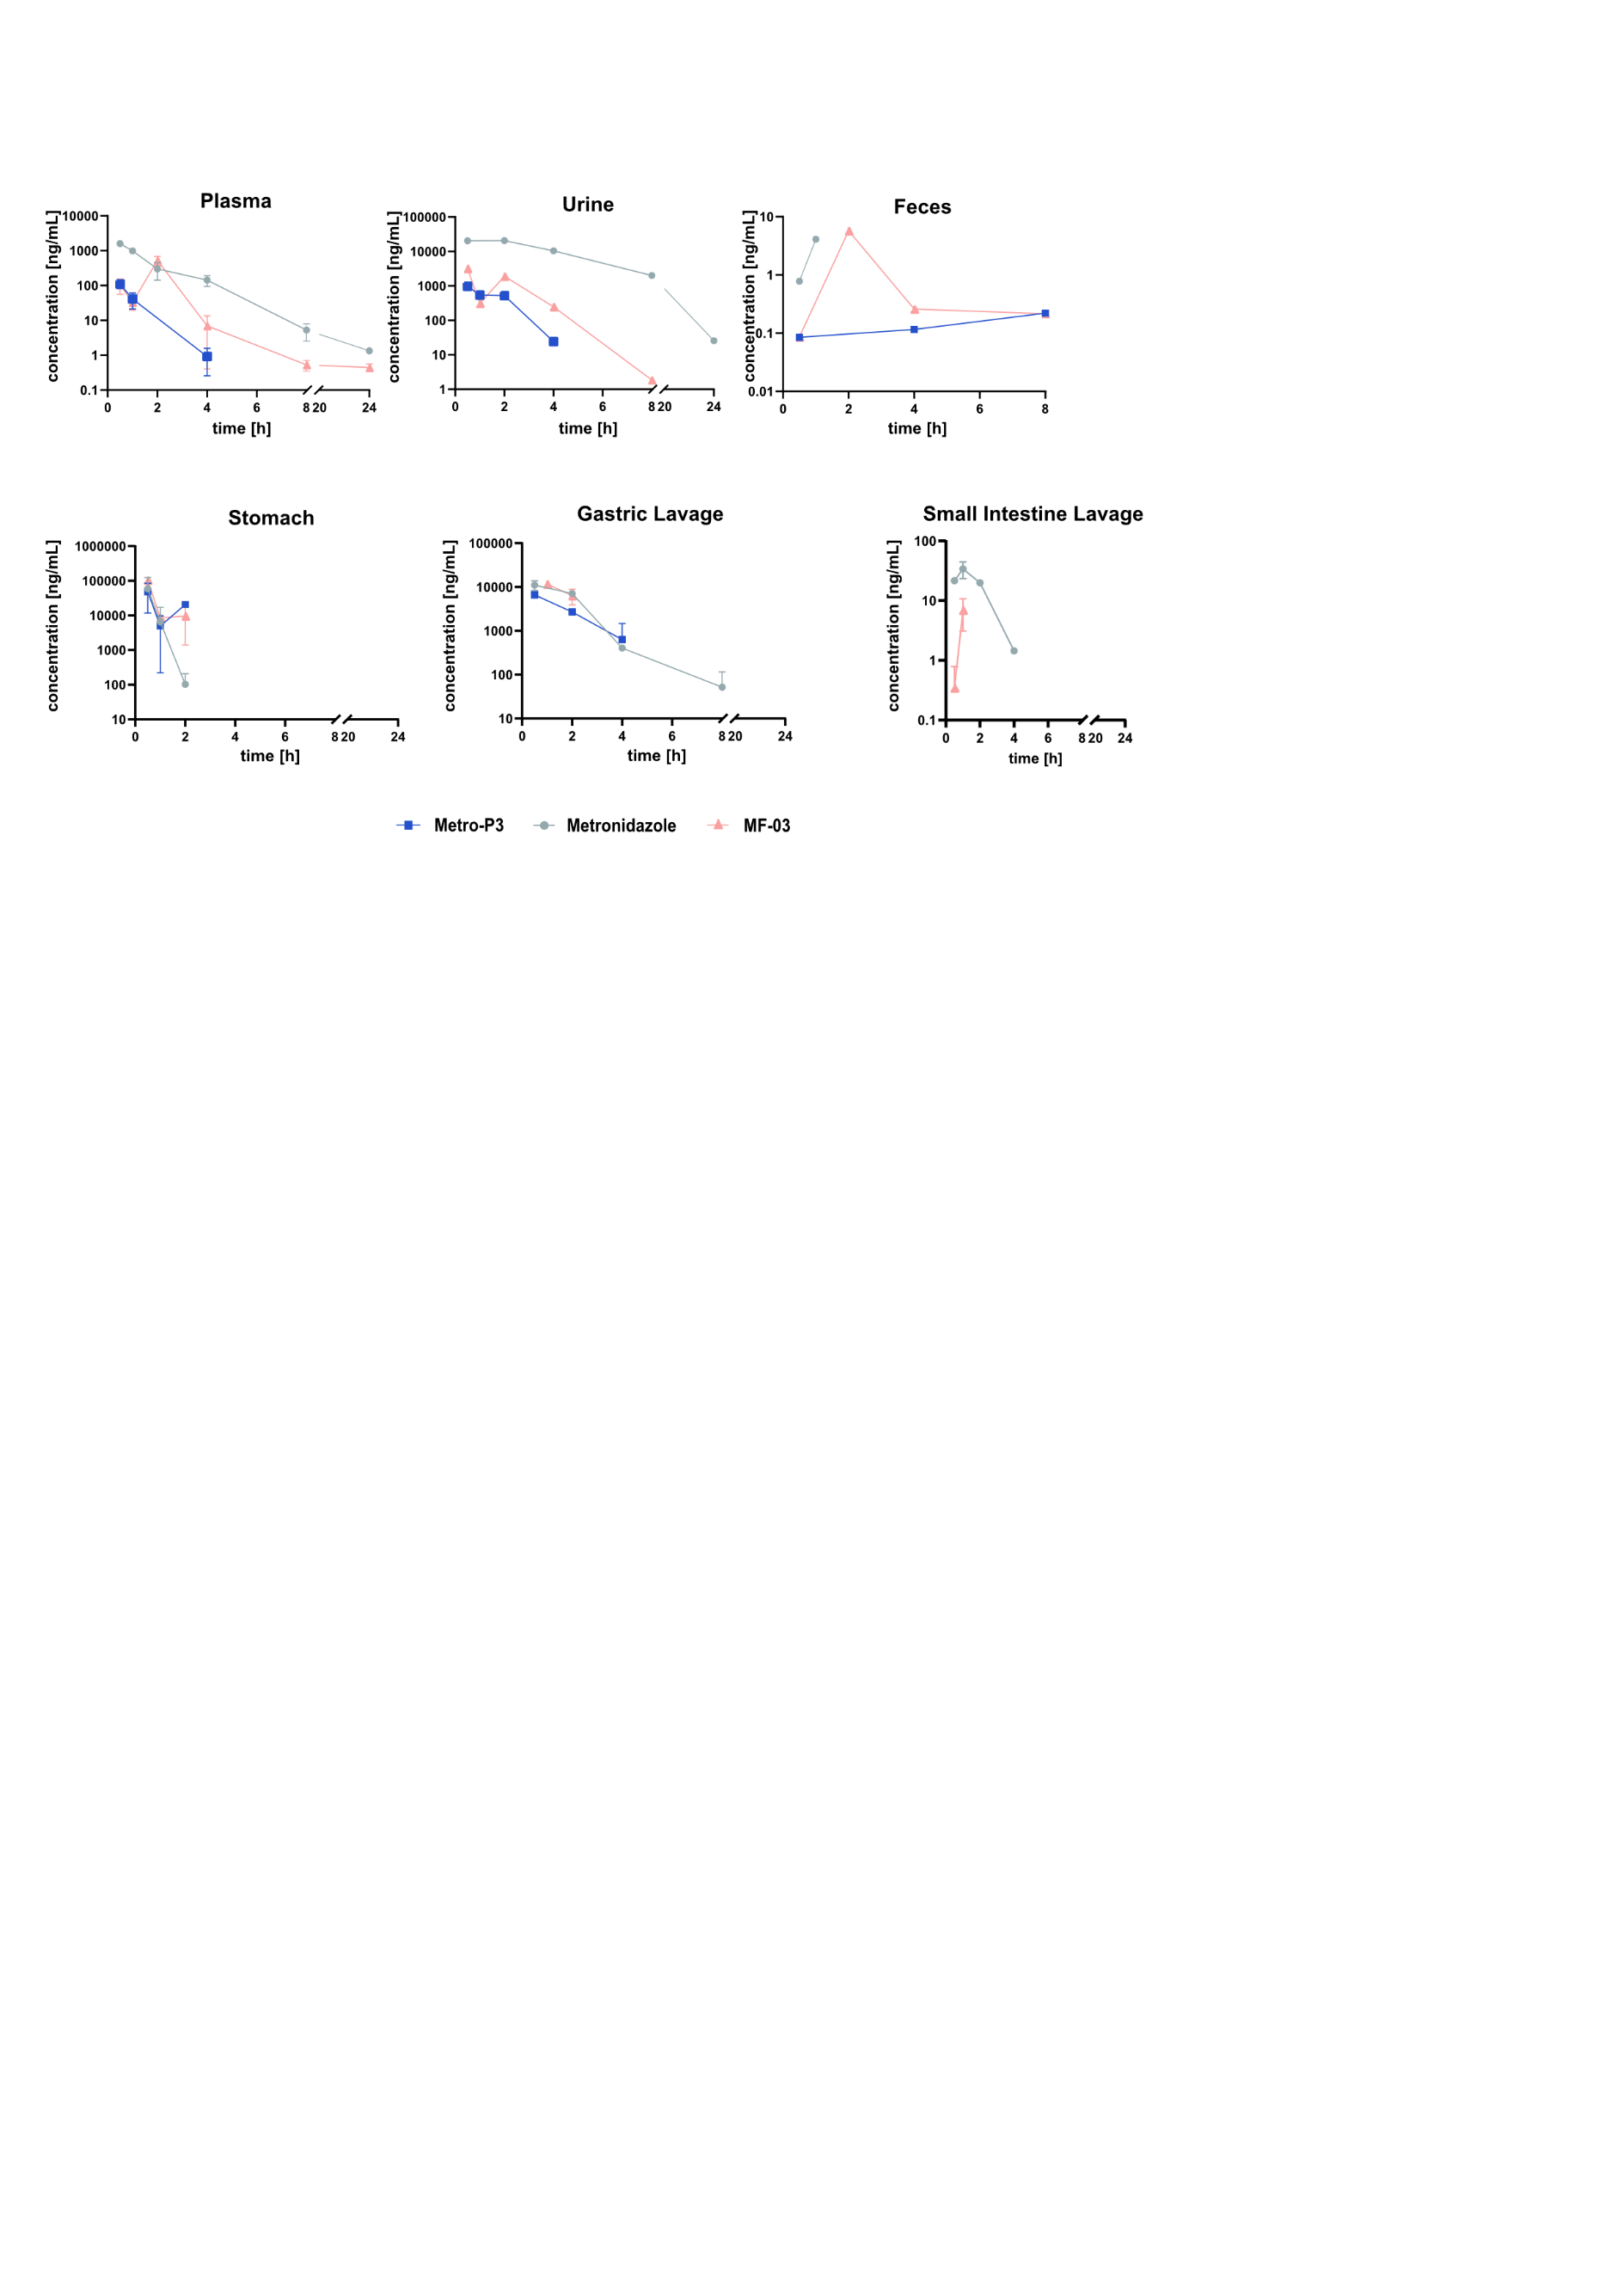


**Figure S 23**: Focused Pharmacokinetic (PK) data of **Metronidazole** (MIC = 2140 ng/mL), **Metro-P3** (MIC = 40 ng/mL) and **MF-03** (MIC = 80 ng/mL) in plasma, urine, feces and stomach (dose: 7.2 mg/kg PO, n = 3 mice per compound). Gastric and small intestine lavages were performed with isotonic NaCl.


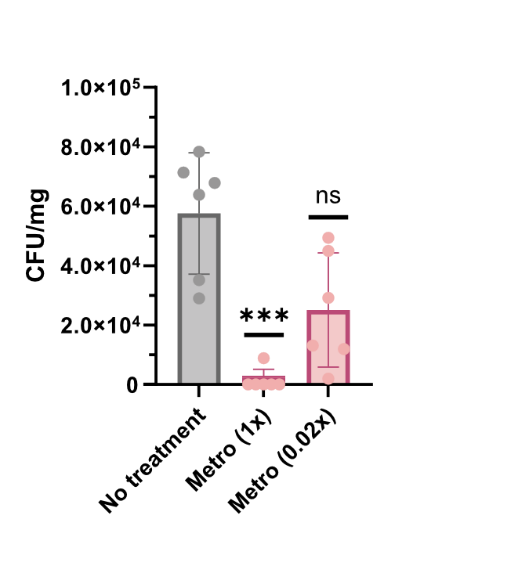


**Figure S 24**: In vivo efficacy studies in C57BL/6 mice infected with H. pylori SS1 strain and treatment with different regimens: No treatment (n = 6), standard triple therapy with Metro (n = 6), triple therapy with low dose of Metro (0.02 × Metro; n = 6). Statistical significance was determined by nonparametric Kruskal-Wallis test with multiple comparisons (no correction) to control column (no treatment). p-values: > 0.05 (ns), < 0.001 (***).


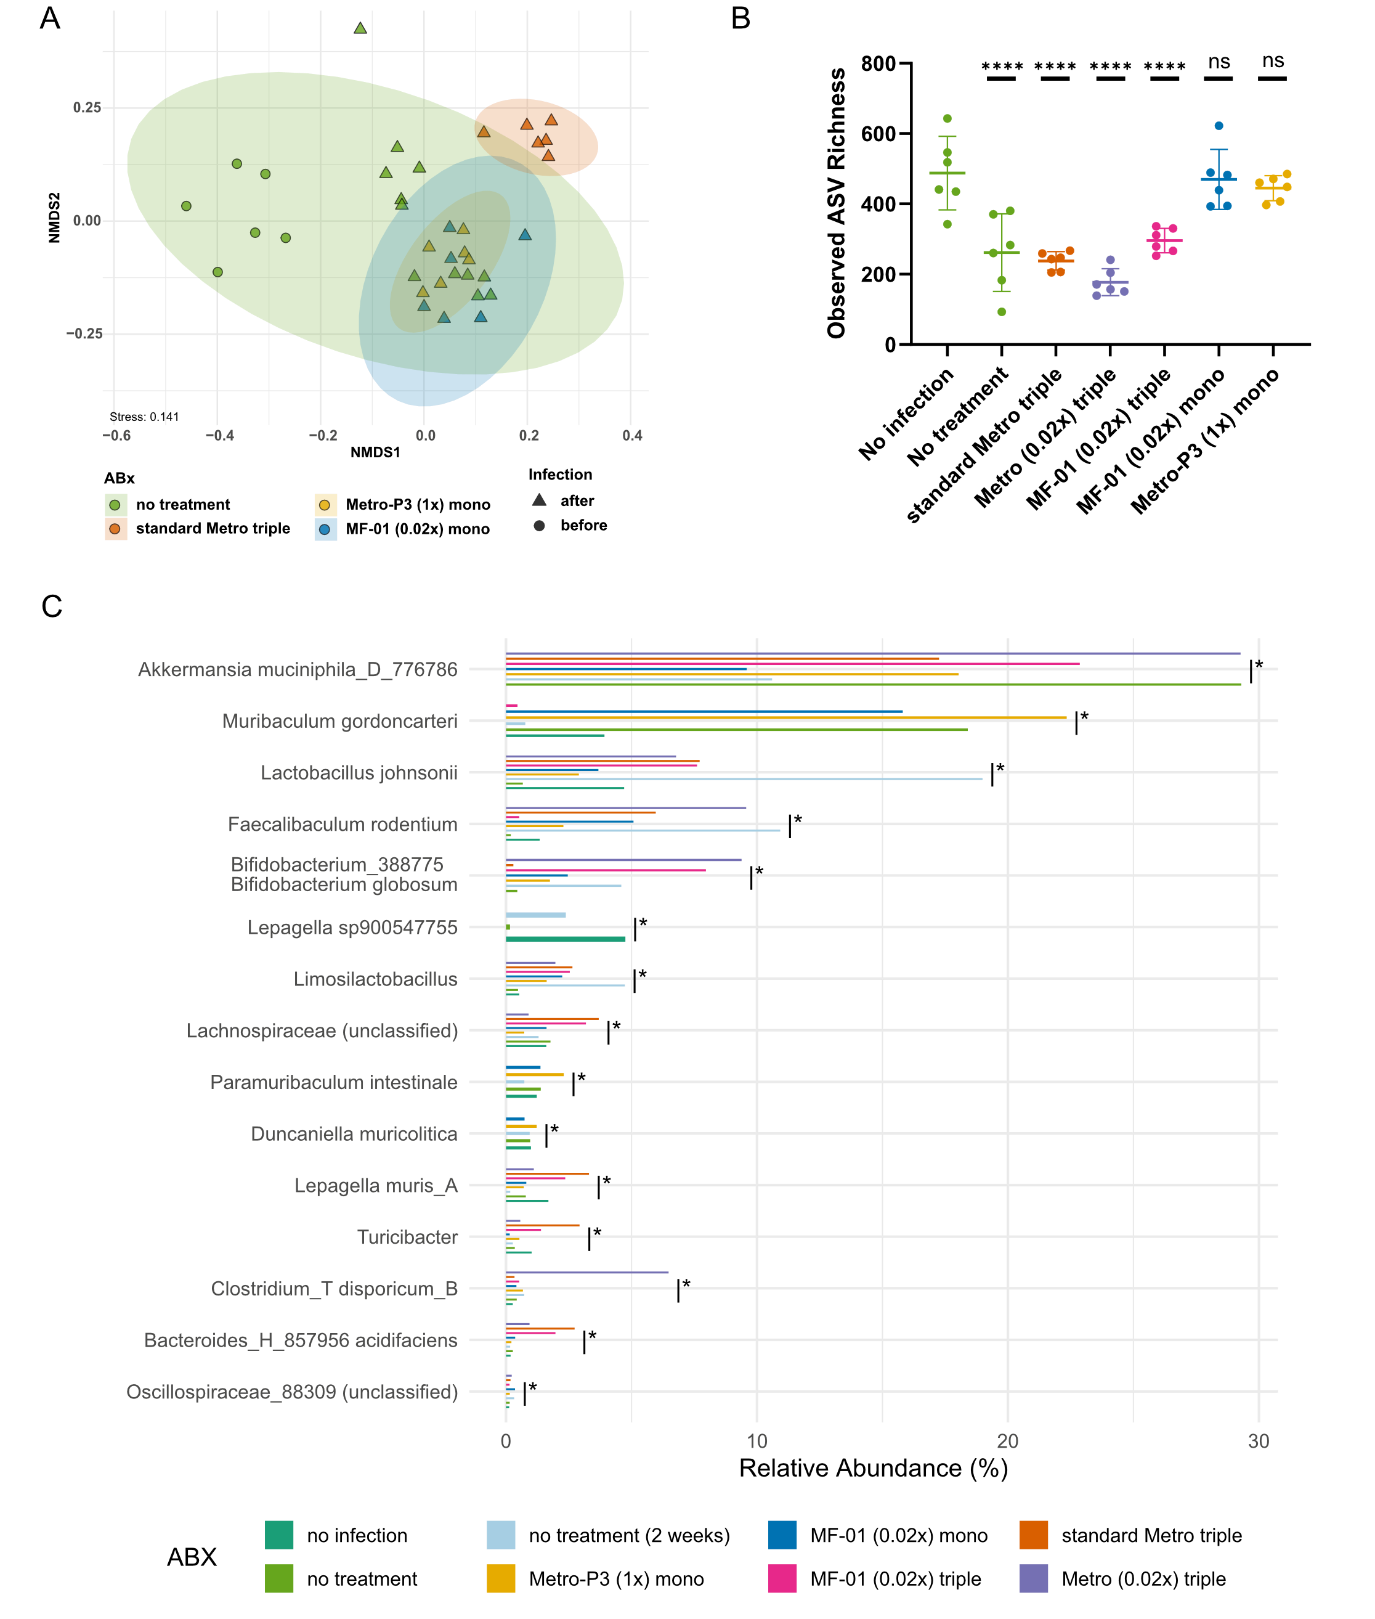


**Figure S 25**: Fecal microbiome studies of C57BL/6 mice infected with *H.* *pylori* SS1 strain and treatment with different regimens: No infection (n = 6), No treatment (n = 6), standard triple therapy with Metro (n = 6), triple therapy with low dose of Metro (0.02 × Metro; n = 6), triple therapy with low dose of MF‑01 (0.02 × Metro; n = 6), mono therapy with low dose of MF-01 (0.02 × Metro; n = 6), mono therapy with Metro-P3 (n = 6). (**A**) NMDS ordination of fecal microbiome profiles based on Bray–Curtis dissimilarity.Each point represents a fecal sample, colored by treatment group. Distances reflect community similarity; ellipses indicate 95% confidence intervals for each group. Pairwise PERMANOVA p−values: no treatment vs standard Metro triple: 0.001; no treatment vs MF-01 (0.02x) mono: 0.013; no treatment vs Metro-P3 (1x) mono: 0.006; standard Metro triple vs MF-01 (0.02x) mono: 0.002; standard Metro triple vs Metro-P3 (1x) mono: 0.002; MF-01 (0.02x) mono vs Metro-P3 (1x) mono: 0.002 (**B**) observed ASV richness. Statistical significance was determined by nonparametric Kruskal-Wallis test with multiple comparisons (no correction) to control column (no treatment). p-values: > 0.05 (ns), < 0.0001 (****). (**C**) Differentially abundant species. p-values: < 0.05 (*)

# Supplemental Tables

**Table S 1**: MIC values of Metro and Metro-P3 in (moderately) resistant clinical isolates of *H. pylori* 26695 (n = 3). MIC values were determined in three biological replicates (n = 3). For MIC values given as a range, the higher MIC value was observed in one biological replicate.

|  | **MIC [µM]** | |
| --- | --- | --- |
| ***H. pylori***  **Clinical isolate** | **Metro** | **Metro-P3** |
| 18 | 31.3-62.5 | 62.5-125 |
| 23 | 125 | 125 |
| 25 | 15.6 | 0.48 |
| 27 | 31.3-62.5 | 1.95 |
| 31 | 62.5 | 125 |
| 32 | 31.25 | 0.48 |
| 42 | 125 | 7.8 |
| 46 | 62.5 | 15 |
| 52 | 31.3-62.5 | 3.9-7.8 |
| 57 | 31.3-62.5 | 0.48 |
| 126 | 125 | 62.5 |
| 129 | 125 | 62.5-125 |
| 143 | 15.6-31.25 | 0.48 |
| 162 | 62.5-125 | 15.6-31.3 |

**Table S 2**: Measured MIC values of **metronidazole**, **Metro-P1**, **Metro-P2**, **Metro-P3** and **Metro-P4** in different bacterial strains: *H. pylori* (microaerophilic), *C. difficile* (anaerobic), *E. coli* (aerobic), *S. aureus* (aerobic) in three biological replicates (n = 3).

| MIC values | ***H. pylori*** | ***C. difficile*** | ***E. coli*** | ***S. aureus*** |
| --- | --- | --- | --- | --- |
| **Metronidazole** | 12.5 µM | 1 µM | >1 mM | >1 mM |
| **Metro-P1** | 390 nM | 6.25 µM | >1 mM | >1 mM |
| **Metro-P2** | 3.13 µM | 1 µM | >1 mM | >1 mM |
| **Metro-P3** | 195 nM | 6.25 µM | >1 mM | >1 mM |
| **Metro-P4** | 50 µM | n.d. | >1 mM | >1 mM |
| Dimetridazole |  | 500 nM |  |  |
| MF-01 |  | 6.25 µM |  |  |
| MF-02 |  | 6.25 µM |  |  |

**Table S 3**: Summarized mean values of *in vitro* data of synthesized 5-nitroimidazole compounds. MIC values were determined in three biological replicates (n = 3). For MIC values given as a range, the higher MIC value was observed in one biological replicate. MTT assays were performed in technical replicates (n = 3) in two different cell lines. Plasma stability assays were performed in 3 biological replicates (n=3).

| **Compound** | **MIC**  **(*H. pylori* 26695)** | | **MIC**  ***(H.pylori* PMSS1)** | **MTT**  **IC50 (HeLa)** | **MTT**  **IC50 (HepG2)** | **plasma stability [t=28h]** |
| --- | --- | --- | --- | --- | --- | --- |
| **Metro** | 12.5 µM | 2.14 µg/mL | 3.125 µM | > 1 mM | n.d. | 94% |
| **Metro-P1** | 390 nM | 80 ng/mL | < 97 nM | > 1 mM | > 1 mM | 62% |
| **Metro-P2** | 3.13 µM | 0.65 µg/mL | 780 nM - 1.56 µM | > 1 mM | > 1 mM | 84% |
| **Metro-P3** | 195 nM | 40 ng/mL | 195 nM - 390 nM | > 1 mM | > 1 mM | 43% |
| **MF-01** | 780 nM | 140 ng/mL | < 97 nM | > 1 mM | > 1 mM | 38% |
| **MF-02** | 390 nM | 70 ng/mL | 195 nM - 390 nM | > 1 mM | > 1 mM | 0%, (t1/2 = 3.8 h) |
| **MF-03** | 390 nM | 80 ng/mL | < 97 nM | > 1 mM | > 1 mM | 81% |
| **MF-04** | 390 nM | 70 ng/mL | 390 nM | > 1 mM | > 1 mM | 0% (t1/2 < 2 h) |
| **MF-05** | 390 nM | 80 ng/mL | < 97 nM | > 1 mM | > 1 mM | >99% |
| **MF-06** | 390 nM | 80 ng/mL | 390 nM | > 1 mM | > 1 mM | >99% |
| **MF-07** | 390 nM | 80 ng/mL | < 97 nM | > 1 mM | > 1 mM | 87% |
| **MF-08** | 390 nM | 80 ng/mL | 390 nM | > 1 mM | > 1 mM | 33% |
| **MF-09** | 1.56 -3.13 µM | 75 ng/mL | 390 nM | > 1 mM | > 1 mM | 81% |

**Table S 4**: H. pylori MS-based ABPP proteins hits for **Metro-P1** (1 µM), **Metro-P2** (1 µM) and **Metro‑P3** (1 µM) selected based on an enrichment ratio of log2 >1.5 and p-value of <0.01 and additionally filtered for q-values of <0.05. Fold Enr. = Fold Enrichment, log2(difference); Sign. = Significance, -log10(p-value). Two-tailed Student’s t test (probe vs DMSO control) was performed for statistical evaluation. Each condition was performed in biological triplicates (n = 3).

| **Probe** | **UniProt** | **Protein Name (Gene Name)** | **Fold Enr.** | **Sign.** |
| --- | --- | --- | --- | --- |
| **Metro-P1** | O25096 | NH3-dependent NAD+ synthetase (*nadE*) | 4.00 | 4.29 |
| O25151 | Thiol peroxidase (*tpx*) | 1.73 | 3.19 |
| O25874 | Aminopyrimidine aminohydrolase | 1.23 | 2.73 |
| P42383 | 60 kDa chaperonin | 1.08 | 3.62 |
| **Metro-P2** | O25096 | NH3-dependent NAD+ synthetase (*nadE*) | 3.33 | 3.98 |
| O25356 | 7-cyano-7-deazaguanine synthase | 1.04 | 2.62 |
| P42383 | 60 kDa chaperonin | 1.04 | 3.46 |
| **Metro-P3** | O25151 | Thiol peroxidase (*tpx*) | 4.27 | 5.49 |
| P42383 | 60 kDa chaperonin (*groEL*) | 1.17 | 4.21 |

**Table S 5:** Measured MIC values of **metronidazole**, **Metro-P3** and **MF-01** in different anaerobic bacterial strains of the murine microbiome: Bacteroides caecimuris (I48), Muribaculum intestinale (YL27) (anaerobic), Enterococcus faecalis (KB1), Bifidobacterium animalis (YL2) in two biological replicates (n = 2).

|  | **Gram-negative** | | **Gram-positive** | |
| --- | --- | --- | --- | --- |
| **MIC [µM]** | *B. caecimuris* I48 | *M.intestinale* YL27 | *E. faecalis* KB1 | *B. animalis* YL2 |
| **Metro** | 6.25 - 12.5 | 0.78 | >50 | >50 |
| **Metro-P3** | 25 | 3.13 | >50 | >50 |
| **MF-01** | 25 | 1.56 | >50 | >50 |

# Supporting Structural Information

**SSI1**

To elucidate the molecular mechanism of Metro and Metro-P3 inhibition, we solved high-resolution structures of HpTpx alone and with both ligands. The protein was heterologously expressed in *Escherichia coli* and purified by StrepTag affinity and size exclusion chromatography. While the oxidized conformation of HpTpx did not crystallize, we first determined the structure of the reduced state (HpTpxred) at 1.75 Å resolution (PDB ID 9F5V, **Table S16**). HpTpxred forms a homodimer with two identical catalytic centers and, similar to the thiol peroxidase (Tpx) from *E. coli*[*3*](#_ENREF_3), each subunit is composed of a five-stranded β-sheet flanked by four α-helices. A structural homology search using the DALI server[4](#_ENREF_4) identified Tpx from *Yersinia pseudotuberculosis* (YpTpx) as the best hit[2](#_ENREF_2) (PDB ID: 2XPD, Z-score = 24.3, backbone root mean square deviation (rmsd) = 1.2 Å, 93% Cα-atoms, sequence identity 39%). In HpTpxred, classified as an atypical 2-Cys Tpr, the peroxide-binding Cys60 (CP) is located at the N-terminal part of helix α1 (**Figure S17A**). The strong coordination of CP to Arg132 reduces the pKa value at the sulfur atom by stabilizing the thiolate ion and increasing its redox-active nucleophilicity. During catalysis, CP reacts covalently with hydroperoxides to form a cysteine-sulfenic acid adduct (CP-SOH). The subsequent condensation of CP-SOH occurs via the resolving Cys94 residue (CR) in helix α2, resulting in HpTpxox with an intramolecular disulfide bridge between CP and CR (**Figure S17B**).

Next, the structure of HpTpx in complex with Metro was determined. However, inhibition requires a stepwise reduction of the nitro group in Metro prior to nucleophilic aromatic substitution by HpTpx. To this end, we have heterologously expressed a C94A mutant (HpTpx_CRA) in the presence of **Metro** and demonstrate that only the reduced ligand (**Metro***) is bound to the variant. The crystal structure of HpTpx_CRA in complex with **Metro*** displays the inhibitor fully defined in the Fo-Fc electron density map at 1.75 Å resolution (PDB ID 9F64, **Table S16**), which forms an irreversible thioether bond with the CP residue (**Figure 4D**, top). While the superposition of HpTpx_CRA:Metro* with HpTpxred exhibits identical conformations in the mutated Ala94 region (rmsd 0.9 Å, 94% Cα-atoms, **Figure S17C**), significant structural rearrangements occur in the ligand bound structure at the catalytic center of the CP residue. Helix α1 is shortened by two turns, distorted, and CP is shifted by 8 Å compared to HpTpxred. Intriguingly, **Metro*** generates a well-defined specificity pocket at the active site that is absent in HpTpxred as well as in YpTpxox (**Figure S17D**).[2](#_ENREF_2) The interaction between the protein and **Metro*** is mediated by rearrangements of the aromatic amino acids Phe67, Phe79, and Tyr158 that stabilize the ligand’s imidazole scaffold by π-π stacking (**Figure 4D,** top). Notably, Arg132 remains close to CP and forms strong hydrogen bonds with Asp135-Oε1 as well as Ser50-Oγ. Furthermore, Arg132 and Ser50 are H-bonded to the sp2-hybridized N3 nitrogen atom of **Metro***. The hydroxyethyl side chain at N1 interacts with Gln63ε1, while the methyl group at C2 engages in van-der-Waals contacts with Val134, Pro158, and Leu161. A prominent hydrogen bond, formed between the generated amine group of **Metro*** at C4 and the carbonyl oxygen of CP, provides a rationale for the inhibition of HpTpxred by the ligand. This coordination is impossible with a nitro group and explains why Metro only acts as an HpTpx inhibitor upon its reduction.

While **Metro** and **Metro-P3** share high structural similarities, the latter compound is a 60-fold more potent antibiotic. We therefore solved the crystal structure of HpTpx_CRA with **Metro-P3*** (nitro group reduced to amine) at 1.95 Å resolution (PDB ID 9F65, **Table S16**). As expected, the ligand forms a covalent thioether bond with CP (**Figure 4D**, bottom), but surprisingly, HpTpx retains apo conformation (rmsd 0.4 Å, 99% Cα-atoms, **Figure S17E**). Subtle shifts allow for hydrogen bonds between the side chain of Arg132 and the main chain atom Ile152O as well as the sp2-hybridized N3 nitrogen of **Metro-P3***. The methylene moiety within the propargyloxy side chain of **Metro-P3*** interacts via van-der-Waals contacts with the aliphatic residues Val59 and Leu153. The nucleophilicity of the propargyl group may be enhanced via the helix dipole (α1) moment of Ser58NH (distance 3.2 Å) and aligns the entire inhibitor within the spacious substrate binding pocket. Most importantly, however, the robust hydrogen bonds formed between **Metro-P3***-NH2 and the carbonyl oxygen of Ser54O explain why the prodrug **Metro‑P3** with its nitro group cannot act as an inhibitor of HpTpx.

Although **Metro*** and **Metro-P3*** form the same irreversible thioether bond with CP in the native state of HpTpxred, the different ligand coordination in HpTpx_CRA:**Metro*** versus HpTpx_CRA:**Metro‑P3*** is highly unexpected (**Figure 4E**). While the HpTpx_CRA:**Metro*** complex depicts substantial structural rearrangements in helix α1, such conformational changes are absent in HpTpx_CRA:**Metro‑P3***. The modeling of **Metro*** in the HpTpx_CRA:**Metro-P3*** structure demonstrates a precise fit within the substrate binding pocket (**Figure S15F**). However, the less pronounced interactions of **Metro*** with enzyme residues and the absence of the propargyloxy group, crucial for a prominent helix-dipole interaction in HpTpx_CRA:**Metro-P3***, are consistent with its phenotypic 60-fold enhanced biological activity. Conversely, the rigid and bulky propargyloxy group of **Metro-P3*** fails to be accommodated into the binding pocket of **Metro*** due to severe clashes with Phe67 (**Figure S17G**).

Intriguingly, the diverse binding modes of **Metro-P3*** and **Metro*** provide valuable molecular insights into HpTpx catalysis. In the former complex, the CP and CR residues maintain the same positions as in the HpTpxred structure (**Figure S17E**), even though CP forms a thioether bond with **Metro-P3***. Notably, the propargyloxy group of the inhibitor stabilizes this state via the dipole moment of helix α1, allowing Arg132 to preserve its orientation despite the disruption of its ionic interaction with CP (**Figure 4D**, bottom). In contrast, this stabilization is absent in HpTpx_CRA:**Metro***, resulting in increased flexibility within the CP region (**Figure 4D, top**). Here, Arg132 adopts the conformation previously observed in YpTpxox (**Figure S17D**).[2](#_ENREF_2) Although **Metro*** induces a structural distortion of helix α1, the entropic penalty is balanced by enthalpic stabilization of the inhibitor within an induced non-physiological specificity pocket. Thus, CP modification by either the natural substrates, **Metro*** or **Metro-P3*** disrupts the salt bridge between the CP thiolate and Arg132 residues and induces flexibility in the surface-exposed helix α1. However, structural changes in the CR region may only occur in the presence of the natural CP-SOH reaction intermediate that initiates the condensation via CP-CR disulfide bond formation.

# Material and Methods

## General Remarks for Synthesis

**Reagents and Solvents**

Unless otherwise stated, commercially available reagents and starting materials are obtained from *Sigma Aldrich*, *TCI Europe*, *VWR*, *Roth*, BLDpharm and *Alfa Aesar* and starting compounds were used without further purification and stored as indicated. All reactions sensitive to air and moisture were carried out using standard *Schlenk* techniques under argon atmosphere in flame-dried glassware. Anhydrous solvents and water-sensitive liquid chemicals are transferred using argon flushed syringes.

**Thin Layer Chromatography (TLC)**

For thin layer chromatography (TLC) silica coated plates (aluminium, *Merck*, silica 60 F254) were used. For visualization, the spots were detected by using UV-light (254 nm and 366 nm) or by staining with a potassium permanganate solution (3.00 g KMNO4, 20.0 g K2CO3 and 5.00 mL 5 % NaOH (aq.) in 300 mL water) followed by heat treatment. Column chromatography was carried out using silica gel (40-63 *µ*m (Si 60)) from *Merck*.

**High Pressure Liquid Chromatography (HPLC)**

Compounds were purified using preparative, reversed-phase HPLC using a *Waters* 2545 quaternary gradient module equipped with a fraction collector on an *YMC* Triart C18 column (250 × 10 mm, 5 *µ*m). Gradient is listed in **Table S4** using ddH2O and HPLC-grade acetonitrile (no TFA) as the mobile phase.

**Table S 6**: Used gradient for HPLC purification.

| **t (min)** | **H2O (%)** | MECN **(%)** |
| --- | --- | --- |
| 0 | 98 | 2 |
| 1 | 98 | 2 |
| 12 | 2 | 98 |
| 13 | 2 | 98 |
| 14 | 2 | 98 |
| 15 | 98 | 2 |
| 17 | 98 | 2 |

**Nuclear Magnetic Resonance Spectroscopy (NMR)**

Nuclear Magnetic Resonance (NMR) spectra were measured at room temperature either on a *Bruker* AVHD-400 or AVHD-300. The chemical shifts are given in *δ* values in ppm (parts per million) and calibrated to the residual proton signals of the solvents relative to the internal standard tetramethylsilane:

Chloroform-*d1* (1H-NMR: *δ* = 7.26 ppm, 13C-NMR: *δ* = 77.2 ppm)

The NMR multiplicities are given as singlets (s), doublets (d), triplets (t), quartets (q) , pseudo-sextets (ps) or multiplets (m). The coupling constants *J* are reported in Hertz (Hz). NMR data were analysed using MestReNova (Mestrelab Research)

**Mass Spectrometry (MS)**

High-Resolution Mass Spectrometry (HR-MS) was performed on a LTQ-FT Ultra mass spectrometer (*Thermo Fisher Scientific*). ESI is used as an ionization method. Low resolution LC-MS measurements were conducted on a MSQ Plus mass spectrometer (*Thermo Fisher Scientific*). Processing of mass spectrometry data was done by Xcalibur 2.2 (*Thermo Fisher Scientific*).

## Synthesis

#### **Metro-P1 (2-methyl-5-nitro-1-(2-(prop-2-yn-1-yloxy)ethyl)-1H-imidazole)**

To a suspension of metronidazole (200 mg, 1.17 mmol, 1.00 eq.) and Cs2CO3 (838 mg, 2.57 mmol, 2.20 eq.) in DMF (4 mL) is added propargyl bromide solution (80 % in toluene, 0.30 mL, 2.78 mmol, 2.40 eq.) and heated to 50 °C for 96 h. The reaction mixture is quenched *via* addition of H2O (5 mL) and extracted with EtOAc (3 × 20 mL). Combined organic layers are subsequently washed with 5 % LiCl solution (aq., 15 mL) and brine (20 mL), dried over Na2SO4 and the solvent is removed *in vacuo*. The crude product is further purified performing column chromatography (EtOAc 100 %) and high-performance liquid chromatography (HPLC) to obtain 74.4 mg of the desired probe **Metro-P1** ( 1.17 mmol, 30 %) as a white solid.

**TLC:** *Rf*= 0.45 (EtOAc) [UV].

**1H NMR** (400 MHz, CDCl3) δ (ppm) = 2.39 (t, 4*J* = 2.3 Hz, 1H), 2.52 (s, 3H), 3.86 (t, 3*J* = 4.9 Hz, 2H), 4.08 (d, 4*J* = 2.3 Hz, 2H), 4.51 (t, 3*J* = 4.9 Hz, 2H), 7.96 (s, 1H).

**13C NMR** (101 MHz, CDCl3) δ (ppm) = 14.8, 46.6, 58.7, 68.6, 75.3, 78.8, 133.4, 152.0.

**HR-MS** (ESI): *m/z* = calc. [M+H]+: 210.0878, found: 210.0874.

##### **2-(2-Methyl-5-nitro-*1H*-imidazol-1-yl)acetaldehyde (1)**

Synthesis of (1) is adapted from a published procedure.[5](#_ENREF_5)

To 160 mL of CH2Cl2 is added dropwise 2.00 mL (20.0 mmol, 1.10 eq.) of oxalyl chloride under Argon atmosphere. The solution is cooled to −78 °C and 10 mL of DMSO is added dropwise to the stirred solution. After 20 minutes, 3.42 g (20 mmol, 1.00 eq.) of metronidazole dissolved in 15 mL of DMSO is added. After 20 min of additional stirring, 33 mL (240 mmol, 12.0 eq.) of NEt3 is added. The reaction mixture is stirred for 10 min at −78 °C and is then allowed to warm to room temperature. The mixture is diluted with EtOAc (400 mL) and washed with water (4 × 75 mL). The water phase is extracted with EtOAc (3 × 50 mL). The combined organic layers are washed with brine (150 mL), dried over Na2SO4 and the solvent is removed *in vacuo*. The resulting crude residue is purified by flash silica gel chromatography (CH2Cl2/MeOH 40:1 v/v) to give the target compound (**1**) (1.20 g, 7.09 mmol, 32 %) as an orange, viscous oil.

**TLC:** *Rf*= 0.78 (CH2Cl2/MeOH 10:1) [UV].

**1H NMR** (400 MHz, CDCl3) δ (ppm) = 2.41 (s, 3H), 5.21 (s, 2H), 7.99 (s, 1H), 9.75 (s, 1H).

**13C NMR** (101 MHz, CDCl3) δ (ppm) = 14.0, 54.8, 132.8, 132.9, 150.4, 191.6.

**LR-MS**: *m/z* = calc. [M+H]+: 170.06, found: 170.11.

**Metro-P2 (1-(2-Methyl-5-nitro-*1H*-imidazol-1-yl)pent-4-yn-2-ol)**

The *Grignard* preparation of propargylmagnesium bromide was adapted from a literature procedure by *Ratsch et al*. [6](#_ENREF_6)

A mixture of 620 mg (25.5 mmol, 1.78 eq.) of magnesium turnings, 3.56 g (15.8 mmol, 1.10 eq.) of ZnBr2 and iodine (5 mol %) in dry THF (5 mL) is stirred for 15 min at room temperature. Then, a solution of propargylbromide (1.55 mL, 80 % in toluene, 14.4 mmol, 1.00 eq.) in dry THF (15 mL) is added dropwise. When the reaction mixture starts to reflux, it is cooled to 0 °C. After complete addition of the bromide, the reaction mixture is stirred for 1 h at room temperature. Full conversion is assumed, and the crude material is directly used in the subsequent step.

**1** (500 mg, 2.96 mmol, 1.00 eq.) is dissolved in dry THF (8 mL) and 5.30 mL (3.84 mmol, 1.30 eq.) of previously synthesized *Grignard* reagent is added. The mixture is stirred for 2 h at room temperature and then poured into ice water. Saturated aqueous NH4Cl solution (20 mL) is added to dissolve the precipitate and the organic layer is separated. The aqueous layer is extracted with Et2O (3 × 30 mL). Combined organic extracts are washed with brine (2 × 20 mL) and dried over Na2SO4. After evaporation of the solvent the residue is purified by column chromatography (EtOAc 100 %) and HPLC to obtain 34.0 mg (0.16 mmol, 5 %) of the desired probe **Metro-P2** as a viscous orange oil.

**TLC:** *Rf*= 0.41 (EtOAc) [UV].

**1H NMR** (300 MHz, CDCl3) δ (ppm) = 2.18 (t, 4*J* = 2.7 Hz, 1H), 2.56 – 2.60 (m, 2H), 2.72 (s, 3H), 4.14 – 4.36 (m, 2H, H-8) 4.77 (d, 3*J* = 11.8 Hz, 1H), 8.06 (s, 1H).

**13C NMR** (75 MHz, CDCl3) δ (ppm) = 14.6, 25.4, 50.7, 69.0, 72.3, 78.5, 132.7, 140.2, 152.1.

**HR-MS** (ESI): *m/z* = calc. [M+H]+: 210.0878, found: 210.0874.

#### **Metro-P3 (2-methyl-5-nitro-1-((prop-2-yn-1-yloxy)methyl)-1H-imidazole)**

To a suspension of (2-methyl-5-nitro-*1H*-imidazol-1-yl)methanol (250 mg, 1.59 mmol, 1.00 eq.) and Cs2CO3 (1.20 g, 3.91 mmol, 2.30 eq.) in THF (10 mL) is added propargyl bromide solution (80 % in toluene, 0.40 mL, 3.66 mmol, 1.20 eq.) and heated to 70 °C for 96 h. The reaction mixture is cooled to room temperature and the solvent is removed *in vacuo*. The crude product is further purified performing column chromatography (hexane/EtOAc 1:1) and high-performance liquid chromatography (HPLC) to obtain 136.5 mg of the desired probe **Metro-P3** (0.70 mmol, 44 %) as a white solid.

**TLC:** *Rf*= 0.36 (EtOAc) [UV].

**1H NMR** (300 MHz, CDCl3) δ (ppm) = 2.51 (t, 4*J* = 2.4 Hz, 1H), 4.05 (s, 3H), 4.25 (d, 4*J* = 2.4 Hz, 2H), 4.79 (s, 2H), 7.97 (s, 1H).

**13C NMR** (75 MHz, CDCl3) δ (ppm) = 34.2, 58.5, 63.2, 76.2, 78.2, 129.6, 147.8.

**HR-MS** (ESI): *m/z* = calc. [M+H]+: 196.0717, found: 196.0715.

Analytical data is in accordance with literature.[7](#_ENREF_7)

#### **Metro-P4 (2-methyl-5-nitro-1-(prop-2-yn-1-yl)-1H-imidazole)**

The **Metro-P4** was synthesized *via* a SN2 substitution reaction starting from the nitroimidazole compound **3** according to the literature procedure by *Bejot et al*.[8](#_ENREF_8)

To a suspension of 2-methyl-4/5-nitro-*1H*-imidazole **3** (50.0 mg, 0.39 mmol, 1.00 eq.) and K2CO3 in DMF (2 mL) is added propargyl bromide solution (80 % in toluene, 0.05 mL, 0.47 mmol, 1.20 eq.) and the mixture is heated to 50 °C for 5 h and then stirred over night at room temperature. The reaction is quenched with *d*H2O (5 mL) and diluted with EtOAc (20 mL). The organic phase is separated, and the aqueous phase is extracted with EtOAc (3 × 20 mL). Combined organic layers are washed with brine (20 mL), dried over anhydrous Na2SO4 and the solvent is evaporated *in vacuo*. The crude product is further purified performing column chromatography (hexane/EtOAc 1:1) to obtain 49.3 mg (0.30 mmol, 76 %) of the probe **Metro-P4** as a mixture of 4- and 5-nitroimidazole regioisomers (80:20) as a white solid.

**Rf** (hexane/EtOAc 1:1) = 0.36 [UV].

**1H NMR** (400 MHz, CDCl3) δ (ppm) = 2.40 (t, 4*J* = 2.5 Hz, 1H), 2.49 (s, 3H), 2.56 (s, 3H), 2.60 (t, 4*J* = 2.6 Hz, 1H), 4.70 (d, 4*J* = 2.6 Hz, 2H), 5.15 (d, 4*J* = 2.5 Hz, 2H), 7.78 (s, 1H), 7.86 (s, 1H).

**13C NMR** (101 MHz, CDCl3) δ (ppm) = 13.50, 36.94, 76.49, 76.84, 117.61, 119.54, 144.54.

**LR-MS**: *m/z* = calc. [M+H]+: 166.06, found: 166.11.

#### **MF-01** (1-(2-Methoxyethyl)-2-methyl-5-nitro-1H-imidazole)

Cs2CO3 (1.71 g, 5.28 mmol, 4.50 eq.) is added to a metronidazole (200 mg, 1.17 mmol, 1.00 eq.) dissolved in THF (10 mL) and stirred at room temperature for 30 min. Methyl iodide (582 µL, 1.33 g, 9.36 mmol, 8.00 eq.) is added and the solution is stirred at room temperature for 21 h. The solvent is removed under reduced pressure, the remaining residue is dissolved in EtOAc and subsequently filtered. The crude product is purified by column chromatography (hexane/EtOAc = 1/1) and HPLC to afford **MF-01** (28.4 mg, 153 µmol, 13 %) as a white solid.

**TLC**: *Rf* = 0.35 (EtOAc) [UV].

**HPLC:** *t*R = 5.0 min

**1H-NMR** (400 MHz, CDCl3): δ [ppm] = 2.75 (s, 3H), 3.30 (s, 3H), 3.73 (t, *3J* = 4.8 Hz, 2H), 4.59 (t, *3J* = 4.8 Hz, 2H), 8.07 (s, 1H).

**13C-NMR** (101 MHz, CDCl3): δ [ppm] = 13.6, 47.6, 59.4, 70.7, 126.9, 136.6, 150.8.

**HR-MS** (ESI): *m/z* = calc. [M+H]+: 186.0873, found: 186.0871.

#### **MF-02** (2-(Methoxymethyl)-1-methyl-5-nitro-1H-imidazole)

Cs2CO3 (1.04 g, 3.18 mmol, 2.50 eq.) is added to 1‑methyl‑5‑nitro‑*1H*‑imidazol‑2‑yl)methanol (200 mg, 1.27 mmol, 1.00 eq.) dissolved in THF (10 mL) and stirred at room temperature for 30 min. Methyl iodide (560 µL, 1.26 g, 8.89 mmol, 7.00 eq.) is added and the solution is stirred at room temperature for 21 h. The solvent is removed under reduced pressure, the remaining residue is dissolved in EtOAc and then filtered. The crude product is purified by column chromatography (hexane/EtOAc = 1/1) and HPLC to afford **MF-02** (84.8 mg, 495 µmol, 39 %) as a white solid.

**TLC**: *Rf* = 0.48 (EtOAc) [UV].

**HPLC:** *t*R = 6.6 min.

**1H-NMR** (400 MHz, CDCl3): δ [ppm] = 3.41 (s, 3H), 4.04 (s, 3H), 4.65 (s, 2H), 7.98 (s, 1H).

**13C-NMR** (101 MHz, CDCl3): δ [ppm] = 34.4, 58.9, 66.3, 130.2, 148.5, 157.3.

**MF-03** (1-(2-ethoxyethyl)-2-methyl-5-nitro-1H-imidazole)

Metronidazole (200 mg, 1.17 mmol, 1.00 eq.) and Cs2CO3 (457 mg, 1.40 mmol, 1.20 eq.) are suspended in dry THF (5 mL). Ethyl bromide (0.20 mL, 306 mg, 2.80 mmol, 2.40 eq.) is slowly added to the suspension and heated to reflux. Over a period of 60 h, ethyl bromide (612 mg, 5.60 mmol, 4.80 eq.) and caesium carbonate (380 mg, 1.16 mmol, 1.00 eq.) are additionally added. The suspension is quenched with water (20 mL). The reaction mixture is extracted with ethyl acetate (3 × 20 mL). The combined organic layers are washed with brine (20 mL), dried over anhydrous Na2SO4 and the solvent is evaporated *in vacuo.* The crude product is further purified performing column chromatography (hexane/EtOAc = 1:5) to obtain an orange-brown solid (37.8 mg, 0.19 mmol, 16 %).

**TLC**: *Rf* = 0.30 (hexane/EtOAc 1:5) [UV].

**1H-NMR** (400 MHz, CDCl3): δ [ppm] = 1.10 (t, *3J* = 7.0 Hz, 3H), 2.58 (s, 3H), 3.41 (q, *3J*  = 7.0 Hz, 2H), 3.73 (t, *3J* = 5.0 Hz, 2H), 4.51 (t, *3J* = 5.0 Hz, 2H), 7.98 (s, 1H).

**13C-NMR** (100 MHz, CDCl3): δ [ppm] = 14.4, 15.1, 47.1, 67.1, 69.1, 131.6, 138.4, 151.7.

**HR-MS** (ESI): *m/z* = calc. [M+H]+: 200.1030, found: 200.1029.

#### **MF-04** 2-(Ethoxymethyl)-1-methyl-5-nitro-1H-imidazole

Cs2CO3 (2.49 g, 7.64 mmol, 4.00 eq.) and tetrabutylammonium iodide (TBAI, 317 mg, 0.45 mol %) are added to (1‑methyl‑5‑nitro‑*1H*‑imidazol‑2‑yl)methanol (300 mg, 1.91 mmol, 1.00 eq.) dissolved in THF (10 mL) and stirred at room temperature for 30 min. Ethyl bromide (0.56 mL, 7.64 mmol, 4.00 eq.) is added and the solution is stirred at reflux for 21 h. The reaction mixture is filtered, and the solvent is evaporated *in vacuo*. The crude product is dissolved in EtOAc, filtered, and purified by column chromatography (hexane/EtOAc = 1:2) followed by HPLC purification. **MF-04** is obtained pure as a yellow oil (80.0 mg, 1.11 mmol, 58 %).

**TLC**: *Rf* = 0.44 (hexane/EtOAc 2:1) [UV].

**HPLC:** *t*R = 7.7 min

**1H NMR** (400 MHz, CDCl3) δ [ppm] = 1.22 (t, *3J*  = 7.1 Hz, 3H), 3.57 (q, *3J* = 7.1 Hz, 2H), 4.04 (s, 3H), 4.66 (s, 2H), 7.95 (s, 1H).

**13C NMR** (100 MHz, CDCl3) δ = 15.1, 33.9, 64.7, 66.8, 130.8, 139.7, 149.0.

**HR-MS** (ESI): *m/z* = calc. [M+H]+: 186.0873, found: 186.0872.

**MF-05** (2-methyl-5-nitro-1-(2-propoxyethyl)-*1H*-imidazole)

Cs2CO3 (1.14 g, 3.51 mmol, 4.99 eq.) is added to metronidazole (150 mg, 876 µmol, 1.00 eq.) dissolved in THF (10 mL) and stirred at room temperature for 30 min. Propyl iodide (0.85 mL, 8.76 mmol, 10.0 eq.) is added and the solution is stirred at reflux overnight. The reaction mixture is filtered, and the solvent is evaporated *in vacuo*. The crude product is purified by column chromatography (hexane/EtOAc = 1:2) to afford **MF-05** (38.5 mg, 184 µmol, 21 %) pure as a yellow oil.

**TLC**: *Rf* = 0.23 (hexane/EtOAc 1:2) [UV].

**1H NMR** (400 MHz, CDCl3) δ [ppm] = 0.83 (t, 3*J* = 7.1 Hz, 3H), 1.49 (ps, 3*J* = 7.1 Hz, 2H), 2.58 (s, 3H), 3.31 (t, 3*J* = 7.1 Hz, 2H), 3.73 (t, 3*J* = 4.5 Hz, 2H), 4.52 (t, 3*J* = 4.5 Hz, 2H), 7.99 (s, 1H).

**13C NMR** (100 MHz, CDCl3) δ [ppm] = 10.6, 14.4, 22.9, 47.1, 69.3, 73.4, 131.9, 138.3, 151.6.

**HR-MS** (ESI): *m/z* = calc. [M+H]+: 214.1186, found: 214.1184.

**MF-06** (1-methyl-5-nitro-2-(propoxymethyl)-1*H*-imidazole)

Cs2CO3 (3.32 g, 7.64 mmol, 4.00 eq.) is added to (1‑methyl‑5‑nitro‑*1H*‑imidazol‑2‑yl)methanol 400 mg, 2.55 mmol, 1.00 eq.) dissolved in THF (10 mL) and stirred at room temperature for 30 min. Propyl iodide (1.59 mL, 15.3 mmol, 6.00 eq.) is added and the solution is stirred at reflux overnight. The reaction mixture is filtered, and the solvent is evaporated *in vacuo*. The crude product is purified by column chromatography (hexane/EtOAc = 1:2) to obtain **MF-06** pure as a yellow oil (57.6 mg, 281 µmol, 11 %).

**TLC**: *Rf* = 0.57 (hexane/EtOAc 1:3) [UV].

**1H NMR** (400 MHz, CDCl3) δ [ppm] = 0.91 (t, *3J* = 7.2 Hz, 3H), 1.61 (ps, *3J* = 7.2 Hz, 2H), 3.44 (t, *3J* = 7.2 Hz, 2H), 4.02 (s, 3H), 4.62 (s, 2H), 7.93 (s, 1H).

**13C NMR** (100 MHz, CDCl3) δ [ppm] = 10.6, 22.9, 33.8, 65.3, 73.0, 131.6, 149.2.

**HR-MS** (ESI): *m/z* = calc. [M+H]+: 200.1030, found: 200.1028.

**MF-07** (1-(2-(allyloxy)ethyl) -2-methyl-5-nitro-1H-imidazole)

Metronidazole (200 mg, 1.17 mmol, 1.00 eq.) and Cs2CO3 (762 mg, 2.34 mmol, 2.00 eq.) are suspended in dry THF (10 mL). To this suspension, allyl bromide (0.30 mL, 2.80 mmol, 3.00 eq.) is slowly added and heated to 70°C. After 23 h, the suspension is quenched with addition of water (20 mL). The reaction mixture is extracted with ethyl acetate (3 × 20 mL). The combined organic layers are washed with brine (20 mL), dried over anhydrous Na2SO4 and the solvent is evaporated *in vacuo.* The crude product is further purified performing column chromatography (hexane/EtOAc = 1:5) to obtain **MF-07** pure as a gold-brown solid (74.5 mg, 0.35 mmol, 30 %).

**TLC**: *Rf* = 0.40 (hexane/EtOAc 1:5) [UV].

**1H NMR** (400 MHz, CDCl3) δ [ppm] = 2.57 (d, *3J* = 2.6 Hz, 3H), 3.75 (t, *3J* = 5.1 Hz, 2H), 3.84 – 3.93 (m, 2H), 4.52 (t, *3J* = 5.1 Hz, 2H), 5.09 – 5.20 (m, 2H), 5.66 – 5.81 (m, 1H), 7.98 (d, *3J* = 2.6 Hz, 1H).

**13C-NMR** (100 MHz, CDCl3): δ [ppm] = 14.5, 46.9, 68.7, 72.3, 117.7, 132.0, 133.8, 138.4, 151.7.

**HR-MS** (ESI): *m/z* = calc. [M+H]+: 212.1030, found: 212.1030.

**MF-08** (2-((allyloxy)methyl)-1-methyl-5-nitro-1*H*-imidazole)

Cs2CO3 (1.56 g, 4.77 mmol, 3.00 eq.) is added to (1‑methyl‑5‑nitro‑*1H*‑imidazol‑2‑yl)methanol 250 mg, 1.59 mmol, 1.00 eq.) dissolved in THF (12 mL) and stirred at room temperature for 30 min. Allyl iodide (0.44 mL, 4.77 mmol, 3.00 eq.) is added and the solution is stirred at reflux for 3 days. The reaction mixture is filtered, and and the solvent is evaporated *in vacuo*. The crude product is purified by column chromatography (hexane/EtOAc = 1:1) and HPLC to obtain **MF-08** pure as a colourless oil (138 mg, 700 µmol, 44 %).

**TLC**: *Rf* = 0.40 (hexane/EtOAc 1:1) [UV].

**1H NMR** (400 MHz, CDCl3) δ [ppm] = 4.02 – 4.06 (m, 5H, H-6), 4.66 (s, 2H), 5.20 – 5.37 (m, 2H), 5.77 – 5.96 (m, 1H), 7.95 (s, 1H).

**13C NMR** (100 MHz, CDCl3) δ [ppm] = 33.9, 64.1, 72.0, 118.8, 131.0, 133.3, 139.7, 148.8.

**HR-MS** (ESI): *m/z* = calc. [M+H]+: 198.0873, found: 198.0872.

**MF-09** (2-methyl-1-(2-((3-methylbut-2-en-1-yl)oxy)ethyl)-5-nitro-1H-imidazole)

Metronidazole (200 mg, 1.17 mmol, 1.00 eq.) and Cs2CO3 (762 mg, 2.34 mmol, 2.00 eq.) are suspended in dry THF (9 mL). 3,3-dimethylallyl bromide (0.40 mL, 3.51 mmol, 3.00 eq.) is slowly added to the reaction mixture and heated to reflux for 18 h. The suspension is quenched with water (20 mL) and extracted with ethyl acetate (3 × 20 mL). The combined organic layers are washed with brine (20 mL), dried over anhydrous Na2SO4 and the solvent is evaporated *in vacuo.* The crude product is further purified performing column chromatography (hexane/EtOAc = 1:5) and HPLC to obtain **MF-09** as a white solid (29.0 mg, 0.12 mmol, 10 %).

**TLC**: *Rf* = 0.42 (hexane/EtOAc 1:5) [UV].

**1H-NMR** (400 MHz, CDCl3): δ [ppm] = 1.59 (d, 3*J* = 1.3 Hz, 3H), 1.70 (d, 3*J* = 1.4 Hz, 6H), 1.76 (d, 3*J* = 1.3 Hz, 3H), 2.52 (s, 3H), 2.62 (s, 3H), 3.72 (t, 3*J* = 4.9 Hz, 2H), 3.88 (d, 3*J* = 6.9 Hz, 2H), 4.47 (t, 3*J* = 4.3 Hz, 2H), 4.51 (t, 3*J* = 4.9 Hz, 2H), 4.56 – 4.63 (m, 4H), 5.05 – 5.16 (m, 1H), 5.25 – 5.40 (m, 1H), 7.97 (s, 1H), 8.00 (s, 1H).

**13C-NMR** (100 MHz, CDCl3): δ [ppm] = 14.1, 14.2, 18.0, 18.1, 25.7, 25.8, 45.4, 47.2, 65.3, 65.6, 67.7, 67.8, 117.5, 120.0, 130.1, 132.6, 138.0, 140.9, 151.1, 154.7.

**HR-MS** (ESI): *m/z* = calc. [M+H]+: 240.1343, found: 240.1343.

**MF-10** (1-butyl-2-methyl-5-nitro-1H-imidazole)

1-Brombutane (0.68 mL, 6.29 mmol, 4.00 eq.) is added to a solution of 2-methyl-4(5)-nitroimidazole (200 mg, 1.57 mmol, 1.00 eq.) and Na2CO3 (334 mg, 3.15 mmol, 2.00 eq.) in DMF (10 mL) and heated to 60°C overnight. After cooling to room temperature, the reaction mixture is filtered. The solvent is removed under reduced pressure. After purification *via* column chromatography (hexane/EtOAc, 1:1), the addition of water causes a solid to precipitate, which was dried under vacuum to yield 206 mg (70.7 mmol, 71%) **MF-10** as an off-white solid.

**TLC** *Rf* = 0.33 (hexane/EtOAc, 1:1) [UV].

**1H-NMR** (400 MHz, CDCl3): δ [ppm] = 1.00 – 0.96 (t, 3H, 3*J* = 7.34 Hz), 1.43 – 1.34 (m, 2H), 1.81 – 1.74 (m, 2H), 2.43 (s, 3H), 3.91‑3.87 (t, 2H, 3*J* = 7.34 Hz), 7.67 (s, 1H).

**13C-NMR** (100 MHz, CDCl3): δ [ppm] = 13.24, 13.62, 19.81, 32.41, 47.11, 119.49.

**HRMS** (ESI) *m/z* = calc. [M+H]+: 184.10807 found: 184.10803.

**MF-11** (1-pentyl-2-methyl-5-nitro-1*H*-imidazole)

1-Brompentane (0.79 ml, 6.29 mmol, 2.00 eq.) is added to a solution of 2-Methyl-4(5)-nitroimidazole (400 mg, 3.15 mmol, 1.00 eq.) and Na2CO3 (1.33 g, 12.6 mmol, 4.00 eq.) in DMF (10 mL) and heated to 60°C for 4 h. After cooling to room temperature, the reaction mixture is filtered. The solvent was removed under reduced pressure. After purification *via* column chromatography (hexane/EtOAc, 1:6), the resulting oil is crystallized to yield 161 mg (0.81 mmol, 26%) **MF-11** as white crystals.

**TLC** *Rf* = 0.40 (hexane/EtOAc, 1:6) [UV].

**1H-NMR** (400 MHz, CDCl3): δ [ppm] = 0.92 (t, 3 H, 3*J* = 7.05 Hz), 1.41 – 1.29 (m, 4 H), 1.83 – 1.75 (m, 2 H), 2.42 (s, 3 H), 3.89 (t, 2 H, 3*J* = 7.33 Hz), 7.67 (s, 3 H).

**13C-NMR** (100 MHz, CDCl3): δ [ppm] = 13.26, 13.94, 22.28, 28.67, 30.13, 47.38, 119.47,144.67.

**HRMS** (ESI) *m/z* = calc. [M+H]+: 198.12367 found: 198.12364.

## Redox potential measurements

Cyclic voltammetry measurements were carried out with a BioLogicSP200 potentiostat with the EC-Lab software. Glassy carbon disk electrodes (3 mm diameter, PalmSens,Houten, The Netherlands) were used as working and counter electrodes. Ag/AgCl (1 M KCl) was used as a reference electrode separated via a Vycor3535 frit (AdvancedGlass & Ceramics, Holden, MA). Measurements were performed in a five-neck glass cell under argon atmosphere with respective nitroimidazole compounds (cfinal = 1 mM) in deoxygenated SSC buffer[9](#_ENREF_9) (150 mM NaCl, 15 mM sodium citrate, pH = 7.0) with a scan rate of 100 mV/s, unless noted otherwise. Cyclic voltammograms are shown against E(Ag/AgCl). Redox potentials are reported with reference to the normal hydrogen electrode (NHE): E(Ag/AgCl;1 M KCl) = 236 mV vs NHE. E = potential.

## Media, Reagents and Buffers for Bacterial Growth

Wilkins-Chalgren anaerobe agar (WC) and brain heart infusion broth (BHI) were purchased from Oxoid (Germany), *Helicobacter pylori* selective supplement (DENT) (with Vancomycin 5.0 mg, Trimethoprim 2.5 mg Cefsulodin 2.5 mg, Amphotericin B 2.5 mg) was purchased from Oxoid (Germany), Penicillin-Streptomycin (10.000 U/ml) was purchased from Gibco (USA).

LB medium: Peptone (10 g), NaCl (5 g), yeast extract (5 g) in 1 L ddH2O, pH = 7.5; B medium: Peptone (10 g), NaCl (5 g), yeast extract (5 g), K2PO4 (1 g) in 1 L ddH2O, pH = 7.5; BHI medium: 7.5 g brain infusion, 10 g peptone, 10 g heart infusion, 5 g NaCl, 2.5 g Na2HPO4, 2 g glucose in 1 L ddH2O, pH = 7.4

AAM medium: brain heart infusion (BHI) (18.5 g/L), yeast Extract (5 g/L), trypticase soy Broth (15 g/L), K2HPO4 (2.5 g/L), D-glucose (5 g/L), hemin (1mg/L), Na2CO3 (0.4 g/L), cysteine hydrochloride (0.5 mg/L), menadione (5 mg/L), 3% (v/v) FCS (heat inactivated).

## Bacterial Strains and Plasmids

*Bacterial Strains*

*C. difficile* (DSM 27543), *Bacteroides caecimuris* (DSM 26085), *Muribaculum intestinale* (DSM 28989)*, Enterococcus faecalis (DSM 32036), Bifidobacterium animalis (DSM 26074)* were bought from Deutsche Sammlung von Mikroorganismen und Zellkulturen DSMZ, Germany. *H. pylori* strains *(*26695, PMSS1, SS1) were kindly provided by Prof. Markus Gerhard. All other commercially available strains were bought from American Type Culture Collection ATCC, USA or Deutsche Sammlung von Mikroorganismen und Zellkulturen DSMZ, Germany. All bacteria classified within Bio/S2 are handled either under HeraSafe KS fumehoods (*Thermo Fisher Scientific*) or within an anaerobic chamber (*Whitley* DG250 anaerobic working station).

*E. coli* strains used within this work (BL21(DE3), Top10 and XL1Blue, DH5α, MM28) were cultivated in LB medium (37°C, 200 rpm) and supplemented with respective antibiotics if indicated. *S. aureus* strain (NCTC 8325) was cultivated aerobically in B medium (37°C, 200 rpm). *H. pylori* strains (26695, 26695 Δ*tpx*, PMSS1, SS1) were cultured on Wilkins-Chalgren sheep blood (10%) agar plates (WC) that were supplemented with 1% *Helicobacter pylori* selective supplement (DENT) and incubated at 37 °C under microaerophilic* conditions. The broth cultures were prepared by inoculating BHI + 10 % FCS medium with *H. pylori* colonies and then incubated for at least 24 h (37 °C, 140 rpm, microaerophilic) until stationary phase is reached. For growth curve determination, the bacterial growth is followed time-dependently *via* OD600 measurements. Growth of *H. pylori* is additionally confirmed *via* Stuart’s urease test (20 g/L urea, 9.5 g/L Na2HPO4, 9.1 g/L K2HPO4, 0.1 g/L yeast extract, 0.01 g/L phenol red, pH = 6.8). *C. difficile* (DSM 27543) was cultured in BHI medium supplemented with 5 g/L yeast extract, 0.1 % (w/v) *L*-cysteine, 1 mg/L resazurine in an anaerobic** chamber (*Whitley* DG250 anaerobic working station). Anaerobic bacteria isolated from the murine gut including *Bacteroides caecimuris* (DSM 26085), *Muribaculum intestinale* (DSM 28989)*, Enterococcus faecalis (DSM 32036), Bifidobacterium animalis (DSM 26074)* were cultured in AAM medium in an anaerobic** chamber.

* Microaerophilic: 5 % CO2, 10 % O2 and 85 % N2). ** Anaerobic: 5 % H2, 10 % CO2 and 85 % N2.

*Plasmids*

Plasmids and their characteristics used for the methods in the following sections including protein purification of HpTpx, HpTpx point mutants, HpGroEL and Δ*tpx* knockout mutants are summarized in **Table S6**.

**Table S 7**: Plasmids used within this work.

| Plasmid | Description | Source |
| --- | --- | --- |
| pDONR201 | Gateway Donor vector, attP1, attP2, KanR, pUC ori, CmR, ccdB | *Invitrogen* |
| pET-55-dest-HpTpx  pET-55-dest-HpTpx-C60A  pET-55-dest-HpTpx-C94A  pET-55-dest-HpTpx-C60A-C94A | attB1, attB2, AmpR, lacI, pUC ori, T7  promotor, Strep-tag II sequence (Nterminal),  HpTpx cloned into attR1 and  attR2 sites of pET-55-DEST, expression  clone | This study |
| pET-28a(+) | KanR, lacI, pUC ori, T7 promoter, MCS | *Twist Bioscience* |
| pET-28a(+)-HpGroEL | KanR, lacI, pUC ori, T7 promoter, HpGroEL with TEV cleavage site an C-terminal His tag cloned into pET28a(+) using NcoI and XhoI restriction sites | This study |
| pOND708 | derivative of pBlu-SK-alt with homologous regions to *hydA* and *mdaB* flanking *rpsL-cat* | Debowski et al[10](#_ENREF_10) |
| pTpx_rpsL-cat | derivative of pOND708 with homologous regions to the upstream and downstream DNA sequence of *tpx* gene flanking *rpsL-cat* | This study |

## Cell culture

Dulbecco's Modified Eagle Medium (w: 4.5 g/L Glucose, w: L-Glutamine, w/o: Sodium pyruvate, w: 3.7 g/L NaHCO3 (DMEM) was purchased from *PAN Biotech*, HG-DMEM (High glucose Dulbecco’s Modified Eagle’s Medium), fetal calves serum and PBS were purchased from *Sigma-Aldrich*. Trypsin-EDTA (0.25 %) was purchased from *Gibco.* Cells were incubated at 37 °C and 5 % CO2 (Autoflow, Nuaire). The sterile workflow was performed under a laminar flow (HeraSafe KS, *Thermo Scientific*) equipped with a vacuum pump (BVC 21, *Vacuumbrand*).

HeLa cells (*Homo sapiens*, cervix carcinoma) and HepG2 (*Homo sapiens*, hepatocellular carcinoma) were grown in HG-DMEM medium supplemented with 10 % (v/v) FCS (heat inactivated, *Sigma*) and 2 mM L‑glutamine (*Sigma*). Gastric adenocarcinoma cells (AGS) were cultured in a cell culture flask using DMEM supplemented with 10% (v/v) FCS and 1% (v/v) Penicillin-Streptomycin (10.000 U/ml) at 37°C (5 % CO2). For determining the number of cells, the suspension was mixed with trypan blue (1:1) and cells were counted in a Neubauer chamber under a Primo Vert microscope (*Zeiss*). Cell culture was checked daily, and polymerase chain reaction testing for *Mycoplasma infection* was conducted before each experiment.

## Cloning

*Primers*

**Table S 8**: Primer sequences (except Δ*tpx* primers, for this, see ‘generation of HpTpx Δ*tpx* knockout mutant’) used in the present work.

| **Primer** | **Gene** | **5’-3’ Sequence** | **Supplier** |
| --- | --- | --- | --- |
| Gateway HpTpx FWD | *tpx* | ggggacaagtttgtacaaaaaagcaggctttcaaaaagttacttttaaagaagaaac | *Sigma* |
| Gateway HpTpx REV | *tpx* | ggggaccactttgtacaagaaagctgggtgctatttcaacacttttaaaagcg | *Sigma* |
| HpTpx C60A  FWD | *tpx* | tagtttaaccggatcggtt**gc**tttgctccaagccaaacac | *Sigma* |
| HpTpx C60A  REV | *tpx* | gtgtttggcttggagcaaa**gc**aaccgatccggttaaacta | *Sigma* |
| HpTpx C94A  FWD | *tpx* | tgcctttttctcaagggcaaatt**gc**cggcgctgaagg | *Sigma* |
| HpTpx C94A  REV | *tpx* | ccttcagcgccg**gc**aatttgcccttgagaaaaaggca | *Sigma* |
| HpGroEL insert | *groEL* | atggccaaagagatcaagttctctgatagcgcgcgtaaccttttgtttgagggtgttcgacaactgcacgatgcggttaaagtaaccatggggccccggggccgtaatgttctgattcagaagtcctacggagcacctagcattaccaaagatggcgtgagtgtggcgaaagaaattgaattatcctgcccggtagcaaacatgggagcccagctggtaaaagaagttgcgtccaaaactgccgacgcagccggcgatggtaccactacagcgactgtgcttgcgtattccatatttaaggaagggctcagaaatatcaccgctggtgcgaatccaatcgaggtgaagcgcggtatggataaggccgcagaggcaatcattaacgagctgaagaaagcctcaaaaaaggttggtggtaaagaagaaatcacacaggtagcaaccatatctgcgaactcagatcataatattgggaagttaatcgcggatgctatggaaaaggtcggcaaggacggagttattaccgttgaggaagccaagggtattgaggatgagttggatgttgttgaaggcatgcagtttgaccgggggtacttgtcaccatactttgtaaccaatgcagaaaaaatgactgcgcagctggataatgcgtatatcttgctgactgacaaaaaaatcagctcaatgaaagacatactgcctctcttggagaaaaccatgaaagaaggtaagcctctgttaattatcgcagaagatatcgaaggcgaagctctcacgaccctggtagtcaataagttacggggcgtcttaaacatcgcagctgtaaaggcgccagggtttggtgatcgtcgtaaagagatgctgaaagatattgcaatactgaccggcgggcaagttatttccgaggagctggggctcagtctggaaaacgccgaagttgaatttctggggaaggccggtagaatcgtgatcgataaagataataccaccatcgtcgatggcaaaggtcattctcacgatgtgaaagaccgggtcgctcagattaagacgcagatagcatcaacaacgagtgactatgacaaagagaaacttcaggagcgactcgcgaaactgtcaggcggcgttgctgtcatcaaagtcggcgctgccagcgaagtggagatgaaagaaaaaaaggatcgcgtcgatgatgctttatctgcaacaaaagctgctgtggaagaaggcatagtgataggtggtggagcagcgctcatacgagcggctcagaaggtacatttgaacttacatgatgacgaaaaagtgggttatgaaatcataatgcgcgcaataaaagccccgctggcgcagattgcgatcaacgcaggttatgacggtggtgttgtcgtgaatgaagtggaaaaacacgagggccactttggtttcaatgcatcaaacggcaaatatgtcgacatgttcaaagaagggattattgatccgttaaaagtggagcgaattgcactgcagaatgctgtgtccgtttcgagtctgttgctgactacagaagctaccgtccatgaaataaaagaagaaaaagcggcccctgcaatgccggatatgggtggtatgggcggcatgggtggcatgggtggcatgatggaaaatttatatttccagggg | *TwistBioscience* |

#### Cloning of recombinant HpGroEL in E. coli

pET-28a(+) plasmids with kanamycin resistance cassette encoding the gene *groEL* (Uniprot ID: P42383) with a TEV cleavage site before the C-terminal His tag were purchased from *TwistBioscience*. HpGroEl was ligated into pET-28a(+) using NcoI and XhoI restriction sites. Sequence of the insert is shown in **Table S7** and was verified by DNA sequencing (*Azenta*). The plasmid was transformed into chemically competent *E. coli* BL21 (DE3) cells for protein expression and purification.

#### Cloning of recombinant HpTpx in E. coli

gDNA extraction of *H. pylori* 26695 was performed with *GeneRabbit* DNA extraction Kit*. H. pylori tpx* gene (Uniprot ID: O25151) for recombinant protein expression in *E. coli* was amplified by polymerase chain reaction (PCR) according to **Table S8**. The PCR mixture contained 10 µL 5x Phusion HF buffer (NEB), 1 µL dNTP mix (10 mM), 1 µL forward primer (10 µM), 1 µL reverse primer (10 µM), 1 µL *H. pylori* gDNA (25 – 50 ng), 1.5 µL DMSO and 1 µL Phusion DNA Polymerase (NEB) and filled up to 50 µL with nuclease-free water. After verification of the reactions by an 1 % agarose gel, PCR Products were purified using a E.Z.N.A.® MicroElute Cycle Pure Kit (*Omega*) according to the manufacturers protocol.

**Table S 9**: Cycling parameters for tpx gene amplification PCR reactions.

| Time | Temperature | Cycle |
| --- | --- | --- |
| 30 s | 98 °C |  |
| 10 s | 95 °C |  |
| 30s | 50 °C | 35 × |
| 15 s | 72 °C |  |
| 10 min | 72 °C |  |
| ∞ | 4 °C |  |

Cloning of N-terminal Strep-tagged tpx (HpTpx) was performed using the *Invitrogen* Gateway® cloning system with pDONR™201Kan (*Invitrogen*) as the donor vector and pET-55-DEST™Amp (*Invitrogen*) as the destination vectors. Protocols were adopted from *Invitrogen* (Thermo Fisher Scientific, "Gateway Cloning Protocols"). BP and LR reactions were transformed into *E. coli* TOP10 cells. After re-isolation of final plasmid DNA with plasmid Miniprep Kit (peqGOLD Plasmid Miniprep Kit II, *VWR* Peqlab) according to the manufacturer’s instructions, correct insertion was checked with Sanger Sequencing (*Azenta*). Isolated plasmid DNA was re-transformed in competent *E. coli* BL21(DE3) cells (*Promega*) as the final expression strain.

#### QuikChange Site Directed Mutagenesis for Generation of HpTpx Point Mutations

Cloning of N-terminal Strep-tagged Hptpx was performed using the *Invitrogen* Gateway Technology as described above. Plasmid DNA of wildtype pET-55-DEST-HpTpx was purified using a plasmid Miniprep Kit (peqGOLD Plasmid Miniprep Kit II, *VWR Peqlab*) according to the manufacturer’s instructions and used as template for single point mutations (C60A, C94A). For double mutations (C60A-C94A), plasmid DNA of pET-55-DEST-HpTpx with single point mutation (C60A) was isolated and used as template for site-directed mutagenesis. Point mutation primers (*Sigma*) were designed based on the HpTpx gene sequence according to the manufacturer’s instructions (*Agilent*). Primer sequences are listed in **Table S6.** QuikChange site directed mutagenesis PCR reactions were performed using PhusionHigh-Fidelity DNA Polymerase (*New England BioLabs*) using the cycle listed below (**Table S9**). The PCR mixture contained 10 µL GC buffer (NEB), 1 µL dNTP mix (10 mM), 1 µL forward primer (10 µM), 1 µL reverse primer (10 µM), 1 µL plasmid template (25 ng), 1.5 µL DMSO and 1 µL Phusion DNA Polymerase (NEB) and 33.5 µL ddH2O.

**Table S 10:** Cycling parameters for QuikChange site-directed mutagenesis PCR reactions.

| Time | Temperature | Cycle |
| --- | --- | --- |
| 3 min | 98 °C |  |
| 45 s | 95 °C |  |
| 30 s | 60 or 68 °C | 35 × |
| 3 min | 72 °C |  |
| 7 min | 72 °C |  |
| ∞ | 4 °C |  |

PCR product was digested with *DpnI* (1 µL CutSmart Buffer, 1 µL DpnI, 8 µL PCR reaction mixture) for 1 h at 37°C and subsequently transformed in *E. coli* XL1 blue cells for nick repair. After re-isolation of plasmid DNA with plasmid Miniprep Kit (peqGOLD Plasmid Miniprep Kit II, *VWR* Peqlab) according to the manufacturer’s instructions, correct insertion of the desired point mutation(s) and overall sequence was checked with Sanger Sequencing (*Azenta*). Isolated plasmid DNA was re-transformed in competent *E. coli* BL21(DE3) cells (*Promega*) as the final expression strain.

#### Generation of H. pylori 26695 ∆tpx mutant

All primers used for generation of *H. pylori* 26695 ∆*tpx* are summarized in **Table S10**.

**Table S 11**: Primer sequences used for generation of tpx knockout mutants (Gibson assembly primers and PCR verification primers).

| **Primer** | **Sequence 5‘🡪3‘** |  |
| --- | --- | --- |
| UF tpx rpsL fwd | **gacggtatcgat**ggtcaatgtaataagcatgc | for Gibson Assembly of pTpx_rpsL-cat |
| UF tpx rpsL rev | **atccatagttata**ggttaaatcctttctaattgaattg |
| rpsL-cat tpx fwd | **aaggatttaacc**tataactatggattaaacacttttttag |
| rpsL-cat tpx rev | **tttaaggatttc**ttcagcaagtcttgtaattc |
| LF tpx rpsL fwd | **aagacttgctgaa**gaaatccttaaaaggagggggc |
| LF tpx rpsL rev | **ggtggcggccgc**cgcgagtccctgaaaccc |
| backbone pOND708 tpx fwd | **tcagggactcgcg**gcggccgccaccgcggtg |
| backbone pOND708 tpx rev | **tattacattgacc**atcgataccgtcgatcgagggggggc |
| rpsL control fwd | ttggtgaacgaatgggaatg | Sequencing,  Verification PCR |
| tpx control fwd | accttagaggctattaagttgctga |
| tpx control rev | tggcgataagattccggacgct |

***Bold:** Overhang for Gibson Assembly

A deletion plasmid (pTpx_rpsL-cat) containing 0.5 – 0.7 kb homologous sequences to the up- and downstream region of the *tpx* gene (HP0927) was generated. Homologous flanks were amplified by PCR using Q5 polymerase (NEB) and primer pairs UF tpx rpsL fwd/rev and LF tpx rpsL fwd/rev. In the deletion plasmid, homologous regions flank a *rpsL-cat* cassette, that was amplified from plasmid pOND708[10](#_ENREF_10) using primers rpsL-cat tpx fwd/rev. Chloramphenicolacetyltransferase (*cat*) confers resistance to chloramphenicol to bacteria that successfully integrated the deletion plasmid and *rpsL* allows for the use of the plasmid in a streptomycin-based counter selection system.[11](#_ENREF_11) In addition, pOND708 was amplified to be used as a plasmid backbone using the primer pair backbone pOND708 tpx fwd/rev. PCR products were purified using Promega ReliaPrep and the plasmid was assembled using the NEB Gibson assembly kit. After transformation into *E. coli* DH5α, correct assembly of pTpx_rpsL-cat was verified by PCR using primers LF tpx rpsL rev /rpsL control fwd and by sequencing using primers LF tpx rpsL rev and UF tpx rpsL fwd. The deletion plasmid was transferred into *H. pylori* 26695 using the natural transformation competence of the bacterium and deletion mutants were selected on chloramphenicol (10 µg/ml) containing WC-DENT blood agar plates. Correct replacement of the *tpx* gene with *rpsL-cat* was verified by PCR using primers tpx control fwd/rev for several clones growing on the plate and the loss of protein expression was additionally proven by full proteome LC-MS/MS analysis (**Figure S18**).


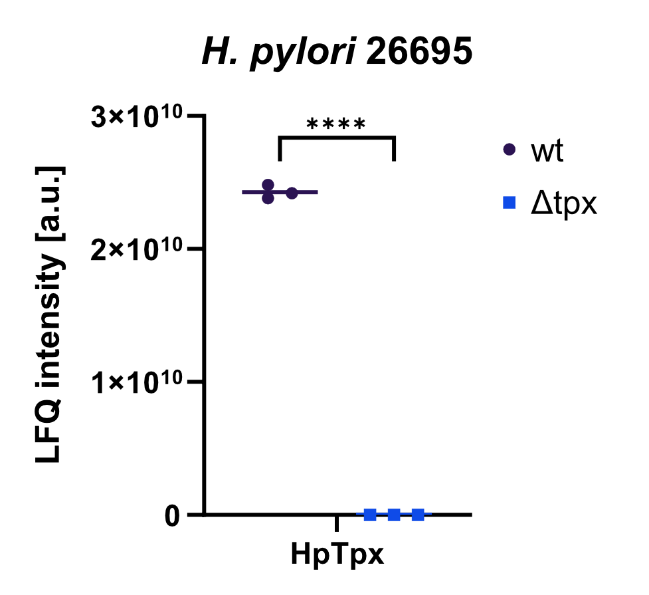


**Figure S 26**: Validation of successful cloning of *H. pylori* 26695 Δ*tpx* mutant exemplarily shown for ‘clone 1’. LFQ intensities of HpTpx (O25151, thiol peroxidase) after full proteome analysis of *H. pylori* 26695 wildtype and Δ*tpx* mutant. Experiment was performed in biological triplicates (n =3). Statistical significance was determined by a two-tailed Student’s t-test. ****: p<0.0001. Result of one picked colony/clone shown.

## Gel-based Activity-based Protein Profiling (ABPP)

*Labeling and Lysis in Bacteria*

*B*acterial overnight cultures were grown to early stationary phase (*H. pylori*: OD600 ≈ 1.0, *S. pseudintermedius*: OD600 ≈ 5.5, *S. schleiferi*: OD600 ≈ 7.0). The cells were harvested (6000 × g, 15 min, r.t.) and washed with PBS once (15 mL, 6000 × g, 15 min, 4 °C). The pellet was resuspended in PBS to obtain a bacterial culture of OD600≈ 40. To 200 µL of OD600 ≈ 40 culture, 2 µL **Metro-P1**, **Metro-P2** or **Metro-P3** probe (100 × stock in DMSO, varying concentrations) or 1 % (v/v) DMSO were added. Samples were incubated at 37 °C (*H. pylori*: 140 rpm, microaerophilic conditions; *S. pseudintermedius, S. schleiferi*: anaerobic conditions) for 2 h and subsequently harvested by centrifugation (6000 × g, 10 min, 4 °C). The supernatant was discarded, and the cell pellet washed twice with 500 µL PBS and resuspended in 200 µL PBS* at 4 °C or in 200 µL 0.4 % SDS-PBS. Cells were either lysed by sonication (4 × 20 s, 75 % intensity with cooling breaks on ice) or *H. pylori* cell pellet was resuspended in RIPA buffer with protease inhibitor (200 µL, 50 mM Tris-Cl, 150 mM NaCl, 1mM EGTA, 1 % Igepal, 0.25 % sodium deoxycholate, pH = 7.4, addition of 1 tablet of protease inhibitor (*Roche* cOmplete Tablets Mini EDTA-free) per 10 mL RIPA buffer), incubated on ice for 5 min followed by sonication for 10 min in a sonication bath (*Bandelin* Sonorex Super RK). Lysate was clarified by centrifugation (21 000 × g, 30 min, 4 °C in case of PBS, r.t. in case of 0.4 % SDS-PBS as SDS precipitates at low temperatures). For competitive labeling experiments, samples are pre-incubated with respective concentrations of parent compound (metronidazole) at 37 °C (140 rpm, microaerophilic) for 2 h prior to addition of probe at defined concentrations.

*In case of PBS: Both cytosolic fraction (supernatant) and membrane fraction (pellet) were used for fluorescence *Click* chemistry. Cytosolic fraction was clicked directly whereas for the membrane fraction, the supernatant was fully removed, and the pellet was washed once with 200 µL PBS prior to resuspension in 200 µL 0.4 % SDS-PBS.

*Labeling and Lysis in HeLa cells*

For gel-based ABPP, HeLa cells were seeded in 6-well plates and grown at 37 °C and 5 % CO2 to 90 % confluency. Before labeling, DMEM medium was fully removed, and cells were washed with PBS (1 ml) once. To each well, 1 µL of **Metro-P1**, **Metro-P2**, **Metro-P3** (1000 × stock compound in DMSO) in 1 mL medium (DMEM + 2 mM *L*-glutamine without FCS) were added and incubated for 1 h at 37 °C (5 % CO2). For control experiments, cells were treated with 0.1 % (v/v) DMSO. After removal of medium and washing with ice-cold PBS (1 mL) cells were lysed by adding 100 µL lysis buffer (50 mM Tris, pH = 7.5, 150 mM NaCl, 1 % (v/v) NP40, 0.1 % (w/v) sodium deoxycholate, 1 mM EDTA) to each well and incubated for 15 min on ice. Afterwards, cells were scraped off wells, transferred into 1.5 mL Eppendorf tubes and centrifuged (21 000 × g, 15 min, 4 °C) before *Click* chemistry was performed.

*Click* conditions: 100µM Rh-N3, 500 µM BTTAA, 1 mM CuSO4, 2 mM NaAsc

The samples were subjected to *Click* reaction by adding 1 µL rhodamine azide (10 mM in DMSO), 5 µL BTTAA (10 mM in DMSO), 2 µL CuSO4 (50 mM in ddH2O) and 2 µL NaAsc (100 mM in ddH2O) to 90 µL of each sample and incubated for 1 h at r.t. *Click* reaction was quenched by adding 500 µL cold acetone (−80 °C), vortexed and stored overnight at −80 °C. Samples were centrifuged (6000 × g, 15 min, r.t.) and supernatant was aspirated. Cell pellet was resuspended in 65 µL PBS and 65 µL 2 × SDS running buffer under mild ultrasound sonication (10 s, 10 %, 5 × cycle) and protein bands were separated using SDS-Page and visualized by fluorescence detection described in ‘SDS-Page’.

## SDS-Page

Stacking gels contained 4% (w/v) acrylamide (in 50 mM Tris, pH = 6.8) and resolving gels consisted of 12.5 or 15% (w/v) acrylamide (in 300 mM Tris, pH = 8.8). The gels were run in a Tris-glycine buffer (25 mM Tris, 192 mM glycine, 0.1% (w/v) SDS, pH = 8.3). Prior to loading on gel, samples were incubated at 96 °C for 5 min. For gel electrophoresis, 25 or 40 µL of each condition were loaded onto the gel. Roti®-Mark STANDARD (RM; *Carl Roth*) or PeqGOLD protein marker I (PM; VWR) and BenchMarkTM Fluorescent protein standard (FM; *Thermo Fisher*) were used as markers to determine the respective protein masses. Gels were run for 2.5 h with 150 V in an EV265 Consort (*Hoefer*). Fluorescence was detected with a Fujifilm LAS-4000 luminescent image analyser with a Fujinon VRF43LMD3 lens and a 575DF20 filter. For determination of relative protein amounts, gels were stained with Coomassie and scanned on a LAS-4000 (*Fujifilm*).

## MS-based ABPP – *In Situ* Labeling

*Labeling and Lysis in H. pylori*

*H. pylori* bacterial cultures (4 × 250 mL) were grown to stationary phase (OD600 ≈ 1.0, 90 h). Cells were harvested (6000 × g, 10 min, 4 °C) and washed with PBS once (15 mL, 6000 × g, 10 min, 4 °C). The pellets were resuspended in PBS to obtain a bacterial culture of OD600≈ 40. To 1 mL of OD600 ≈ 40 culture, 10 µL probe (**Metro-P1**, **Metro-P2** or **Metro-P3**, 100 × stock in DMSO, final conc. 1 µM) or 1 % (v/v) DMSO were added and incubated at 37 °C (140 rpm, microaerophilic conditions) for 2 h and subsequently harvested by centrifugation (6000 × g, 10 min, 4 °C). The supernatant was removed, and cell pellet washed twice with 1 mL PBS prior to resuspension in 1 mL 0.4 % SDS in PBS (*H. pylori*) or 200 µL in lysis buffer (200 µL, PBS, 0.5% SDS, 1% Triton X-100, *S. pseudintermedius, S. schleiferi*). *H. pylori* cells were lysed by sonication (4 × 20 s, 75 % intensity) with cooling breaks on ice, *S. pseudintermedius* and *S. schleiferi* cells were first resuspended by sonication (3 × 10 s, 75 % intensity with cooling breaks on ice) and then lysed using a *Precellys* Homogenizer (3 × 30 s, 30 s break). Lysate was clarified by centrifugation (20 000 × g, 30 min, r.t.). For competitive labeling experiments, 1 mL of OD600 ≈ 40 *H. pylori* 26695 culture was pre-incubated with 100 µM Metronidazole (100 x excess, 100 x stock in DMSO) at 37 °C (140 rpm, microaerophilic conditions) for 2 h before probes (1 µM) were added. Protein concentration of each sample was determined by BCA assay.

*BCA Assay*

Protein concentrations were determined using the Pierce BCA protein assay kit (*Thermo Fisher Scientific*, Pierce Biotechnology). Standard calibration curve (BSA, 0 μg/mL to 400 μg/mL, 50 μL) and lysate samples (diluted 1:10 in 50 μL PBS) were pipetted into a flat bottom 96-well plate in triplicates. 100 μL of the BCA working solution (15 parts reagent 1, 1 part reagent 2) were added to the samples and incubated for 15 min at 60°C prior to measuring the absorption at 492 nm on a Tecan Infinite M200Pro Plate reader. The lysate concentration in bacteria was adjusted to a final protein amount of 250 µg protein in 500 µL (0.5 mg/mL) prior to *Click* chemistry.

*Click Reaction and Protein Washing*

*Click* conditions: 100µM biotin-N3, 500 µM BTTAA, 1 mM CuSO4, 2 mM NaAsc

The samples were subjected to *Click* reaction by adding 5 µL biotin azide (final: 100 µM), 25 µL BTTAA (final: 500 µM), 10 µL CuSO4 (final: 1 mM) and 10 µL NaAsc (final: 2 mM) to a total volume of 500 µL and incubated for 1 h at room temperature. *Click* reaction was quenched by adding 2 mL cold acetone (−80 °C), vortexed and stored overnight at −80 °C. Precipitated proteins were pelletized (SLA3000, 10 000 × g, 15 min, 4 °C), and supernatant was discarded. Protein pellet was washed with 0.5 mL cold methanol (−80 °C) and centrifuged (21 000 × g, 10 min, 4 °C) twice. Finally, protein pellets were resuspended in 500 µL 0.4 % SDS-PBS by sonication (10 s, 10 % intensity).

*Avidin Bead Enrichment and On Bead Digest*

All aqueous solutions were prepared using MS-grade water. Avidin beads (avidin-agarose from egg white, 1.1 mg/mL in aq. glycerol suspension, *Sigma Aldrich*) were carefully resuspended by inversion on an Eppendorf tube wheel at 4 °C and transferred to an Eppendorf tube. The beads were washed with 0.4 % SDS in PBS (3 × 1 mL), centrifuged (400 × g, 3 min, r.t.) and filled to the original level with 0.4 % SDS in PBS. 50 µL of bead suspension were added to each 500 µL sample and incubated for 1 h at r.t. under continuous mixing. The samples were transferred quantitatively onto spin columns (*BioEcho*) and washed as follows: 0.4 % SDS in PBS (3 × 700 µL), 6 M urea in ddH2O (2 × 700 µL) and PBS (3 × 700 µL) and transferred into new 1.5 mL LoBind tubes (*Eppendorf*) with 2 × 100 µL X buffer (7 M urea, 2 M thiourea in 20 mM HEPES, pH = 7.5). Proteins on beads were subsequently reduced with TCEP (final: 5 mM) for 1 h (37 °C, 600 rpm) and alkylated with iodoacetamide (final con. 10 mM) for 30 min (r.t., 600 rpm). The reaction was quenched *via* addition of dithreithiol (DTT, final con. 10 mM) for 30 min (r.t., 600 rpm). 50 mM Triethylammonium bicarbonate (TEAB, 600 µL) was added and the pH value was checked to be ≥ 8.0. Trypsin (1.5 µL, 0.5 µg/µL in 50 mM acetic acid, *Promega*) was added to digest the samples for 16 h (37 °C, 600 rpm) and quenched the next day by acidifying with formic acid (10 µL, final pH ≤ 3.0). The digested samples were centrifuged (13 000 × g, 3 min, r.t.) before proceeding to the desalting step.

*Desalting and Filtration*

Desalting was performed using SepPak® C18 cartridges (50 mg, *Waters*). Prior to desalting, the columns were washed with elution buffer (80 % MeCN, 0.5 % formic acid (FA), 2 × 1 mL) and equilibrated with 0.1 % trifluoroacetic acid (TFA) in ddH20 (3 × 1 mL). The supernatant of each sample was loaded onto the columns and the beads were washed with 0.1 % TFA in ddH20 (1 mL), centrifuged (13 000 × g, 3 min, r.t.), and supernatant loaded once more onto each column before washing with 0.1 % TFA in ddH20 (2 × 1 mL) and 0.5 % FA in ddH20 (500 µL). Peptides were eluted into tubes with elution buffer (80 % MeCN, 0.5 % FA, 1 × 500 µL, 1 × 250 µL) while vacuum was applied during the last step. Samples were evaporated using a speed vac (Concentrator Plus, *Eppendorf*). The dried peptides were dissolved in 40 µL 1 % FA in ddH20, vortexed and sonicated (3 × 5 min). PVDF filters (0.22 µM, *Merck Millipore*) were washed with 300 µL 1 % FA in ddH20 (13 000 × g, 1 min, r.t.). Samples were filtered by centrifugation (13 000 rpm, 1 min, r.t.) and transferred into MS vials (*Thermo Fisher*).

*MS Measurement and Data Analysis*

Samples were analyzed via HPLC-MS/MS using an UltiMate 3000 nano HPLC system (*Dionex*) equipped with Acclaim C18 PepMap100 trap column (75 µm ID × 2 cm, Acclaim, *ThermoFisher*) and Aurora UltimateTM (1st generation, 20 cm nanoflow UHPLC compatible, *ionopticks*) separation columns coupled to a Q Exactive Plus Orbitrap Mass Spectrometer (*Thermo Fisher Scientific*) constantly heated to 40 °C. Samples were loaded onto the trap column and washed with TFA (0.1% in ddH2O). The subsequent separation was carried out with a flow rate of 400 nL/min using buffer A (0.1% FA in ddH20) and buffer B (0.1% FA in acetonitrile). The separation column was heated to 40 °C. The analysis started with washing for 7 min with 5% buffer B for desalting followed by a gradient from 5% to 22% buffer B over 105 min, a second gradient from 22% B to 32% B within 10 min, and a final increase to 90% B in 10 min. Isocratic washing with 90% B was performed for 10 min, then decreased to 5% in 0.1 min and held at 5% for additional 9.9 min for re-equilibration.

The Q Exactive Plus mass spectrometer was run in a TOP10 data-dependent mode. In the orbitrap, full MS scans were collected in a scan range of 300-1500 m/z at a resolution of 140 000 and an AGC target of 3e6 with 80 ms maximum injection time. The TOP12 peaks were selected for MS2 scan with a minimum AGC target of 1e3 and isotope exclusion and dynamic exclusion (exclusion duration: 60 s) enabled. Peaks with unassigned charges or a charge of +1 were excluded. Peptide match was “preferred”. MS2 spectra were collected at a resolution of 17 500 aiming at an AGC target of 1e5 with a maximum injection time of 100 ms. Isolation was conducted in the quadrupole using a window of 1.6 m/z. Fragments were generated using higher-energy collision-induced dissociation (HCD, normalized collision energy: 27%) and finally detected in the orbitrap. The lock-mass ion 445.12002 from ambient air was used for real-time mass calibration on the Q Exactive Plus. Data was acquired using Xcalibur software version 3.1 sp3 and proteomics raw data were analysed using MaxQuant[12](#_ENREF_12) (ver. 1.6.2.10) which uses the Andromeda search engine.[13](#_ENREF_13) Settings were default except for LFQ-quantification and match between runs, which were activated during search.The parameters can be found attached in the appendix. Perseus 2.0.10.0 was used for analysis.[14](#_ENREF_14) Data was filtered as following: Potential contaminants’ were removed as well as ‘reverse peptides’ and ‘only identified by site’. LFQ intensities were log2 transformed. Rows were annotated in groups – DMSO (control) and different probe treatments. Rows were filtered for 2 valid values in at least one group. Missing values were imputed from normal distribution. Annotations derived from data banks (Uniprot[15](#_ENREF_15)) were added. Each condition was performed in biological triplicates (n = 3) and volcano plots were created based on two-sided two sample Student‘s t-tests.

## Full Proteome Analysis

*Sample preparation for H. pylori 26695 Δtpx verification*

For 20 mL of *H. pylori 26695* or *Δtpx,* cultures were inoculated from WC Dent plates and grown in BHI + 10 % FCS (37°C, 140 rpm, microaerophilic conditions) until stationary phase was reached (*H. pylori* growth was followed time-dependently *via* OD600 measurements and confirmed *via Stuart’s* urease test). The cells were harvested (6 000 rpm, 10 min, r.t.), washed with PBS twice (500 µL, 6 000 rpm, 10 min, 4°C) and frozen at −80°C until lysis.

*Lysis and Protein Precipitation*

For lysis, cell pellet was resuspended in RIPA buffer with protease inhibitor (200 µL, 50 mM Tris-Cl, 150 mM NaCl, 1mM EGTA, 1 % Igepal, 0.25 % sodium deoxycholate, pH = 7.4, addition of 1 tablet of protease inhibitor (*Roche* cOmplete Tablets Mini EDTA-free) per 10 mL RIPA buffer), incubated on ice for 5 min followed by sonication for 10 min in a sonication bath (*Bandelin* Sonorex Super RK). Lysate is clarified by centrifugation (21 000 × g, 30 min, 4°C). For full proteome analysis, samples were adjusted to equal protein amounts by BCA assay (see ‘MS-based ABPP’) and subsequently precipitated with ice-cold acetone (4 × volumes) at −20°C overnight. Precipitated proteins are pelletized (10 000 rpm, 15 min, 4 °C) and supernatant is discarded. For washing, protein pellet is resuspended in 0.5 mL cold methanol (−80 °C) by mild sonication (10 s, 10 % intensity) and centrifuged (21 000 g, 10 min, 4 °C) twice.

*Reduction, Alkylation and Digest*

Each protein pellet is resuspended in 200 μL denaturation buffer (7 M urea, 2 M thiourea in 20 mM HEPES buffer, pH = 7.5), then reduced with 10 mM Tris(2-carboxyethyl)phosphine hydrochloride (TCEP; 600 rpm, 1 h, 37°C) and subsequently alkylated with 10 mM iodoacetamide (IAA; 600 rpm, 30 min, r.t.). Alkylation was quenched by the addition of 10 mM dithiothreitol (DTT; 600 rpm, 30 min, r.t.). For digestion, LysC (1:200 enzyme:protein ratio; 0.5 μg/μl) was added to each sample and incubated for 2 h at r.t. with shaking at 600 rpm. 50 mM triethylammonium bicarbonate (TEAB, 600 μL) was added and the pH value was checked to be above 8. Trypsin (1:100 enzyme:protein ratio; 0.5 μg/μL in 50 mM acetic acid, *Promega*) was added to digest the samples for 16 h (37 °C, 600 rpm) and quenched the next day by acidifying with formic acid (10 μL, final pH below 3.0). Samples were centrifuged (13 000 rpm, 3 min, r.t.) before proceeding to the desalting step and filtration step according to procedure described in ‘MS-based ABPP’.

*LC-MS/MS Measurement*

MS analysis was performed on an Orbitrap Fusion mass spectrometer coupled to an Ultimate3000 nano-HPLC via a Nanospray Flex Ion Source (ThermoFisher Scientific). Samples were loaded onto the trap column (AcclaimPepMap 100 C18 (75 μm×2 cm) trap/ flow rate: 5 µL/min, 0.1 % TFA) and separated on the Aurora UltimateTM columns(2nd generation, 75 µm×25 cm, *ionopticks*). Both columns were constantly heated to 40 °C. The subsequent separation was carried out with a flow rate of 400 nL/min using buffer A (0.1% FA in ddH20) and buffer B (0.1% FA in acetonitrile). The analysis started with washing for 7 min with 5% buffer B for desalting followed by a gradient from 5% to 28% buffer B over 105 min, a second gradient from 28% B to 35% B within 10 min, and a final increase to 90% B in 10 min. Isocratic washing with 90% B was performed for 10 min, then decreased to 5% in 0.1 min and held at 5% for additional 9.9 min for re-equilibration. The Orbitrap was operated in a cycle time (3 s) data dependent mode. An AGC target of 2e5, a maximum injection time of 50 ms, 60% RF lens and a resolution of 120 000 in a scan range of 300-1500 *m/z* in profile mode was used. Monoisotopic precursor selection and dynamic exclusion (60 s) was turned on. For fragmentation, most intense precursors with charges of 2-7 and intensities greater than 5e3 were chosen. Quadrupole isolation was performed using a range of 1.6 *m/z.* Precursor ions were separated using an AGC target of 1e4 and a maximum injection time of 35 ms. Fragmentation was performed using higher-energy collisional dissociation with a collision energy of 30%. Fragments were detected in the ion trap operating at a rapid scan rate.

*Data Analysis*

Data is acquired using Xcalibur software version 3.1 sp3 and processing of the obtained label-free quantification data is done by MaxQuant 1.6.2.10.[12](#_ENREF_12) In brief, cysteine carbamidomethylation was set as fixed modification and methionine oxidation and *N*-terminal acetylation as variable modifications. Trypsin (without *N*-terminal cleavage to proline) was set as proteolytic enzyme with a maximum of two allowed missed cleavages. Label-free quantification (LFQ) mode was performed with a minimum ratio count of 2. The “match between runs” (0.7 min match and 20 min alignment time window), second peptide identification and iBAQ options were activated. Peptides were searched against the *UniProt*[*15*](#_ENREF_15) database for *H. pylori* 26695. All other parameters were used as default in the software. LFQ intensities were further processed with Perseus version 2.0.10.0.[14](#_ENREF_14) Peptides of the categories “only identified by site”, “reverse”, or “potential contaminant” were removed and LFQ intensities were log2 transformed. Rows were annotated in respective groups.

For *H. pylori* Δ*tpx* verification, data was searched for LFQ intensities of O25151 (Uniprot ID, thiol peroxidase, HpTpx) and compared to wildtype *H. plyori* 26695 in a profile plot. Experiment was performed in biological triplicates (n = 3).

## Binding Site Identification isoDTB Workflow

Binding site identification was performed with lysates obtained from ABPP MS-based labeling studies in *H. pylori* with **Metro-P3** (1 µM) with modifications to a previously published mass spectrometry workflow using isotopically labelled desthiobiotin azide tags (isoDTB workflow) procedure where the digestion and enrichment steps were swapped. [16](#_ENREF_16),[17](#_ENREF_17)

Four samples of two biological replicates were prepared each as light or heavy tagged version. For this, the protein concentration was adjusted to 1 mg/mL in 0.4 % (w/v) SDS in PBS (absolute protein amount per sample *H. pylori* 26695: 0.5 mg). A Click mix solution with heavy and light isoDTB (desthiobiotin azide) azide tags was prepared, where in total two tubes were mixed with TBTA (Tris[(1-benzyl-1H-1,2,3-triazol-4-yl)methyl]amin, 90 µL, 0.9 mg/mL stock in 4:1 *t*BuOH/DMSO), TCEP (Tris(2-carboxyethyl)phosphine, 30 µL, 13 mg/mL stock in ddH20) and CuSO4 (30 µL, 50 mM stock in ddH20). 30 µL of heavy or light isoDTB tag (5 mM stock in DMSO) were added to the tube. Click mix solutions (60 µL) were added to the **Metro-P3** labeled *H. pylori* samples (2 × heavy, 2 × light) and incubated at room temperature for one hour. After combining heavy and light samples of each biological replicate, cold acetone (800 µL, −20 °C) was added to both tubes, and samples were incubated at −20°C for at least 2 hours for full protein precipitation. The samples were centrifuged (13 000 × g, 4° C, 10 min) and resulting protein pellet was washed two times with MeOH (500 µL, −20 °C) *via* mild sonication (10%, 5 × cycle, 10 s) and centrifugation (13000 × g, 4° C, 10 min). The supernatant was removed, and the protein pellet was air-dried for 10 min. After dissolving the pellet in urea (300 µL, 8 m in 0.1 m TEAB, triethylammonium bicarbonate buffer) *via* mild sonication (10%, 5 × cycle, 10 s), the sample was centrifuged (13000 × g, r.t., 3 min). For reduction of disulfide bonds, DTT (15 µL, 31 mg/ml in ddH2O) was added to the samples and incubated at 37 °C for 45 min with constant shaking (850 rpm, Thermomixer, *Eppendorf*). IAA (iodoacetamide 15 µL, 74 mg/mL stock in ddH2O) was added for cysteine carbamidomethylation and incubated at 37 °C for 30 minutes while shaking (850 rpm, Thermomixer, *Eppendorf*). After addition of DTT (15 µL, 31 mg/ml stock in ddH2O) to quench excess IAA, samples were shaken at 37 °C for further 30 min (850 rpm, Thermomixer, *Eppendorf*). 900 µL of 0.1 m TEAB was added to each tube and samples were digested with 20 µL of trypsin (ratio trypsin/protein 1:100, 0.5 µg/µL in 50 mM acetic acid, *Promega*) overnight while shaking (37 °C, 220 rpm, Incubator Shaker, *Eppendorf New Brunswick*).

*Streptavidin bead enrichment*

Subsequently, the peptide solution was diluted 1:1 using 0.2% (v/v) NP-40 in PBS, and isoDTB-conjugated peptides were enriched on high-capacity streptavidin agarose beads (50 µL slurry, *Fisher Scientific*, 10733315) in 0.1% (v/v) NP-40 in PBS for 1h at r.t while rotating (disc rotator). The suspension was centrifuged (1,000 g, 2 min, rt) and the supernatant was removed.Samples were centrifuged (1000 × g, r.t., 2 min) and the supernatant was removed. NP-40 (600 µL, 0.1% in PBS) was added to each sample and transferred to centrifugation columns (*Fisher Scientific* PierceTM) to perform washing by gravity flow. Each sample was washed with NP-40 (1 × 600 µL, 0.1% in PBS), with PBS (3 × 600 µL, and ddH2O (3 × 600 µL). Peptides were eluted into tubes (*Eppendorf*) with 1 × 200 μL and 2 × 100 μL elution buffer (0.1% TFA in 50% aqueous MeCN) followed by a final centrifugation step (3000 × g, 3 min, r.t.). The solvent was removed in speed vac (5 h, 30 °C, Concentrator Plus, *Eppendorf)* and the resulting dried peptides were stored at ‒20 °C until analysis.

*LC-MS/MS Analysis*

The samples were analyzed according to a published procedure.[17](#_ENREF_17) Prior to analysis dried peptides were reconstituted in 0.1% (v/v) TFA *via* sonication (3 × 5 min, *Bandelin* Sonorex) and filtered through 0.22 µm PVDF filters (*Millipore*). Samples were transferred to MS vials and analysed via HPLC-MS/MS using an UltiMate 3000 nano HPLC system (*Dionex*) equipped with Acclaim C18 PepMap100 trap column (75 µm ID × 2 cm, Acclaim, *ThermoFisher*) and Aurora UltimateTM (1st generation, 20 cm nanoflow UHPLC compatible, *ionopticks*) separation columns coupled to a Q Exactive Plus Orbitrap Mass Spectrometer (*Thermo Fisher Scientific*). Samples were loaded onto the trap column and washed with TFA (0.1% in ddH2O). The subsequent separation was carried out with a flow rate of 400 nL/min using buffer A (0.1% FA in ddH2O) and buffer B (0.1% FA in MeCN). The separation column was heated to 40 °C. Analysis started with washing for 7 min with 5% buffer B for desalting followed by a gradient from 5% to 40% buffer B over 105 min, a second gradient from 40% B to 60% B within 10 min and a final increase to 90% B in 10 min. Isocratic washing with 90% B was performed for 10 min, then decreased to 5% in 0.1 min and held at 5% for additional 9.9 min for re-equilibration. The Q Exactive Plus mass spectrometer was run in a TOP10 data-dependent mode. In the orbitrap, full MS scans were collected in a scan range of 300-1500 m/z at a resolution of 70 000 and an AGC target of 3e6 with 80 ms maximum injection time. The TOP10 peaks were selected for MS2 scan with a minimum AGC target of 1e3 and isotope exclusion and dynamic exclusion (exclusion duration: 60 s) enabled. Peaks with unassigned charge or a charge of +1 were excluded. Peptide match was “preferred”. MS2 spectra were collected at a resolution of 17 500 aiming at an AGC target of 1e5 with a maximum injection time of 100 ms. Isolation was conducted in the quadrupole using a window of 1.6 m/z. Fragments were generated using higher-energy collision induced dissociation (HCD, normalized collision energy: 27%) and finally detected in the orbitrap.

*Data analysis*

The data analysis described in the following sections was performed according to a published procedure[17](#_ENREF_17) and adjusted for binding site identification studies. The deposited files can be downloaded from the PRIDE database. Detailed results of the analysis can be found in the excel sheet Supporting_Excel_1_isoDTB.

*General setup of analysis software*

Acquired raw data of performed LC-MS/MS analyses was converted into a mzML format using the MSconvert tool (version: 3.0.21193-ccb3e0136) of the ProteoWizard software (version: 3.0.21193 64bit)[18](#_ENREF_18) using standard settings with vendor´s peak picking enabled. For further data analysis the FragPipe interface (version: 14.0) with MSFragger (version 3.1.1)[19-23](#_ENREF_19), Philosopher (version: 3.3.10)[24](#_ENREF_24), IonQuant (version 1.4.6)[25](#_ENREF_25) and Python (version 3.7.3) was used. A FASTA database for *H. pylori* 26695 was downloaded from www.uniprot.org on 7th of April 2021.[15](#_ENREF_15) The reverse sequences were manually added to the FASTA databases.

*OpenSearch Analysis of mass of modifications with FragPipe*[19-23](#_ENREF_19) [24](#_ENREF_24) [25](#_ENREF_25).

To survey the landscape of all mass shifts observed on the peptides of **Metro-P3** labeled *H. pylori* proteome in the data set, an OpenSearch was performed with MSFragger[19-23](#_ENREF_19) [24](#_ENREF_24) [25](#_ENREF_25). For this purpose, the following settings were used: Precursor mass tolerance ‒150 to 1000 Da, (initial) fragment mass tolerance 20 ppm, Calibration and Optimization ‘Mass calibration, parameter optimization’ enabled, Isotope Error ‘0’, enzyme name ’trypsin’ , cut after ‘KR’, but not before ‘P’, cleavage ‘enzymatic’ , missed cleavages ‘2’, Clip N-term N enabled, peptide length 7 to 50, peptide mass range 500 to 5,000 Da, no variable modifications, no fixed modifications, all other options were left at the standard settings. Crystal-C[21](#_ENREF_21) was enabled. PeptideProphet[24](#_ENREF_24) was run with the following setting: ‘--nonparam --expectscore --decoyprobs --masswidth 1000.0 --clevel -2’. PTMProphet was disabled. ProteinProphet[24](#_ENREF_24) was run with the following settings: ‘--maxppmdiff 2000000’. Generate report was enabled with the following settings: ‘--sequential --razor –mapmods --prot 0.01’. Run MS1 quant was disabled. Run TMT-Integrator was disabled. PTM-Shepherd [22](#_ENREF_22) was enabled with the following settings: Smoothing factor ‘2’, Precursor tolerance ‘0.01 Da’, Prominence ratio ‘0.3’, Peak picking width ‘0.002 Da’ , Localization background ‘4’. Annotation tolerance ‘0.01 Da’, Custom mass shifts: a custom mass shift list was used including only UniMod modifications with less than 400 Da molecular weight as previously published[17](#_ENREF_17), Ion Types for modification with ‘b’ and ‘y’ enabled and mass fragment charge ‘2’. Generate Spectral Library was disabled. For downstream data analysis, the ‘global.modsummary.tsv’ file was searched for mass shifts >482 Da with differences of 6.0075 ± 0.0010 Da between heavy and light isoDTB tags clicked to **Metro-P3**.

*ClosedSearch Analysis for Binding site identification studies with FragPipe*

To identify binding sites and quantify specific amino acids a *Closed Search* was performed in MSFragger[19-23](#_ENREF_19) [24](#_ENREF_24) [25](#_ENREF_25). For this purpose, the following settings were used: Precursor mass tolerance ‒50 to 50 ppm, fragment mass tolerance 20 ppm, Calibration and Optimization ‘none’, Isotope Error ‘0/1/2’, enzyme name ‘trypsin’ , cuter after ‘K’ , but not before ‘P’, cleavage ‘enzymatic’ , missed cleavages ‘2’, Clip N-term N enabled, peptide length 7 to 50, peptide mass range 500 to 5,000 Da, no mass offsets, all other options were kept at default settings. Variable modifications were set to the detected mass shifts 660.3462 and 666.3528 found in the Open Search on cysteines (C) with max. 1 occurrence and additionally a variable modification of 57.02146 Da on cysteines with max. 3 occurrences was added. Crystal-C was disabled. PeptideProphet was run with the following settings: ‘--decoyprobs --ppm --accmass --nonparam –expectscore’. PTMProphet was disabled. ProteinProphet was run with the following settings: ‘--maxppmdiff 2000000’. Generate report was enabled with the following settings: ‘--sequential – razor -- prot 0.01’. PTM-Shepherd was disabled. Run MS1 quant was enabled with the following settings: IonQuant enabled, Labeling based quant with the detected mass shifts 660.3462 (light) and 666.3528 (heavy) on cysteines, Re-quantify enabled, Top N ions ‘3’, Min freq. ‘0.5’, Min scans ’1’, Min isotopes ‘2’, Normalize disabled. RT window (minutes) ‘0.4’ and m/z Window (ppm) ‘10’.

Generate Spectral Library was disabled. For duplicates, both runs were analyzed as different experiments. For downstream data analysis, the ‘ion_label_quant.tsv’ files of the two experiments were analyzed separately. For each entry, the ‘Modified peptide’ was generated as either the ‘Light Modified Peptid’ or the ‘Heavy Modified Peptide’ based on the entry with the higher ‘PeptideProphet Propability’. The masses of probe modification in the ‘Modified Peptide’ were replaced by a ‘*’ and the mass of carbamidomethylation ([57.0215]) was deleted if present. The full protein sequence was linked to the table. Based on this information, all peptide sequences that do not occur

exactly once in the same protein were excluded and the residue number of the modified residue was determined. The ‘Identifier’ was generated in the format ‘UniProtCode’_C_’residue number’, where C represents the one letter code of the modified amino acid cysteine. For each ‘identifier’, the averaged ‘Log2 Ratio HL’, which is the log2 transformed ratio of heavy and light ions, was determined as average of the ‘Log2 Ratio HL’ of all corresponding ions weighted with the ‘Total intensity’ of the ion, which was calculated as the sum of ‘Light Intensity’ and ‘Heavy Intensity’ for each ion. The value was disregarded if the standard deviation of the ‘Log2 Ratio HL’ values was > 1.41 for all ions of the same ‘Identifier’.

Additionally, for each ‘Identifier’ the ‘Total Intensity’, ‘Total Light Intensity’ and ‘Total Heavy Intensity’ were calculated as the sum of all ‘Total Intensity’, ‘Light Intensity’ and ‘Heavy Intensity’ values of the individual ions, respectively. If several different ‘Modified peptides’ were detected for the same ‘Identifier’, the ‘Modified Peptide’ and the ‘Peptide Sequence’ with the shortest sequence were kept. For all identifiers, the data for both replicates were now combined in one table (Table S10). The ‘Log2Ratio HL’ values for the replicates were named ‘Log2 ratio HL replicate 1’ and ‘Log2 ratio HL replicate 2’. The average of these two values was calculated and named ‘Log2 ratio HL’. The value was disregarded, if the standard deviation between the replicates was > 1.41 or if the identifier was only quantified in one of the replicates ‘missed filter’. Remaining peptide sequences that fulfilled all mentioned criteria were assigned to be the binding sites of **Metro-P3** in *H. pylori* 26695 (**Table S11**).

**Table S 12:** Final binding site identification results after combining data of both replicates of **Metro-P3** labeled *H. pylori* 26695 for the detected mass shifts 660.3462 (light) and 666.3528(heavy) on cysteines.

| **Protein Name** | **Identifier** | **Modified Peptide** | **Log2 Ratio HL** |
| --- | --- | --- | --- |
| 60 kDa chaperonin | P42383_C63 | EIELSC*PVANMGAQLVK | -0.646878149 |
| Thiol peroxidase | O25151_C60 | FQVVSALPSLTGSVC*LLQAK | -0.403514043 |
| Cinnamyl-alcohol dehydrogenase ELI3-2 | O25732_C90 | VGDVVGVGC*FVNSCK | Missed Filter |
| Thiol peroxidase | O25151_C94 | LPSVSFSVISMDLPFSQGQIC*GAEGIK | Missed Filter |
| Alkyl hydroperoxide reductase C | P21762_C49 | DFTFVC*PTEIIAFDKR | Missed Filter |
| Fumarate hydratase class II | O25883_C85 | GELC*GEFPLAIWQTGSGTQTNMNLNEVIANK | Missed Filter |
| Nitrogen fixation protein NifU | O25009_C54 | LIVADYGAEAC*GDAVR | Missed Filter |

## Intracellular EC50 Determination in *H. pylori*

To determine intracellular EC50 values in *H. pylori* 26695, Metro or **MF-03** were added in excess in a competition experiment concentration-dependently to read-out the residual labeling of HpTpx and HpGroEL protein bands with probe **Metro-P3** (1 µM final concentration). The labeling procedure was followed as described above in ‘Gel-based Fluorescent Labeling – in situ ABPP’. After SDS-PAGE and fluorescence visualization, the intensity values of the fluorescent bands of the proteins HpTpx (ca. 18 kDa, verified by Δ*tpx* mutant) and HpGroEL (60 kDa band) were determined by *ImageJ*[*1*](#_ENREF_1)as reported previously.[26](#_ENREF_26) A rectangle was drawn around the bands of interest to plot their profile of intensity by using the ‘gel analyser tool’. Signal intensities were quantified as peak areas and were normalized relative to treatment with probe **Metro-P3** only (100 % labeling) and DMSO treatment (0 % labeling). Respective values were plotted in GraphPad Prism 10 against log-transformed compound concentrations. Intracellular EC50 values were calculated from three independent biological replicates (n = 3) by fitting the obtained mean values using the function ‘log(inhibitor) vs. response - Variable slope (four parameters)’ for HpGroEL. For HpTpx, fitted function was extrapolated at 50% reduction of labeling intensity (y-axis) to reveal respective concentration on x-axis since full competition was not observed for **Metro**. Coomassie staining of the gels revealed equal protein amounts and served as loading control.

## Recombinant Protein Overexpression from *E. coli*

*Overexpression of unmodified recombinant proteins*

Overexpression of unmodified recombinant protein expression of HpTpx, HpTpx C94A and HpGroEL in *E. coli* was performed as follows. LB-media containing 0.1 mg/mL ampicillin (100 mg/mL stock in ethanol/ddH2O = 1/1) or 0.025 mg/mL kanamycin (25 mg/mL stock in ddH2O) was inoculated with 1:100 overnight culture *E. coli* BL21 (DE3) strain containing the expression plasmids pET55-dest-HpTpx/HpTpx-C60A or pEt28a(+)-HpGroEL, respectively. Bacterial cultures were grown at 37 °C while shaking (200 rpm) until reaching an OD600 of 0.5-0.6 and protein expression is induced by adding 1 mM *iso*-propyl-1-thio-β-galactopyranoside (IPTG, 1 M stock in ddH2O) and the protein expression was carried out at 18°C (200 rpm, 16 h).The next day, bacteria were harvested (6000 × g, 4°C, 10 min, rotor SLA-3000; Sorvall RC 6+, *Thermo Scientific*) and washed with PBS (30 mL) once prior to cell lysis and protein purification.

*Anaerobic Overexpression in the presence of Metro or* ***Metro-P3***

This experimental approach aimed to modify the protein during the expression in *E. coli* under anaerobic conditions to ensure reductive activation of **Metro** or **Metro-P3**.[27](#_ENREF_27)

The expression of recombinant proteins modified with **Metro** or **Metro-P3** in *E. coli* was conducted as follows. Bacterial cultures were grown in 600 mL LB media supplemented with 0.1 mg/mL ampicillin (HpTpx) or 0.025 mg/mL kanamycin (HpGroEL) and inoculated with 1:100 overnight culture *E. coli* BL21 (DE3) strain containing either the expression plasmid pET55-dest-HpTpx or pet28a(+)-HpGroEL, respectively. The cultures were allowed to grow at 37°C with shaking (200 rpm) until reaching an OD600 of ≈0.6. Metronidazole or **Metro-P3** were added in different concentrations (1:1000; final concentrations 31.3 µM, 62.5 µM, 125 µM, 250 µM). Protein expression was induced by adding 1 mM *iso*-propyl-1-thio-β-galactopyranoside (IPTG, 1 M stock in ddH2O). Subsequently, the cultures were transferred into 500 mL sterile Schott Flasks, holding a volume of approximately 600 mL. The flasks were tightly sealed to create a pseudo-anaerobic environment, and a single inversion was performed to ensure homogeneity of the culture. Overexpression was performed at 18°C for 3 h (25 rpm). Bacteria were harvested (6000 × g, 4°C, 10 min, SLA-3000; Sorvall RC 6+, *Thermo Scientific*) and washed with PBS (20 mL) once prior to cell lysis and protein purification.

## Purification of recombinantly expressed proteins

A summary of all purified proteins used within this work including expression conditions, applied purification steps, and determined degree of modification via intact-protein mass spectrometry (IP-MS) are summarized in **Table S13** (HpGroEL) and **Table S14** (HpTpx).

*Purification of HpGroEL (C-terminally His tagged protein)*

Protein purification was adapted from *Mendoza et al.*[*28*](#_ENREF_28)

Protein purification of recombinant HpGroEl was performed using a HisTrap HP 5 mL column (*GE Healthcare*) for Ni-NTA affinity purification followed by size exclusion chromatography with a Superdex (HiLoad 16/600 Superdex 200 pg, *Cytiva*) or analytical Superose 6 (Increase 10/300 GL with fractionation) column (*GE Healthcare*). All purification conditions and obtained modification degrees are summarized in **Table S13.**

**Table S 13**: Summary of all expression and purification conditions and respective observed modification degrees of HpGroEL as mean values of three independently prepared IP-MS measurements (n = 3).

| Protein | Expression cond. | Purification | Mod. Degree |
| --- | --- | --- | --- |
| HpGroEL | 18 °C, 16 h, 200 rpm, aerobic | His, SEC  (Superdex200) | 0% |
| HpGroEL x Metro | 31.3 µM Metro, 18°C, 3 h, anaerobic | His, SEC  (Superdex200) | 22 % |
| HpGroEL x Metro | 62.5 µM Metro, 18°C, 3 h, anaerobic | His, SEC  (Superose 6 Increase) | 44 % |
| HpGroEL x Metro | 125 µM Metro, 18°C, 3 h, anaerobic | His, SEC  (Superose 6 Increase) | 61 % |
| HpGroEL x Metro | 250 µM Metro, 18°C, 3 h, anaerobic | His, SEC  (Superose 6 Increase) | 68 % |
| HpGroEL x Metro | 500 µM Metro, 18°C, 16 h, anaerobic | His, SEC  (Superdex200) | 100% |
| HpGroEL x Metro-P3 | 31.3 µM Metro, 18°C, 3 h, anaerobic | His, SEC  (Superose 6 Increase) | 25 % |
| HpGroEL x Metro-P3 | 62.5 µM Metro, 18°C, 3 h, anaerobic | His, SEC  (Superose 6 Increase) | 34 % |
| HpGroEL x Metro-P3 | 125 µM Metro, 18°C, 3 h, anaerobic | His, SEC  (Superose 6 Increase) | 39 % |
| HpGroEL x Metro-P3 | 250 µM Metro, 18°C, 3 h, anaerobic | His, SEC  (Superose 6 Increase) | 47 % |
| HpGroEL x Metro-P3 | 100 µM **Metro-P3**, 18°C, 16 h, anaerobic | His, SEC  (Superdex200) | 71% |

Cell pellets were resuspended in 20 – 50 mL His wash buffer buffer (50 mM Tris-HCl, 10 mM imidazole, pH = 8.0) and lysed by sonication (7 min 30 %, 3 min 70 %, 3 cycles; *Bandelin* Sonolus HD 2070). The lysate was clarified by centrifugation (18 000 rpm, 45 min, 4 °C, SLA-3000), the supernatant was filtered through a 0.45 µm PVDF filter (Whatman GD/X25, *Cytiva*) and loaded (via sample pump (S9, Cytiva)) onto a pre-equilibrated HisTrap HP 5 mL column (*Cytiva;* His wash buffer; 50 mM Tris-HCl, 10 mM imidazole, pH = 8.0) integrated into a Äkta purifier10 FPLC system (*GE Healthcare*). After loading, non-specifically bound proteins were removed by extensive washing with 1% buffer B (His Elution Buffer; 50 mM Tris-HCl, 500 mM imidazole, pH = 8.0) for 5 column volumes (CVs). Then, His tagged HpGroEL was eluted with a linear gradient from 1% to 100% buffer B over 7.5 CVs followed by isocratic elution at 100% B for 2.5 CVs. The protein containing elution fractions were concentrated (*Amicon*, 30 kDa cut-off, 3500 × g, 4°C) and preparative size-exclusion chromatography was performed over 1.25 column volumes with the concentrated sample using either a 120 mL pre-equilibrated Superdex column (HiLoad 16/600 Superdex 200 pg*, Cytiva*) or a 24 mL Superose 6 (Increase 10/300 GL) column in SEC buffer (50 mM Tris-HCl, pH = 7.5) on the same purification system. Peaks were analyzed using SDS-Page and IP-MS (see ‘Intact Protein MS’) to concentrate protein with correct monomeric masses and protein aliquots were snap frozen in liquid nitrogen and stored at -80 °C. Protein concentrations were measured at 280 nm on a *Tecan* Infinite® M Nano plate reader in a NanoQuant plate™.

Due to the tedious purification leading to very low yields, anaerobic expressions of HpGroEL with Metronidazole or **Metro-P3** in different concentrations (final concentrations 31.3 µM, 62.5 µM, 125 µM, 250 µM) were only subjected to IP-MS and could not be used for ATPase activity assays. Only purifications of unmodified HpGroEL and the modification degrees 100 % Metro and 71% **Metro-P3** led to sufficient protein amounts that were further projected to biological activity assays.

*Purification of unmodified and modified HpTpx and HpTpx C94A mutant (Strep II tagged proteins)*

Protein purification of recombinant HpTpx was performed using a StrepTap 5 mL column (*GE Healthcare*) for affinity purification followed by size exclusion chromatography with a Superdex (HiLoad 16/600 Superdex 75 pg, *Cytiva*) if indicated. All purification conditions and obtained modification degrees are summarized in **Table S14.**

HpTpx purification was adapted Nguyen et al.[29](#_ENREF_29)

| Protein | Expression cond. | Purification | Mod. Degree |
| --- | --- | --- | --- |
| HpTpx | 18 °C, 16 h, 200 rpm, aerobic | Strep | 0 % |
| HpTpx x Metro | 31.3 µM Metro, 18°C, 3 h, anaerobic | Strep | 8 % |
| HpTpx x Metro | 62.5 µM Metro, 18°C, 3 h, anaerobic | Strep | 12 % |
| HpTpx x Metro | 125 µM Metro, 18°C, 3 h, anaerobic | Strep | 24 % |
| HpTpx x Metro | 250 µM Metro, 18°C, 3 h, anaerobic | Strep | 42 % |
| HpTpx x Metro | 1 mM Metro, 18°C, 16 h, anaerobic | Strep | 95 % |
| HpTpx x Metro-P3 | 31.3 µM **Metro-P3**, 18°C, 3 h, anaerobic | Strep | 34 % |
| HpTpx x Metro-P3 | 62.5 µM **Metro-P3**, 18°C, 3 h, anaerobic | Strep | 49 % |
| HpTpx x Metro-P3 | 125 µM **Metro-P3**, 18°C, 3 h, anaerobic | Strep | 71 % |
| HpTpx x Metro-P3 | 250 µM **Metro-P3**, 18°C, 3 h, anaerobic | Strep | 88 % |
| HpTpx x Metro-P3 | 100 µM **Metro-P3**, 18°C, 16 h, anaerobic | Strep | 98 % |
| HpTpx | 18 °C, 16 h, 200 rpm, aerobic | Strep, SEC (Superdex75) | 0% | Crystallography |
| HpTpx C94A x Metro | 500 µM, 18°C, 16 h, anaerobic | Strep, SEC (Superdex75) | ≈100% |
| HpTpx C94A x Metro-P3 | 100 µM **Metro-P3**, 18°C, 16 h, anaerobic | Strep, SEC (Superdex75) | ≈100% |

**Table S 14:** Summary of all expression and purification conditions and respective observed modification degrees of HpTpx as mean values of three independently prepared IP-MS measurements (n = 3). Strep = Strep affinity purification, His = His affinity purification, SEC = size exclusion chromatography.

Cell pellets were resuspended in 20 – 50 mL lysis buffer (50 mM NaH2PO4, 300 mM NaCl, 1 mM PMSF, pH = 8.0) and lysed by sonication (7 min 30 %, 3 min 70 %, 3 cycles; *Bandelin* Sonolus HD 2070). The lysate was clarified by centrifugation (18 000 rpm, 45 min, 4 °C, SLA-3000, Sorvall RC 6+, *Thermo Scientific*), the supernatant was filtered through a 0.45 µm PVDF filter (Whatman GD/X25, Cytiva) and loaded via sample pump (S9, Cytiva) onto an pre-equilibrated (with Strep binding buffer; 50 mM NaH2PO4, 300 mM NaCl, pH = 8.0) StrepTrap column (*GE Healthcare*) integrated into an ÄKTA pure 25 FPLC protein purification system (*GE Healthcare*, software: unicorn 7.5) coupled to a fraction collector (F9-C, *GE Healthcare*). The column was extensively washed with Strep binding buffer for 5 column volumes (CVs), and the protein was eluted with Strep elution buffer (50 mM NaH2PO4, 300 mM NaCl, 2.5 mM desthiobiotin (DTB), pH = 8.0) for 5 CVs. Fractions containing protein based on UV-detection were pooled and concentrated with centrifugal mass filters (*Amicon*, 10 kDa cut-off, 3500 × g, 4°C) while the buffer was exchanged to HEPES buffer (20 mM, pH = 7). Protein concentrations were measured at 280 nm on a *Tecan* Infinite® M Nano plate reader in a NanoQuant plate™ and 50 µL aliquots were snap frozen in liquid nitrogen and stored at –80 °C. Correct protein mass or modification degree of protein was checked via Intact-Protein Mass Spectrometry (IP-MS). The purity of HpTpx was verified by SDS-PAGE and used in activity assays without further purification.

For crystallography, HpTpx or HpTpx C94A modified with **Metro** or **Metro-P3** were further purified using size-exclusion chromatography. Preparative size-exclusion chromatography was performed over 1.25 column volumes with the concentrated sample using a 120 mL pre-equilibrated Superdex column (HiLoad 16/600 Superdex 75 pg, *Cytiva*) in SEC buffer (20 mM HEPES, pH = 7.0) on the same purification system. Monomeric protein fractions were pooled, concentrated and protein concentrations were measured at 280 nm on a *Tecan* Infinite® M Nano plate reader in a NanoQuant plate™. Monomeric protein fractions of HpTpx or HpTpx C94A modified with Metro or **Metro-P3** were pooled, and correct mass and degree of modification was determined by IP-MS (see ‘Intact Protein MS’). Proteins were concentrated to final concentrations of 20 – 30 mg/mL measured at 280 nm on a *Tecan* Infinite® M Nano plate reader in a NanoQuant plate™ and directly subjected to crystallographic analysis.

## Intact Protein MS

For intact protein MS (IP-MS) measurements, unmodified or modified proteins were diluted to a final concentration of 5 – 10 µM in MS-grade PBS and transferred to MS vials. For labeling experiments of HpTpx with probes, HpTpx was diluted to a final concentration of 1 µM in MS-grade PBS. **Metro-P1**, **Metro-P2**, **Metro-P3** were added to a final concentration of 200 µM and incubated for 1 h (37°C, 200 rpm) prior to analysis.

IP-MS measurements were carried out on an Ultimate 3000 RSLC system (*Thermo Scientific*) coupled to either an LTQ Orbitrap XL, LTQ FT Ultra or Q Exactive Plus mass spectrometer (*Thermo Scientific*). For all devices, protein desalting was carried out using a MassPREP desalting column (*Waters*) at 22 °C. Gradient elution was carried out with buffer A (0.1% formic acid in ddH2O; LC-MS grade, *Fisher Analytics*) and buffer B (0.1 % formic acid in acetonitrile; LC-MS grade, *Fisher Analytics*). After 2 min pre-equilibration with 6 % B, protein samples were injected and eluted with a linear gradient from 6 to 95% B over 1.5 min followed by isocratic elution for 2 min at 95% B at a 300 μL/min flow rate. The column was re-equilibrated with 6 % B for 1 min.

LTQ Orbitrap XL mass spectrometric measurements were conducted in HESI-positive mode (H-ESI-II source, *Thermo Scientific*) with the following parameters: 4.0 kV spray voltage, 350 °C capillary temperature, 31 V capillary voltage, 110 V tube lens, 30 L/h sheath gas, 15 L/h aux gas. Full scan measurements were accomplished in a range from 300 to 2000 *m*/*z* in profile mode in the orbitrap at a resolution of 100 000.

LTQ FT mass spectrometric measurements were conducted in HESI-positive mode (H-ESI-II source, *Thermo Scientific*) with the following parameters: 4.0 kV spray voltage, 275 °C capillary temperature, 31 V capillary voltage, 110 V tube lens, 60 L/h sheath gas, 10 L/h aux gas, sweep gas 0.2 L/h. Full scan measurements were performed in a range from 600 to 2000 *m*/*z* in profile mode at a resolution of 200 000.

Q Exactive Plus mass spectrometric measurements were conducted in HESI-positive mode (H-ESI-II source, *Thermo Scientific*) with the following parameters: 3.5 kV spray voltage, 350 °C capillary temperature, S-lens RF level 60.0, 40 L/h sheath gas, 10 L/h aux gas. Full scan measurements were performed in a range from 300 to 2000 *m*/*z* in profile mode in the orbitrap at a resolution of 17 500. With a maximum injection time of 200 ms and an AGC target of 1e6.

Raw spectra were processed with *UniDec* 2.6.7 or *ProMass HR for Xcalibur* (version 4.0) for deconvolution and deconvoluted masses plotted against normalized intensity by GraphPad Prism 10. Respective protein masses of HpGroEL and HpTpx with or without modification with **Metro** or **Metro-P3** are summarized in **Table S15**.

**Table S 15**: Found protein masses (±2 Da) after deconvolution of IP-MS spectra of HpGroEL and HpTpx unmodified or modified with **Metro** or **Metro-P3**. Met = methionine, Metro-NH2 = amine form of **Metro**, Metro-P3-NH2 = amine form of **Metro-P3**.

| Protein | Found mass [Da] | Found adduct |
| --- | --- | --- |
| HpGroEL (unmodified) | 60 049 | [HpGroEL – Met] |
| HpGroEL x Metro | 60 189 | [HpGroEL + **Metro**-NH2 – Met] |
| HpGroEL x Metro-P3 | 60 213 | [HpGroEL + **Metro-P3**-NH2 – Met] |
| HpTpx (unmodified) | 20 581 | [HpTpx – Met] |
| HpTpx x Metro (mono-modified) | 20721 | [HpTpx + **Metro**-NH2 – Met] |
| HpTpx x Metro (di-modified) | 20859 | [HpTpx + 2 × **Metro**-NH2 – Met] |
| HpTpx x Metro-P3 (mono-modified) | 20 746 | [HpTpx + **Metro-P3**-NH2 – Met] |
| HpTpx x Metro-P3 (di-modified) | 20 908 | [HpTpx + 2 × **Metro-P3**-NH2 – Met] |

## Recombinant Protein Labeling of HpTpx from *E. coli*

For recombinant labeling of HpTpx after purification from *E. coli*, HpTpx was diluted to a final concentration of 1 μM in PBS. 50 μL aliquots were prepared for different concentrations of **Metro-P1**, **Metro-P2** and **Metro-P3** as well as a DMSO and heat control. Heat control samples are diluted in PBS to a final concentration of 1 μM and heat shock was performed at 95°C for 20 min. To each protein sample, probes were added to final concentrations of 100 μM, 10 μM and 1 μM and labeled for 1 h (37 °C, 200 rpm). Addition of 1 % (v/v) DMSO was used as control.

For comparison of unmodified HpTpx with HpTpx modified with **Metro-P3** (98%) after anaerobic overexpression, proteins were diluted to 1 µM and 100 µM **Metro-P3** or 1 % (v/v) DMSO were added to the proteins and incubated for 1 h (37 °C, 200 rpm).

After labeling, *Click*-chemistry is performed by addition of 1 μL rhodamine azide (5 mM in DMSO), 1 μL tris(2-carboxyethyl)phosphine (TCEP, 52 mM in ddH2O), 3 μL 1× tris(benzyltriazoyl-methyl)amine (TBTA, 1.67 mM in 80% *t*BuOH and 20% DMSO) and 1 μL CuSO4 (50 mM in ddH2O) per 50 µL sample. The reaction was stopped by adding 50 μL loading buffer (2×) and the samples were analysed by SDS-PAGE as described before.

## Analytical Protein Expression and *in situ* Labeling of HpTpx or Mutants in *E. coli*

Dose-and time-dependent labeling of HpTpx with **Metro-P3** during protein overexpression in *E. coli* was performed as described in ‘Anaerobic Overexpression in the presence of Metro or **Metro-P3**’ with slight modifications for fluorescent visualization. After IPTG induction, 1.7 mL of bacterial culture (OD600 = 0.6) was pipetted into 1.5 mL tubes containing different concentrations of **Metro-P3** (final: 10 µM, 50 µM, 100 µM, 250 µM) and were incubated at 18 °C for different periods of time (2 h, 3 h, 4 h).

For labeling of HpTpx and mutants (C60A, C94A and C60A-C94A), 1.7 mL of each bacterial culture (OD600 = 0.6) were pipetted into 1.5 mL tubes containing **Metro-P3** (final: 100 µM) and incubated at 18 °C for 2 h. Labeling of HpTpx and mutants *in situ* during overexpression was performed in biological triplicates.

After incubation time, cell pellets were centrifuged (6000 × g, 10 min, 4 °C) and washed with PBS (0.5 mL) once. Cell pellets were resuspended in 200 µL PBS + 0.4 % SDS and lysed by sonication. (3 × 20 s, 30 %, pulse 5; Bandelin Sonolus HD 2070). Samples were centrifuged (21 000 × g, 30 min, 4 °C) and 100 µL of supernatant were transferred to new tube. Click-chemistry was performed by addition of 1 μL rhodamine azide (10 mM in DMSO), 2 μL tris(2-carboxyethyl)phosphine (TCEP, 52 mM in ddH2O), 6 μL 1× tris(benzyltriazoyl-methyl)amine (TBTA, 1.67 mM in 80% tBuOH and 20% DMSO) and 2 μL CuSO4 (50 mM in ddH2O) per 100 µL sample. The reaction was stopped by adding 100 μL loading buffer (2×) and the samples were analysed by SDS-PAGE as described in section ‘SDS-PAGE’.

## Crystallography

*Protein expression*

For detailed protein expression conditions, see sections 1.14 (‘Recombinant Protein Overexpression from *E. coli’*) and 1.15 (‘Purification of recombinantly expressed proteins from *E. coli’)*. For co-crystallization experiments, HpTpx C94A (HpTpx_CRA) mutant was recombinantly expressed in the presence of **Metro** or **Metro-P3** as previously described.

*Crystallization Methods*

Crystallization of HpTpxred and its complexes, HpTpx_CRA:**Metro*** (co-crystal structure of HpTpx C94A mutant with **Metro** in its amine form (*)) and HpTpx_CRA:**Metro-P3*** (co-crystal structure of HpTpx C94A mutant with **Metro-P3** in its amine form (*)), was performed using the sitting drop vapor diffusion method at 20 °C. Protein solutions (20 – 30 mg/ml) were mixed with reservoir solutions in ratios of 1:1, 2:1, or 3:1, forming drops with a maximum volume of 0.4 µl. Specific conditions for crystal growth were:

- HpTpxred: 0.1 M HEPES pH 7.5, 30% PEG 400
- HpTpx_CRA:**Metro***: 0.01 M CoCl2, 0.1 M TRIS pH 8.5, 20% PVP K15
- HpTpx_CRA:**Metro-P3***: 0.1 M BISTRIS pH 6.5, 28% PEG monomethylether 2000

Crystals were cryoprotected using a 7:3 mixture of mother liquor and 100% 2,3-butanediol, prior vitrification in liquid nitrogen.

**Data Collection and Structural Analysis:** High-resolution data sets were obtained using synchrotron radiation:

- HpTpxred and HpTpx_CRA:**Metro*** crystals at beamline X06SA, Swiss Light Source (SLS), Paul Scherrer Institute, Switzerland.
- HpTpx_CRA:**Metro-P3*** crystals at beamline ID30B, European Synchrotron Radiation Facility (ESRF), Grenoble, France.

Reflection intensities were evaluated with XDS, and data reductions were performed using XSCALE[30](#_ENREF_30). Initial phases were determined by Patterson search calculations with PHASER[31](#_ENREF_31), utilizing coordinates predicted by Alphafold2[32](#_ENREF_32). Model building was conducted with COOT[33](#_ENREF_33), and water molecules were placed automatically using ARP/wARP[34](#_ENREF_34). Refinements, including restrained and TLS (Translation/Libration/Screw) adjustments, were executed with REFMAC[35](#_ENREF_35), achieving excellent Rwork, Rfree, and rmsd for bond angles and lengths (**Table S15**).

**Deposition of Structures:** Crystal structures have been deposited in the RCSB Protein Data Bank (**Table S16**).

**Table S 16**: Crystallographic data collection and refinement statistics.

|  | **HpTpxred** | **HpTpx_CRA:Metro*** | **HpTpx_CRA:Metro-P3*** |
| --- | --- | --- | --- |
|  |  |  |  |
| **Crystal parameters** |  |  |  |
| Space group | P21 | C2 | P21 |
| Cell constants [Å/°] | a = 40.5  b = 68.6  c= 64.4  β= 99.0 | a = 67.4  b = 71.5  c = 40.8  β = 115.9 | a = 40.6  b = 67.8  c= 64.0  β= 98.7 |
| Subunits / AUa | 2 | 1 | 2 |
|  |  |  |  |
| **Data collection** |  |  |  |
| Beam line | X06SA, SLS | X06SA, SLS | ID30B, ESRF |
| Wavelength (Å) | 1.0 | 1.0 | 0.873 |
| Resolution range (Å)b | 30-1.75 (1.85-1.75) | 30-1.75 (1.85-1.75) | 30-1.95 (2.05-1.95) |
| No. observations | 105,494 | 47,462 | 70,575 |
| No. unique reflectionsc | 34,071 | 16,754 | 24,146 |
| Completeness (%)b | 96.6 (96.5) | 95.0 (97.4) | 96.2 (96.7) |
| Rmerge (%)b, d | 4.4 (68.5) | 3.4 (59.2) | 4.3 (63.8) |
| I/ (I)b | 14.1 (2.2) | 14.3 (3.1) | 11.8 (2.1) |
|  |  |  |  |
| **Refinement** |  |  |  |
| Resolution range (Å) | 30-1.75 | 30-1.75 | 30-1.95 |
| No. refl. working set | 32,361 | 15,911 | 22.932 |
| No. refl. test set | 1,703 | 837 | 1,207 |
| No. non hydrogen | 2,629 | 1,333 | 2,588 |
| No. of ligand atoms | - | 10 | 12 |
| Solvent | 79 | 44 | 18 |
| Rwork/Rfree (%)e | 18.3 / 21.9 | 19.7 / 22.4 | 17.7 / 21.7 |
| r.m.s.d. bond (Å)/angle (°)f | 0.003 / 1.2 | 0.006 / 1.2 | 0.004 / 1.1 |
| Average B-factor (Å2) | 36.0 | 56.7 | 55.3 |
| Ramachandran Plot (%)g | 99.1 / 0.9 / 0 | 98.8 / 1.2 / 0 | 99.4 / 0.6 / 0 |
|  |  |  |  |
| PDB accession code | 9F5V | 9F64 | 9F65 |

[a] Asymmetric unit

[b] The values in parentheses for resolution range, completeness, Rmerge and I/σ (I) correspond to the highest resolution shell

[c] Data reduction was carried out with XDS and from a single crystal. Friedel pairs were treated as identical reflections

[d] Rmerge(I) = ΣhklΣj | I(hkl)j - <I(hkl)> | / Σhkl Σj I(hkl)j, where I(hkl)j is the jth measurement of the intensity of reflection hkl and <I(hkl)> is the average intensity

[e] R = Σhkl | |Fobs| - |Fcalc| |/Σhkl |Fobs|, where Rfree is calculated without a sigma cut off for a randomly chosen 5% of reflections, which were not used for structure refinement, and Rwork is calculated for the remaining reflections

[f] Deviations from ideal bond lengths/angles

[g] Percentage of residues in favored region / allowed region / outlier region

## Minimal Inhibitory Concentration Assay (MIC Assay)

The minimum inhibitory concentration (MIC) represents the lowest concentration of an antibiotic that inhibits visible growth of a microorganism after a distinct incubation time and was performed as a 96 well plate-based MIC assay (transparent Nunc 96-well flat bottom, *Thermo Fisher)*.

For MIC assays in *C. difficile*, *E. coli* and *S. aureus,* overnight cultures are diluted 1:2500 (*C. difficile*) or 1:10 000 (*E. coli* and *S. aureus*) in their corresponding media (*C. difficile*: BHI supplemented with 5 g/L yeast extract, 0.1 % (w/v) L-cysteine and 1 mg/L resazurine; *E. coli and S. aureus*: LB medium). 1.5 µL 100 × stock of compound is pipetted into a 96 well plate in triplicates and 148.5 µL bacterial solution is added to obtain desired concentration. The plate is incubated at 37 °C for 24 hours (200 rpm, aerobic conditions, *E. coli* and *S. aureus*) or 72 h in an anaerobic chamber (85 % nitrogen, 5 % H2, 10 % CO2, *C. difficile*) before visual readout by eye or Tecan (OD600) revealed respective MICs as the lowest concentration without growth.

For MIC assays in *H. pylori* (26695, PMSS1), overnight cultures were inoculated from WC Dent plates and grown overnight in BHI + 10% FCS (37°C, 140 rpm, microaerophilic conditions, 5 % CO2, 10 % O2 and 85 % N2) and *H. pylori* growth was confirmed *via Stuart’s* urease test. After measurement of OD600, bacterial cultures were adapted to 0.5 McFarland units (0.5 McFarland = OD600 of a solution comprised of 99.5 mL 0.36 N H2SO4 + 0.5 mL 0.048 M BaCl2*2H2O, OD600 = 0.15; photometer blanked against air (Biophotometer plus, *Eppendorf*). Bacterial suspensions (0.5 McFarland units) were diluted 1:100 in BHI + 10 % FCS media and 50 µL were added to a sterile 96-well microtiter plate containing two-fold serial dilutions of the compound in media (50 µL) in technical triplicates. After incubation for 96 hours (37°C, 140 rpm, microaerophilic conditions), the dilution series of each compound was analyzed for microbial growth either by eye or by OD600 readout with a Tecan reader (*Promega GlowMax*). The lowest compound concentration where no bacterial growth occurs was defined as respective MIC value.

In all MIC experiments, a growth control containing DMSO and a sterile control containing medium only were included. Metronidazole was used as a control compound with known MIC in each biological independent experiment to ensure comparability of results. Experiments were performed in biological triplicates.

For MIC assays in anaerobic bacteria from the murine gut including *Bacteroides caecimuris* (I48), *Muribaculum intestinale* (YL27)*, Enterococcus faecalis (KB1), Bifidobacterium animalis (YL2),* overnight cultureswere diluted to reach a final OD600 = 0.0015 in AAM medium in an anaerobic** chamber. 50 µL of these bacterial suspensions were added to a sterile 96-well microtiter plate containing two-fold serial dilutions of respective compound in AAM media (50 µL). Dilution series of each compound was analyzed for microbial growth after incubation for 24 hours (For I48, KB1 and YL2) and for 48 h (YL27) either by eye or by OD600 readout with a Tecan reader. Experiment was performed in biological duplicates.

## Resistance development assay

Resistance development analysis is based on a procedure previously published by Ling et al.[36](#_ENREF_36) as well as a procedure published by Hamamoto et al.[37](#_ENREF_37)

For resistance development by sequential passaging, overnight cultures of *H. pylori* 26695 were diluted 1:100 into BHI + 10% FCS (500 µL) containing various concentrations of Metronidazol, Metro-P3 or DMSO as growth control. Bacteria were incubated at 37°C, 140 rpm, microaerophilic conditions, 5 % CO2, 10 % O2 and 85 % N2, and passaged in 72 h intervals in the presence of Metronidazol or Metro-P3 at different concentrations (0.25, 0.5, 1, 2 x MIC). Cultures from the second highest concentration that allowed growth (OD600 ≥ 0.9) were diluted 1:100 into fresh media (500 µL) containing different concentrations of the respective antimicrobial (0.25, 0.5, 1, 2 x MIC). If a shift in MIC levels was observed, concentrations of the respective antimicrobial were adjusted accordingly for subsequent passaging. This serial passaging was repeated for 9 days. The MIC shifts were calculated by dividing the respective daily MICs by the MIC of the DMSO-incubated culture.

## ATPase activity assay

A malachite green assay was performed to assess the ATPase activity of unmodified HpGroEL and modified HpGroEL protein with **Metro** (100 %) or **Metro-P3** (71 %). [38](#_ENREF_38),[39](#_ENREF_39)

Prior to experiment conduction, malachite green reagent was prepared freshly by mixing 4.2% (w/v) ammonium molybdate in 4 M HCl and 0.045 % (w/v) malachite green in H2O in a 1:3 ratio and filtered through a 0.22 µm syringe filter. HpGroEL variants were diluted into the ATPase reaction buffer (50 mM Tris-HCl, 1 mM KCl/MgCl2, 250 µM ATP, pH 7.5) to a final concentration of 1 µM. The reaction starts immediately after addition of the protein. At specific time points (0 min, 5 min, 10 min, 20 min, 30 min, 45 min, 60 min, and 120 min), 3 × 40 µL of reaction mixture (technical replicates) were taken out and mixed with 160 µL of freshly prepared malachite green reagent. The absorbance was measured in a transparent 96-well plate at 620 nm using an Infinite™ M Nano Tecan 200Pro reader. As a negative (-) control experiments, HpGroEL was omitted from the reaction mixture. After baseline subtraction ((-) control), initial ATPase activity rate was determined *via* simple linear regression (linear range, GraphPad Prism 10) of time dependent absorbance measurements and normalized to unmodified HpGroEL activity (100%). All experiments were performed in seven biological replicates (nbio = 7) with technical triplicates per time point. Statistical significance of reduced ATPase activity was determined *via* ordinary one-way ANOVA with multiple comparisons (no correction) to unmodified HpGroEL protein.

## Peroxidase Assay

Peroxidase activity of the purified HpTpx protein was determined as previously described. [29](#_ENREF_29),[40](#_ENREF_40)In a coupled assay with the Trx system (thioredoxin/thioredoxin reductase), rates of peroxide reduction were determined by indirectly monitoring NADPH oxidation as a decrease in absorbance at 340 nm. The assays were performed in 96-well plates in 100 µL reaction mixtures containing 200 nM trxR (recombinant *E. coli* thioredoxin reductase, *abcam*), 1 µM trx (recombinant *E. coli* thioredoxin 1, *abcam*), 400 nM (un)-modified HpTpx, 200 µM NADPH and 200 µM H2O2 in Hepes-NaOH (50 mM, pH = 7.0). The reaction was initiated by addition of NADPH, and a decrease in absorbance at 340 nm was measured using an Infinite™ M Nano Tecan 200Pro reader after 5 min incubation time. As control experiments, Trx system, HpTpx and NADPH were sequentially omitted from the reaction mixtures. After subtraction of baseline ((-) HpTpx), initial peroxide reduction rates were determined *via* simple linear regression (linear range, GraphPad Prism 9/10) of time-dependent absorbance measurements. For normalized activities, slopes were corrected by subtraction of baseline (- HpTpx) prior to normalization to unmodified HpTpx. Assay was performed in 4 (**Metro**) or 5 (**Metro-P3**) biologically independent experiments with three technical replicates per experiment (n = 4-5). Significance of reduced peroxidase activity was determined on unnormalized data *via* ordinary one-way ANOVA with multiple comparisons (no correction) of **Metro** or **Metro-P3** modified HpTpx protein to the unmodified wt HpTpx protein.

In peroxidase assays of unmodified HpTpx with and without addition of compound (**Figure S7**), protein was incubated with **Metro**, **Metro-P1**, **Metro-P2** and **Metro-P3** (final conc. 10 µM) for 30 minutes at r.t. before all other reagents were added and absorbance at 340 nm measured over time. Assay was performed in technical triplicates (ntech = 3). Statistical significance was determined by ordinary one-way ANOVA with multiple comparisons (no correction).

## DNA-based Antioxidant Activity Assay

A DNA supercoiling assay was performed as described previously with some modifications.[29](#_ENREF_29),[40](#_ENREF_40)

Nicking of supercoiled DNA was carried out in a reaction mixture containing 280 ng of pUC19 DNA (70 ng/µL; *Carl-Roth*), 5 mM DTT, 15 μM FeCl3, and 20 μM of unmodified HpTpx or modified HpTpx with **Metro** or **Metro-P3** with different modification degrees in Hepes-NaOH (100 mM, pH 7.0) buffer, and incubated at 37 °C for 30 min. 1 µL of EDTA at a final concentration of 250 mM was added to stop the reaction. A positive control was carried out with the addition of EDTA (final conc. 250 mM) before incubation. HpTpx was omitted from the reaction mixture to serve as a negative control. 4 μL of each sample was loaded on 0.8 % (w/v) agarose gel and run at 100 V for 75 min. DNA rescuing activity was determined as the ratio of supercoiled /open circular form of DNA. Band intensities were quantified by *ImageJ*[1](#_ENREF_1). Obtained ratios were normalized to positive control ratio (100% activity) and negative EDTA control was subtracted as baseline. Experiment was performed in 12 biologically independent experiments (n = 12). Statistical significance was determined by ordinary one-way ANOVA with multiple comparisons (no correction).

## MTT Assay

MTT assays were performed in flat bottom 96 well plates (NunclonTM Delta 96-Well MicroWellTM Plates, *Thermo Scientific*). For the assay, 4000 HeLa and 8000 HepG2 cells in 200 µL DMEM medium (+ 10% FCS, 2 mM L-glutamine) per well were seeded and incubated overnight to allow the cells to adhere to the wells. The next day, the medium is removed and 100 µL/well containing 1 µL of 100 × compound stock solution or 1 % (v/v) DMSO as growth control in DMEM medium (+ 10% FCS, 2 mM L-glutamine) was added to the cells and incubated for 24 h (37 °C, 5 % CO2) before 20 µL of Thiazolyl Blue Tetrazolium Bromide Solution (MTT reagent, 5 mg/mL in PBS, *Sigma Aldrich*) were added to each well. The cells were incubated for 2 h (37 °C, 5 % CO2) to allow the MTT reagent to be metabolized. After medium aspiration, the resulting formazan is resuspended in 200 µL DMSO/well. Absorbance as measured at 570 nm and background subtracted at 630 nm by a Tecan Infinite® M200 Pro Reader. Residual metabolic activity of each condition is normalized to the DMSO controls (100 % activity). Curve fitting to determine IC50 values was performed by applying a non-linear least-squares fit (log(inhibitor) vs. response curve with variable slope model) with GraphPad Prism 10. The experiment was performed in two cell lines in technical triplicates.

## Plasma Stability Assay

Prior to measurements, mouse serum (*Biowest*) was diluted 1:2 in PBS (10 mM Na2HPO4, 1.8 mM KH2PO4, 140 mM NaCl and 2.7 mM KCl, pH = 7.4) and pre-incubated for 10 min at 37°C (400 rpm, 10 min, Thermomixer, *Eppendorf*). Compounds and standard (caffeine) at a final concentration of 500 µM were added and incubated at 37°C (400 rpm, 10 min, Thermomixer, *Eppendorf*). 25 µL aliquots were taken at distinct timepoints and pipetted into 100 µL acetone (-80°C) and centrifuged (21 000 × g, 10 min, 4°C). The supernatant was transferred to a new tube and the solvent was removed under reduced pressure in a speed vac (Concentrator Plus, *Eppendorf*). Dried pellets were dissolved in 40 µL acetonitrile and 10 µL H20 (MS-grade) and filtered through modified nylon centrifugal filters (modified Nylon, 0.45 µm, VWR). For analysis, sample was loaded onto a C18 column (*Accucore*, *Thermo Fisher*) at 22 °C. Gradient elution was carried out with buffer A (0.1% formic acid in ddH2O; LC-MS grade, *Fisher Analytics*) and buffer B (0.1 % formic acid in acetonitrile; LC-MS grade, *Fisher Analytics*). After 3 min pre-equilibration with 2 % B, protein samples were injected and eluted with a linear gradient from 2 to 98% B over 5.5 min followed by isocratic elution for 1 min at 98% B at a 300 μL/min flow rate. The column was re-equilibrated with 2 % B for 2 min. MS measurements were carried out in positive mode on an Ultimate 3000 RSLC system coupled to a LTQ Orbitrap XL mass spectrometer (*Thermo Scientific*) with ESI ion source (spray voltage: 4 kV, capillary temp.: 275 °C, capillary voltage: 24 V, tube lens: 110 V). Full scan measurements were performed in a range from 100 to 1000 *m*/*z* in centroid mode in the orbitrap at a resolution of 60 000. X.calibur 2.2 Qual Browser was used for calculation of peak areas and quantification. Assay was performed in three biological replicates (n = 3). Per replicate, each data point was normalized to the internal standard caffeine and referenced to t = 0 h (100% stability). Plasma stability was determined by plotting normalized mean stability values of three biological replicates against sampling time in GraphPad Prism 10.

## AGS Adhesion Assay with *H. pylori* 26695

This protocol describes the infection of adherent AGS cells with *H. pylori* 26695 with and without compound addition adapted from literature procedures.[41-43](#_ENREF_41)

Gastric adenocarcinoma cells (AGS) were seeded in 24 well plates (1 × 105 cells per well) and cultured for 24 hours to obtain an attached monolayer. Cells from one well were detached using Trypsin-EDTA (0.25 %) and counted. The medium was aspirated, and cells were washed with PBS to remove antibiotic supplemented media to ensure growth of *H. pylori*. DMEM supplemented with 20% BHI and 10% FCS (500 µL) was used for adhesion assay experiment. *H. pylori* liquid cultures were prepared by inoculating BHI + 10 % FCS medium *with H. pylori* 26695 colonies from WC Dent (*H. pylori* selective) agar plates and then incubated for 24 h (37 °C, 100 rpm, microaerophilic). *H. pylori* strain 26695 was added in a multiplicity of infection (MOI) of 10 to co-culture with AGS. After 2 hours, the medium was aspirated, and the coculture was washed with PBS once to remove non-adherent *H. pylori* cells. DMEM with 10% FCS supplemented with metronidazole or **Metro-P3** in various concentrations (1 µM and 25 µM) was added to each well and incubated for 16 hours at 37°C (5% CO2). DMSO was used as a growth control. The co-culture was washed with PBS three times to remove compound supplemented media, and ddH2O was added to lyse the AGS cells. After 45 minutes, 1:2, 1:10, 1:100 or 1:1000 dilutions of lysed AGS cells were spread on WC Dent agar plates. Colony-forming units of *H. pylori* were counted after 5 days of incubation (37°C, microaerophilic conditions). Experiment was performed in three or four biological independent experiments with technical triplicates per experiment.

## *In vitro* ADME studies

*In vitro* ADME studies comprised the assessment of plasma stability, metabolic stability assay as well as the plasma protein binding of 5-nitroimidazole compounds. These assays were conducted with selected compounds **Metro-P1**, **Metro-P3**, **MF-01**, **MF-02**, **MF-03** and **MF-07** as described previously.[44](#_ENREF_44) Respective samples were analyzed as described in the section ‘HPLC-MS/MS analysis for ADME and PK studies’.

## **Pharmacokinetic (PK) studies**

For pharmacokinetic experiments, outbred male CD-1 mice (Charles River, Germany), 4 weeks old, were used. The animal studies were conducted in accordance with the recommendations of the European Community (Directive 2010/63/EU, 1st January 2013). All animal procedures were performed in strict accordance with the German regulations of the Society for Laboratory Animal Science (GV-SOLAS) and the European Health Law of the Federation of Laboratory Animal Science Associations (FELASA). Animals were excluded from further analysis if sacrifice was necessary according to the humane endpoints established by the ethical board. All experiments were approved by the ethical board of the Niedersächsisches Landesamt für Verbraucherschutz und Lebensmittelsicherheit, Oldenburg, Germany. Compounds, **Metro-P3**, **MF-01**, **MF-02** and **MF-03** were administered at 10 mg/kg perorally (by using a peroral gavage; n=2 per compound). Compounds were dissolved in a formulation containing 10 % DMSO and 90 % PBS. At the time points 0.5, 1, and 3 post administration, up to 25 µL of blood were collected from the lateral tail vein as well as spontaneous urine and feces. At 5 h post administration, mice were euthanized to collect blood from the heart. Whole blood was collected into Eppendorf tubes coated with 0.5 M EDTA and immediately spun down at 15,870 x *g* for 10 min at 4°C. Then, plasma was transferred into a new Eppendorf tube. Plasma, urine and feces samples were stored at -80°C until analysis. Additionally, focused PK studies were conducted for metronidazol, **Metro-P3** and **MF-03** at a dose of 7.1 mg/kg perorally each. During the focused PK studies n=3 CD-1 mice were euthanized per time point (t= 0.5, 1, 2, 4, 8 and 24 hours post administration) to conduct a stomach and a small intestine lavage, to collect, whole blood from the heart, urine, feces, stomach, small intestine and colon. For the stomach lavage the stomach was taken out lavaged with initially 500 µl isotonic sodium chloride solution, followed by 3 ml isotonic sodium chloride solution and finally 500 µl isotonic sodium chloride solution. For the small intestine lavage, the small intestine was taken out and lavaged with 1 ml isotonic sodium chloride solution. The stomachs, small intestines and the colons were put into 3 ml isotonic sodium chloride solution each and homogenized using a Polytron tissue homogenizer at 12,000 rpm.

All PK samples were analyzed via HPLC-MS/MS using an Agilent 1290 Infinity II HPLC system coupled to an AB Sciex QTrap 6500plus or an AB Sciex QTrap 7500 mass spectrometer. First, a calibration curve was prepared by spiking different concentrations of metronidazol, **Metro‑P3**, **MF-01**, **MF-02**, **MF-03** into mouse plasma, mouse urine, mouse feces, isotonic sodium chloride solution, homogenized stomach, homogenized small intestine or homogenized colon from CD-1 mice. Caffeine was used as an internal standard. In addition, quality control samples (QCs) were prepared for metronidazol, **Metro-P3**, **MF-01**, **MF-02**, **MF-03** in the same matrices. For metronidazol, **Metro-P3**, **MF-01**, **MF-02**, **MF-03** the same extraction procedure was used: 7.5 µL of a plasma sample (calibration samples, QCs or PK samples) were extracted with 37.5 µL of a 50:50 mixture of acetonitrile and methanol containing 12.5 ng/mL of caffeine as internal standard for 15 min at 2,000 rpm on an Eppendorf MixMate® vortex mixer. Then, samples were spun down at 13,000 rpm for 10 min. Supernatants were transferred to standard HPLC-glass vials. For urine samples, 15 µL of a sample (calibration samples, QCs or PK samples) were extracted with 35 µL of a 50:50 mixture of acetonitrile and methanol containing 12.5 ng/ml of caffeine as internal standard for 15 min at 2000 rpm on an Eppendorf MixMate® vortex mixer. Then samples were spun down at 13.000 rpm for 10 min. Supernatants were transferred to standard HPLC-glass vials. For feces (calibration samples, QCs or PK samples) equal amounts of a feces portion were diluted with 200 µL water containing 10 % MeOH and put on a ultrasonic batch at 35 kHz for 2 × 20 min. Then, 15 µL of the sample were extracted with 25 µL of a 50:50 mixture of acetonitrile and methanol containing 12.5 ng/mL of caffeine as internal standard for 5 min at 2000 rpm on an Eppendorf MixMate® vortex mixer. Then samples were spun down at 13,000 rpm for 10 min. Supernatants were transferred to standard HPLC-glass vials. For stomach lavage, stomach, small intestine, colon and small intestine lavage (calibration samples, and QCs (of the respective matrix) or PK samples), 50 µL of a sample was extracted with 50 µL of a 50:50 mixture of acetonitrile and methanol containing 12.5 ng/mL of caffeine as internal standard for 15 min at 800 rpm on an Eppendorf MixMate® vortex mixer. Then samples were spun down at 4,000 rpm for 20 min. Supernatants were transferred to Greiner® V-bottom plates and sealed with a mat.

## HPLC-MS/MS Analysis for ADME and PK Studies

HPLC conditions were as follows: column: Agilent Zorbax Eclipse Plus C18, 50 × 2.1 mm, 1.8 µm; temperature: 30°C; injection volume: 1 µL; flow rate: 700 µL/min; solvent A: water + 0.1 % formic acid; solvent B: acetonitrile + 0.1 % formic acid; gradient for **Metro-P1**, **Metro-P3**, **MF-01**, **MF-02**, **MF-03** and **MF-07**: 99 % A at 0 min, 99 % - 50% A from 0.1 min to 3.5 min, 50 - 0 % A from 3.5 min to 3.8 min, 0 % A until 4.7 min. Mass spectrometric conditions were as follows: Scan type: Q1 and Q3 masses for caffeine, glipizide, metronidazole, **Metro-P1**, **Metro-P2**, **MF-01**, **MF-02**, **MF-03** and **MF-07** can be found in **Table S16** and **Table SX**; peak areas of each sample and of the corresponding internal standard were analyzed using MultiQuant 3.0 software (AB Sciex). Peaks of PK samples were quantified using the calibration curve. The accuracy of the calibration curve was determined using QCs independently prepared on different days. PK parameters were determined using a non-compartmental analysis with PKSolver[45](#_ENREF_45). HPLC-MS/MS conditions for verapamil, naproxen, procaine, procainamide and propoxycaine (control compounds of the *in vitro* ADME assays) were used as described previously.[44](#_ENREF_44)

**Table S 17**: Mass spectrometric conditions of analytes for ADME and PK studies.

| ID | Q1 Mass [Da] | Q3 Mass [Da] | time [msec] | DP [volts] | CE [volts] | DXP [volts] |
| --- | --- | --- | --- | --- | --- | --- |
| caffeine | 195.024 | 138.0  110.0 | 20  20 | 130  130 | 25  31 | 14  18 |
| Metro-P1 | 209.912 | 128.0  82.8  43.0 | 20  20  20 | 56  56  56 | 17  15  37 | 20  12  14 |
| Metro-P3 | 195.872 | 140.0  55.0  41.9 | 20  20  20 | 11  11  11 | 15  27  73 | 16  6  18 |
| MF-01 | 185.900 | 59.1  128.0  31.1 | 20  20  20 | 51  51  51 | 17  15  35 | 8  20  14 |
| MF-02 | 171.897 | 140.0  55.0  42.0 | 20  20  20 | 26  26  26 | 15  23  63 | 18  8  10 |
| MF-03 | 199.889 | 73.0  44.9  128.0 | 20  20  20 | 1  1  1 | 17  37  17 | 8  10  14 |
| MF-07 | 211.894 | 85.0  41.0  168.1 | 20  20  20 | 51  51  51 | 17  49  15 | 24  12  20 |
| glipizide | 443.936 | 170.100 | 150 | -40 | -7 | -66 |

**Table S 18**: Mass spectrometric conditions of analytes using QTrap 7500.

| ID | Q1 Mass [Da] | Q3 Mass [Da] | time [msec] | CE [volts] | CXP [volts] |
| --- | --- | --- | --- | --- | --- |
| caffeine | 195.050 | 100.933  116.849 | 10  10 | 12.0  10.0 | 10.0  7.0 |
| metronidazol | 172.062  170.066 | 82.062  128.061  44.998  111.034  109.946  126.066  79.972  140.069 | 10  10  10  10  10  10  10  10 | 35.0  20.0  35.0  36.0  -21.0  -11.0  -40.0  -11.0 | 4.0  3.0  17.0  17.0  -7.0  -24.0  -10.0  -8.0 |
| MF-03 | 200.050 | 45.031  73.050  128.038  103.959 | 10  10  10  10 | 29.0  19.0  18.0  15.0 | 12.0  12.0  12..0  18.0 |
| Metro-P3 | 196.046 | 140.024  55.052  42.034  110.053  163.926 | 10  10  10  10  10 | 16.0  65.0  65.0  22.0  10.0 | 35.0  35.0  5.0  5.0  5.0 |

## *In vivo* Efficacy Studies in Murine Model

Female C57BL/6 wild-type mice (*Envigo*) were housed under specific pathogen-free conditions and were fed *ad libitum*. Six- to eight-week-old mice were infected with *H. pylori* SS1 by oral gavage with 2*108 bacteria resuspended in 200 µL BHI with 20% FCS. Mice were infected twice with *H. pylori* at a time interval of two days. After a stable infection was established (6-8 weeks), mice were treated with different antibiotic triple therapies by oral gavage twice a day for 7 days: metronidazole or **Metro-P3** (14.2 mg/kg/day) or **Metro-P3** (0.02 × 14.2 mg/kg/day = 0.30 mg/kg/day or **MF-01** (0.02 × 14.2 mg/kg/day = 0.30 mg/kg/day) with clarithromycin (7.15 mg/kg/day) or clarithromycin only (control group, 7.15 mg/kg/day). One hour before antibiotic treatment, mice were administered proton pump inhibitor omeprazol (400 µmol/kg/day). One group was not treated with antibiotics as a positive colonization control group for CFU determinations. Two weeks after antibiotic treatment, mice were sacrificed by cervical dislocation and colonization was analyzed by plating serial dilutions of stomach tissue. For this, a longitudinal piece of stomach was weighed and homogenized in 1 mL BHI + 20% FCS with a bead mill (Precellys 24, 5000 rpm, 2 × 45 s, 5 s breaks). Serial dilutions (*H. pylori* SS1: 1:102, 1:103, 1:104) in BHI + 20% FCS were prepared and plated on WC-dent blood agar plates supplemented with bacitracin (200 μg/ml), nalidixic acid (10 μg/ml), and polymyxin B (3 μg/ml). After 5 days of culture, CFU’s were counted and optionally expanded on WC-dent plates for 2 days and then frozen for later use. All experiments were approved by the Bavarian Government (Regierung von Oberbayern, ROB-55.2-2532.Vet_02-23-90) and conducted in compliance with European guidelines for the care and use of laboratory animals.

*In vivo* efficacy studies in C57BL/6 mice infected with *H. pylori* SS1 strain and treatment with different regimens: No treatment (n = 7), clarithromycin only (C only, n = 6), triple therapy with low dose of **Metro-P3** (0.02 × **Metro**; n = 4) or **MF-01** (0.02 × **Metro**; n = 5), standard triple therapy with **Metro** (n = 6) or **Metro-P3** (1 × **Metro**, n = 5). Statistical significance was determined by nonparametric Kruskal-Wallis test with multiple comparisons (no correction) to control column (no treatment).

## Microbiome Analysis

*DNA extraction*

DNA extractions from collected fecal samples were adapted from *Turnbaugh* et al., 2009 (Isoamyl alcohol extraction (PCI)) and from *Zoetendal* et al., 2006 (ethanol precipitation). In brief, an aliquot (≤ 200mg) of each sample was suspended, while frozen, in a solution containing 500 µL of freshly prepared extraction buffer (200 mM Tris, 200 mM NaCl, 20 mM EDTA, pH = 8.0), 200 µL of 20% SDS, and 500 µL of a mixture of phenol:chloroform:isoamyl alcohol (25:24:1) in 2 mL VK05 Precellys tubes containing 0.5 mm glass beads (Bertin Technologies, France). Next, Bertin 24 homogenizer (Bertin Technologies, France) was run at 5000 rpm (2 cycles of 45s with a pause of 5s in between) to lyse the microbial cells. This was followed by extraction with the PCI method, and precipitation with 3M sodium acetate (pH = 5.2), and cold ethanol (99%, molecular grade stored at -20°C). DNA pellets at the end of the protocol were dissolved in 200 µL TE buffer (pH = 8.0, heated to 70°C).

*PCR and library preparation*

To target bacterial DNA, the V3/V4 region of the 16S rRNA gene was amplified in 25 cycles from 1-2 µL of aliquoted working stocks of DNA using primers 341F-ovh and 785R-ovh (Klindworth et al., 2013). AMPure XP magnetic beads (Beckmann Coulter Life Sciences, Germany) were used for purification of the amplicons according to Illumina’s 16S Metagenomic Sequencing Library Preparation guide. Samples were indexed with Nextera XT indices (Illumina) in a paired fashion for 8 cycles of PCR, followed by a second purification with AMPure XP beads. Indexed samples were pooled in an equimolar amount (4 nM), adjusted to final concentration of 4 pM, and sequenced on a MiSeq system (Illumina) in a paired-end reaction of 600 cycles using the MiSeq reagent kit v3 (Illumina). A 20% (v/v) spike-in of the PhiX standard library at 4 pM was additionally included. As a control to check for artifacts, a single negative control (PCR with nuclease-free water as template DNA) as well as a positive control using a mock community (ZymoBIOMICS, No. D6300, Freiburg, Germany) were included throughout each sequencing run.

Primers

| Name | Sequence 5’ > 3’ |
| --- | --- |
| 341F-ovh | TCGTCGGCAGCGTCAGATGTGTATAAGAGACAG CCTACGGGNGGCWGCAG |
| 785R-ovh | GTCTCGTGGGCTCGGAGATGTGTATAAGAGACAG GACTACHVGGGTATCTAATCC |

Underlined portions indicate the Illumina-specific adapter overhang sequences (16S Metagenomic Sequencing Library Preparation, Illumina). Non-underlined portions target the 16S rRNA V3/V4 region, as designed and reported in A. Klindworth et al., 2013)

*Bioinformatics analysis*

The output was obtained from the sequencing in a compressed and demultiplexed fastq.gz file format and was processed using the QIIME2 platform (v 2024.5) (Bolyen et al., 2019). Firstly, overhang adaptor and primer sequences were trimmed from the paired-end reads using Cutadapt plugin (Martin 2011). These were then filtered, denoised, and checked for chimeras before ASV assignment using the DADA2 plugin (Callahan et al., 2016). Taxonomic classification was assigned in the QIIME2 pipeline using the classify-sklearn algorithm under feature-classifier plugin against a pre-trained classifier based on the Greengenes2 2024.9 release (McDonald et al., 2024). Each sample was rarefied to 12,409 sequences (size of the smallest sample) for further downstream analyses like calculation of richness, diversity, and community compositional indices and matrices. Statistical tests were performed in R (R Foundation for Statistical Computing, Vienna, Austria; <https://www.r-project.org/>) and statistical significance was determined by nonparametric Kruskal-Wallis test with multiple comparisons (no correction) to control column in GraphPad Prism 10.

# NMR Spectra

**Metro-P1**


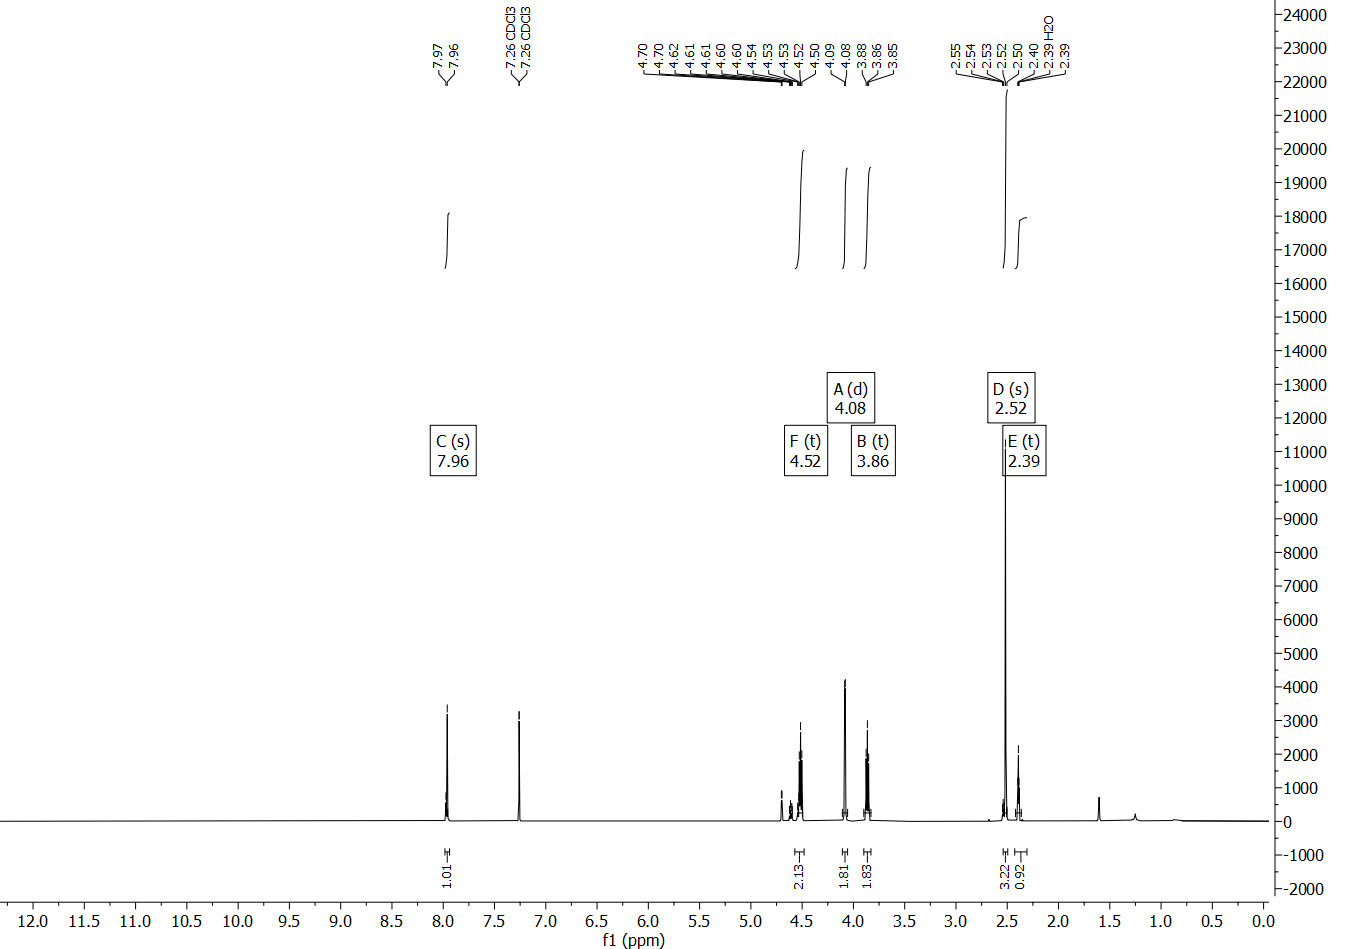

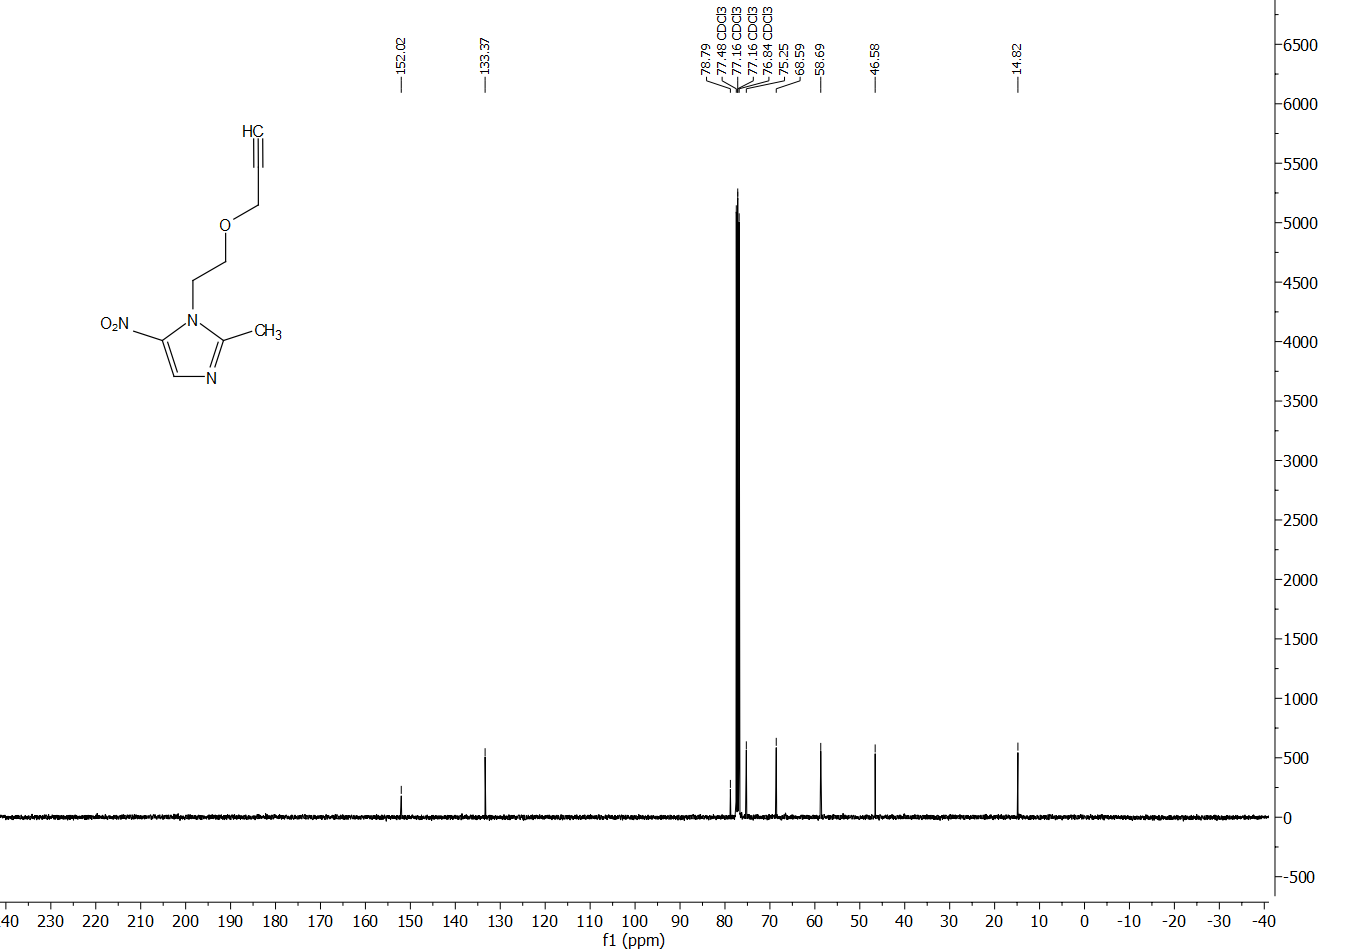


**Figure S 27**: 1H and 13C NMR spectra of **Metro-P1**.

**Aldehyd 1**


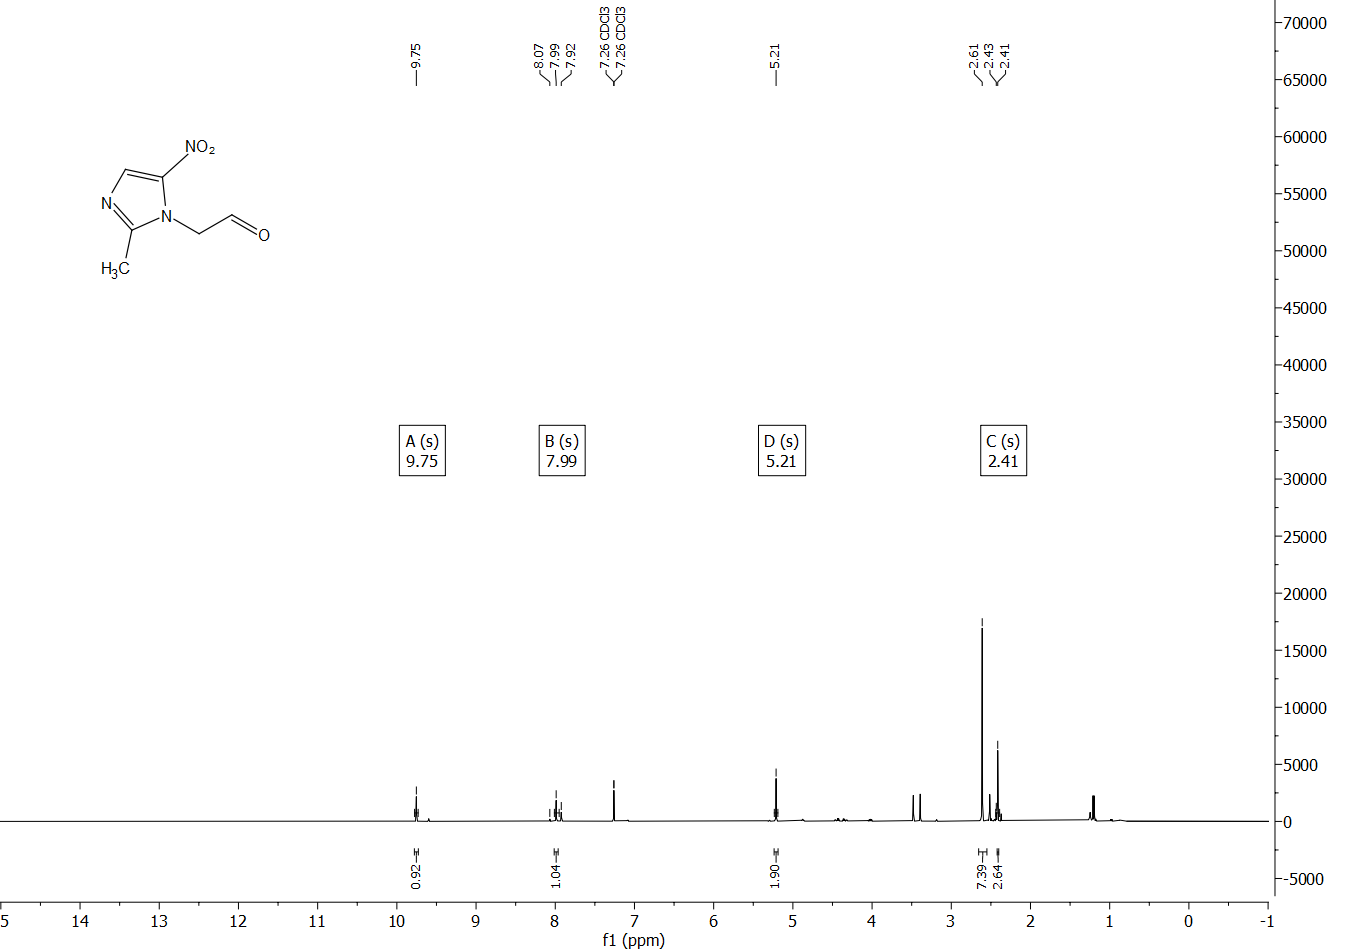

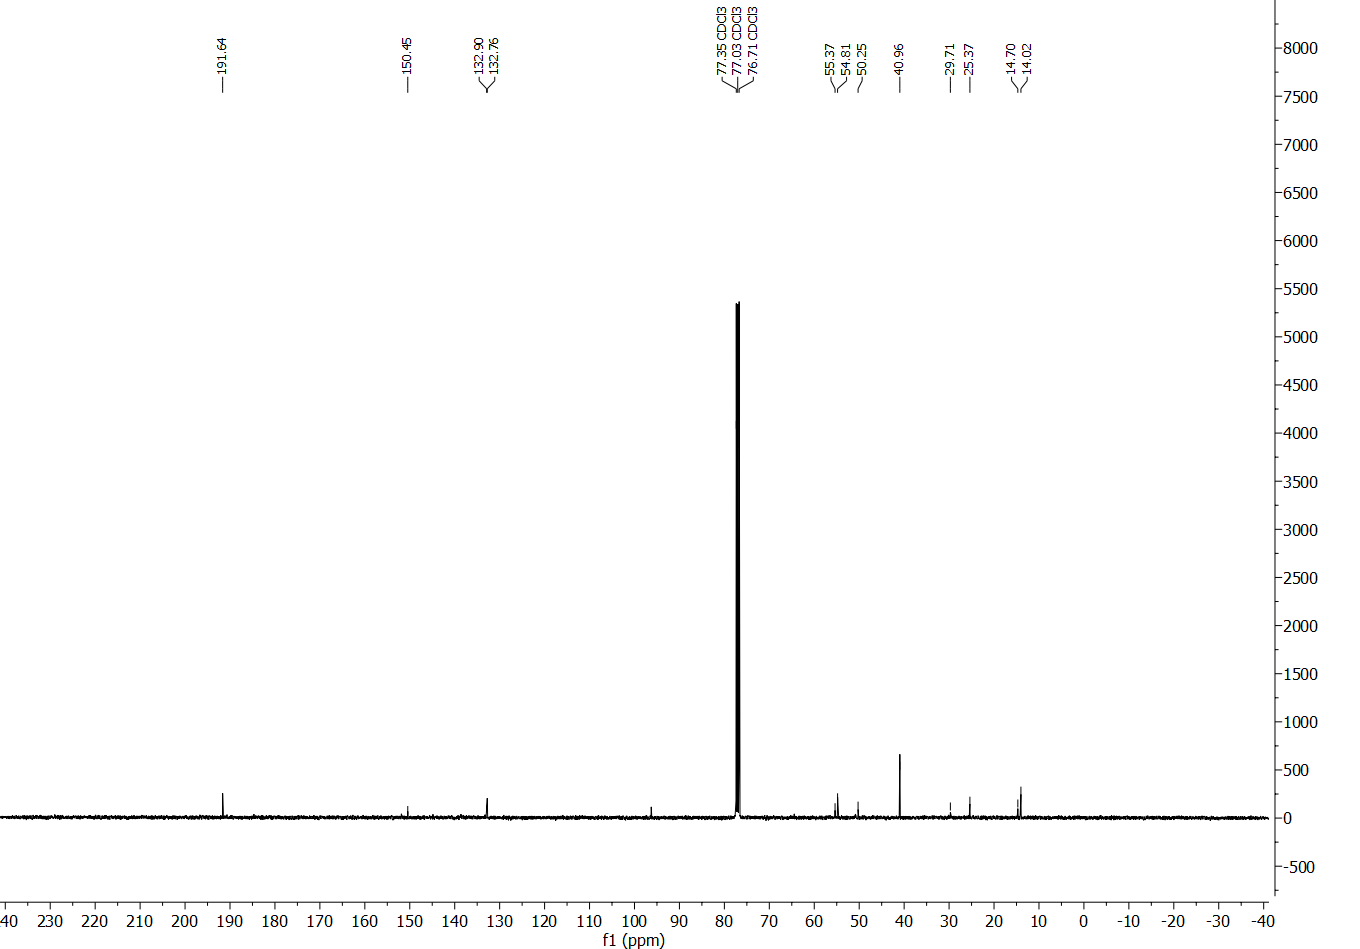


**Figure S 28**: 1H and 13C NMR spectra of aldehyde 1.

**Metro-P2**


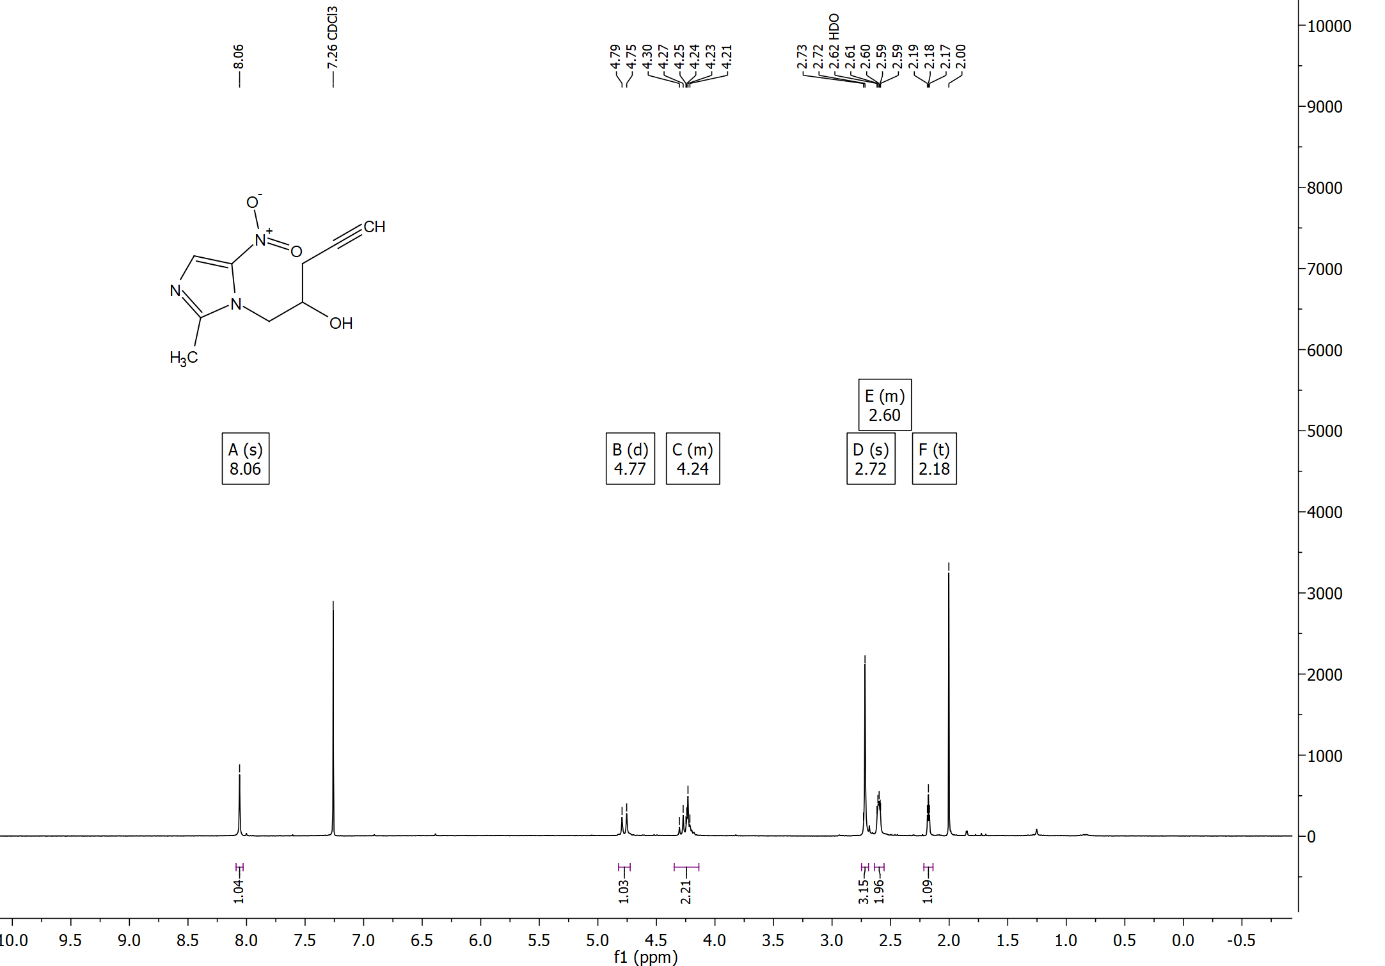

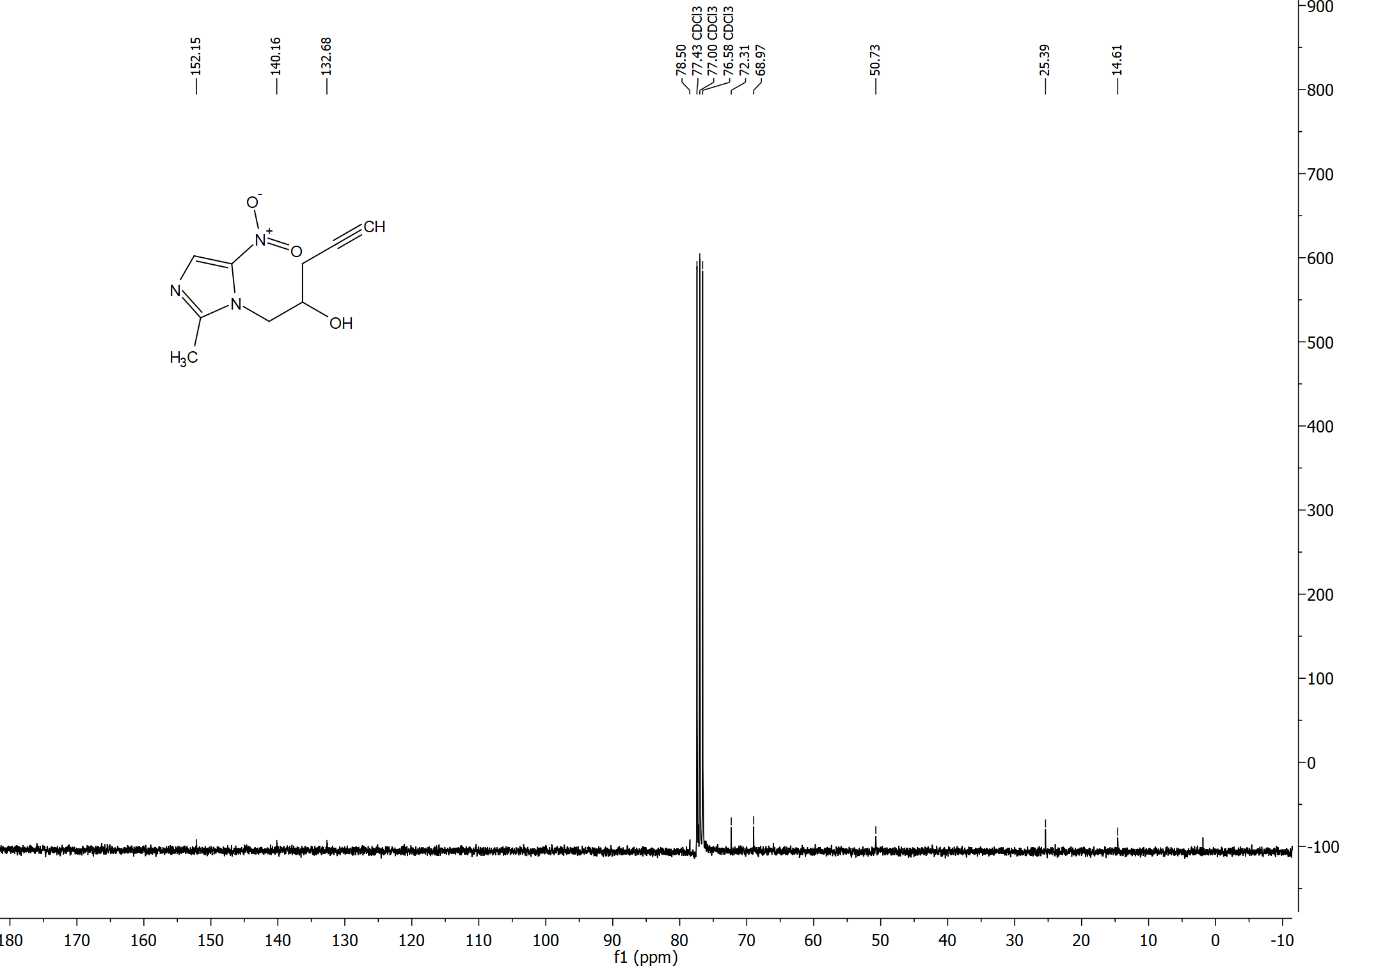


**Figure S 29**: 1H and 13C NMR spectra of Metro-P2.

**Metro-P3**


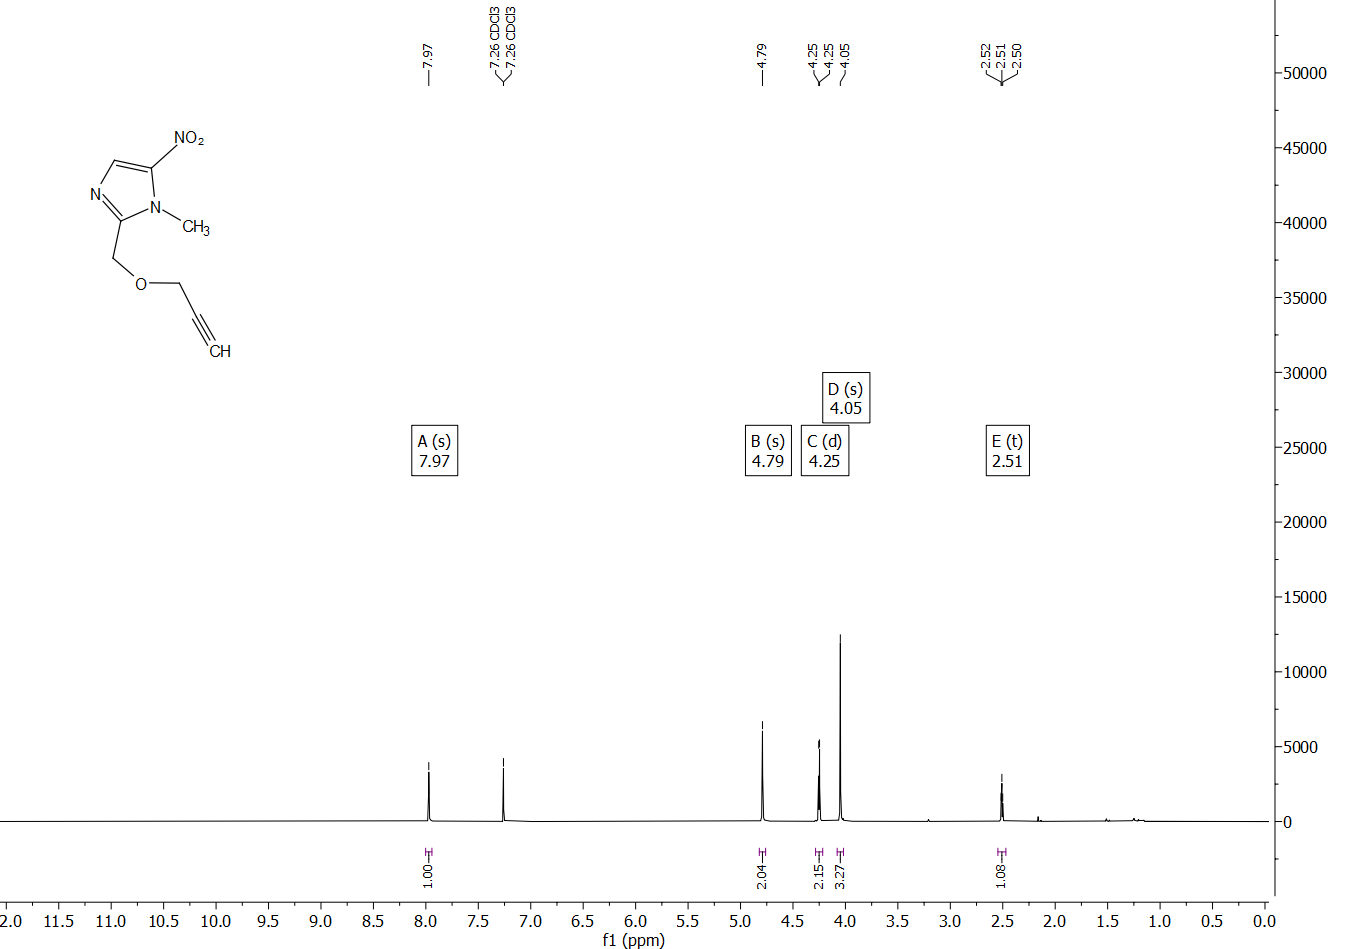

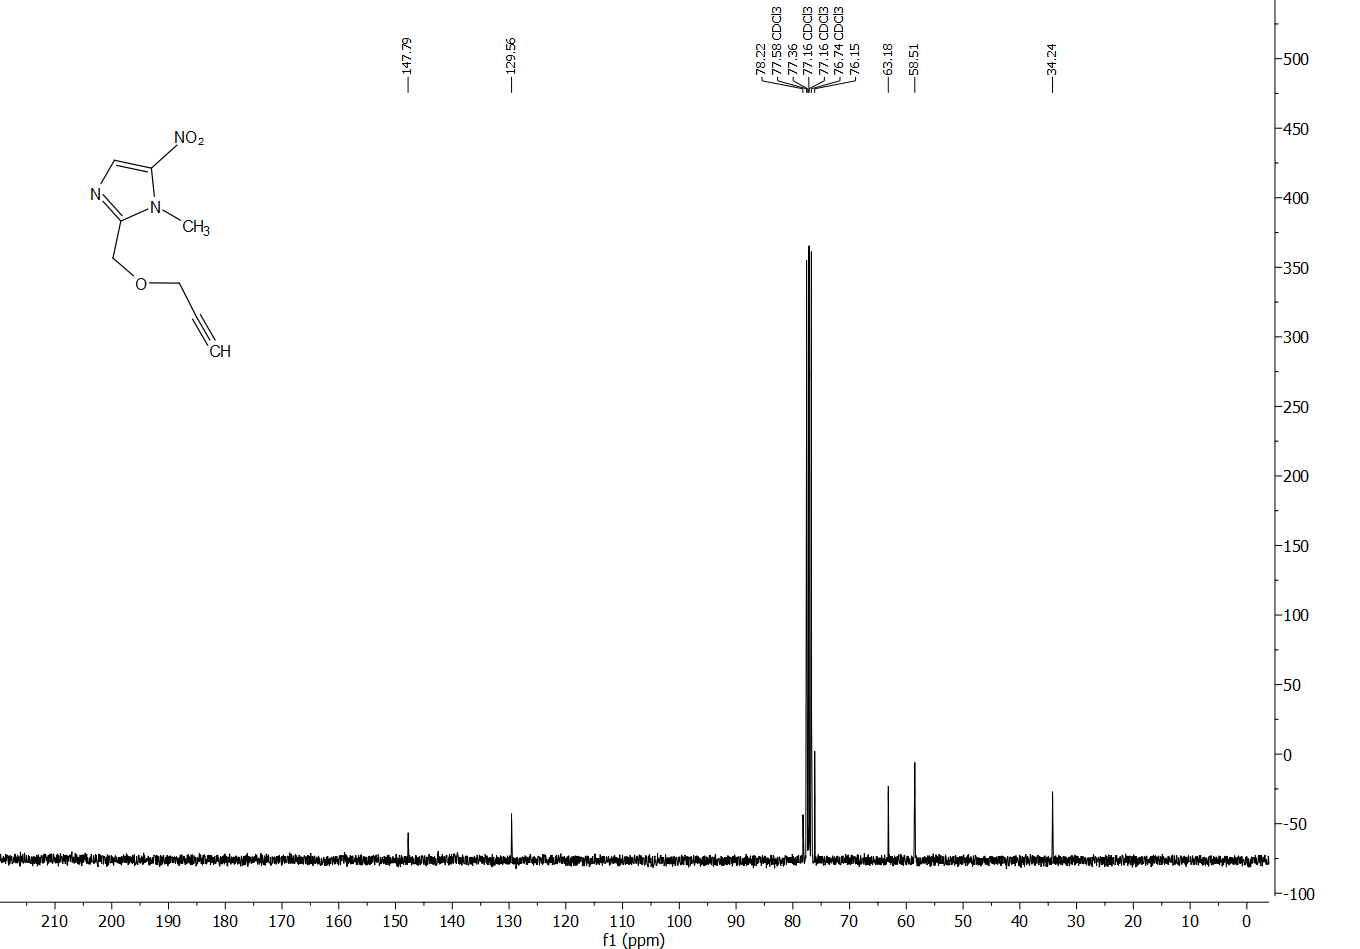


**Figure S 30:** 1H and 13C NMR spectra of **Metro-P3**.

**Metro-P4**


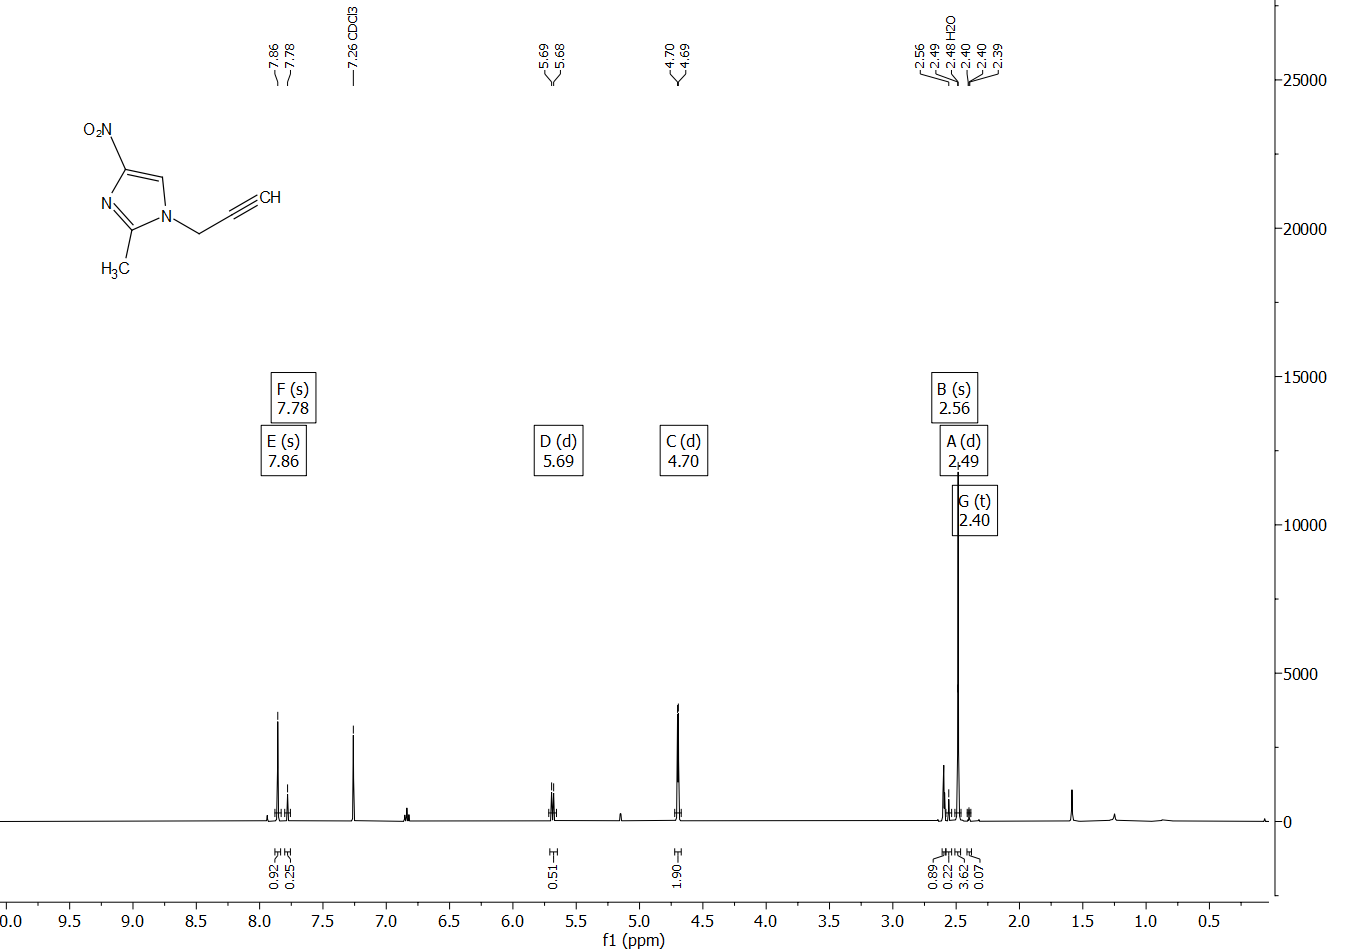

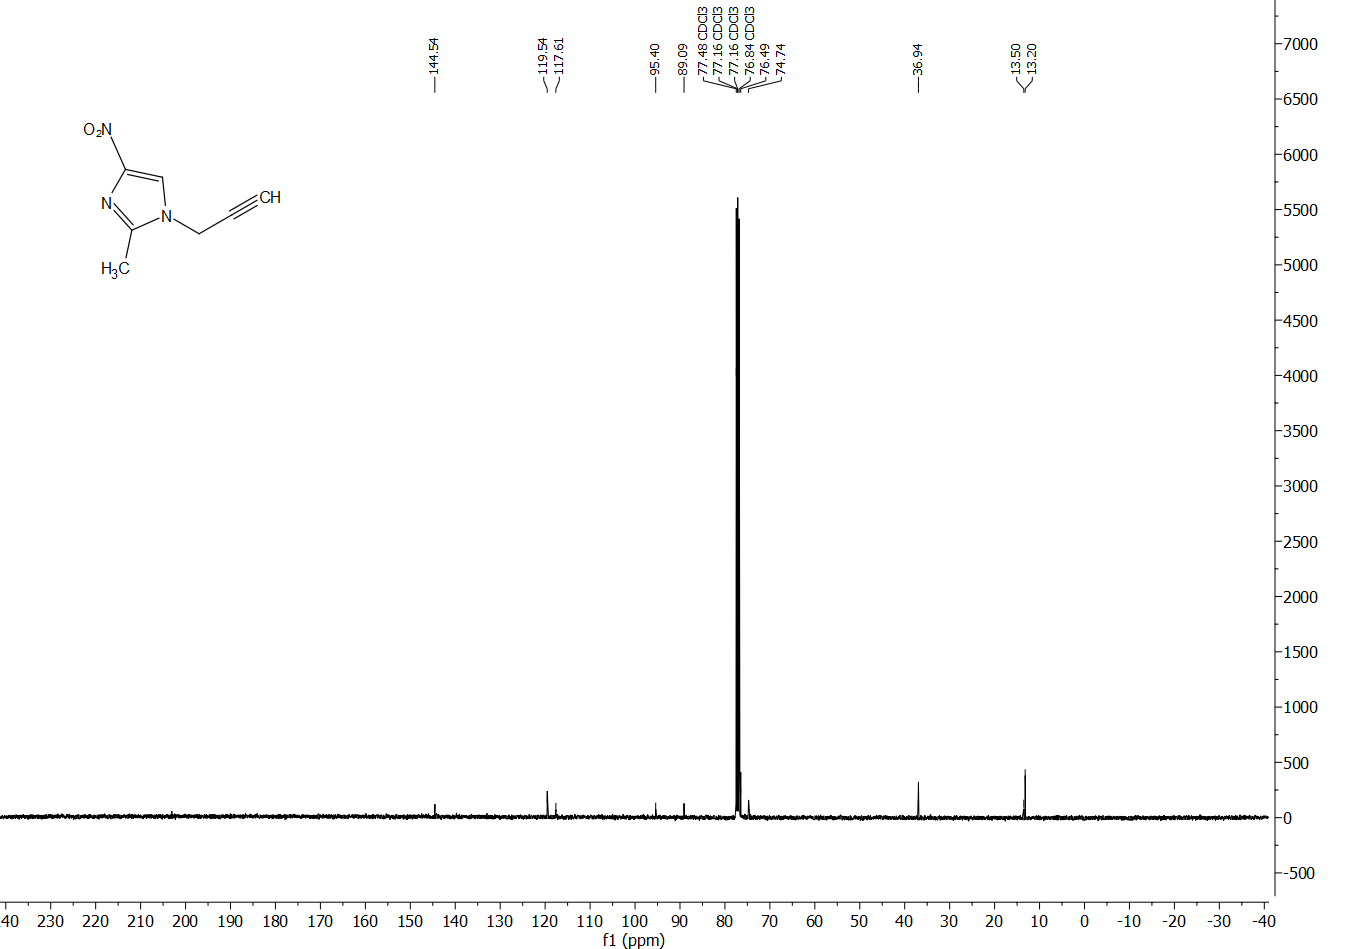


**Figure S 31**: 1H and 13C NMR spectra of **Metro-P4**.

**MF-01**

**
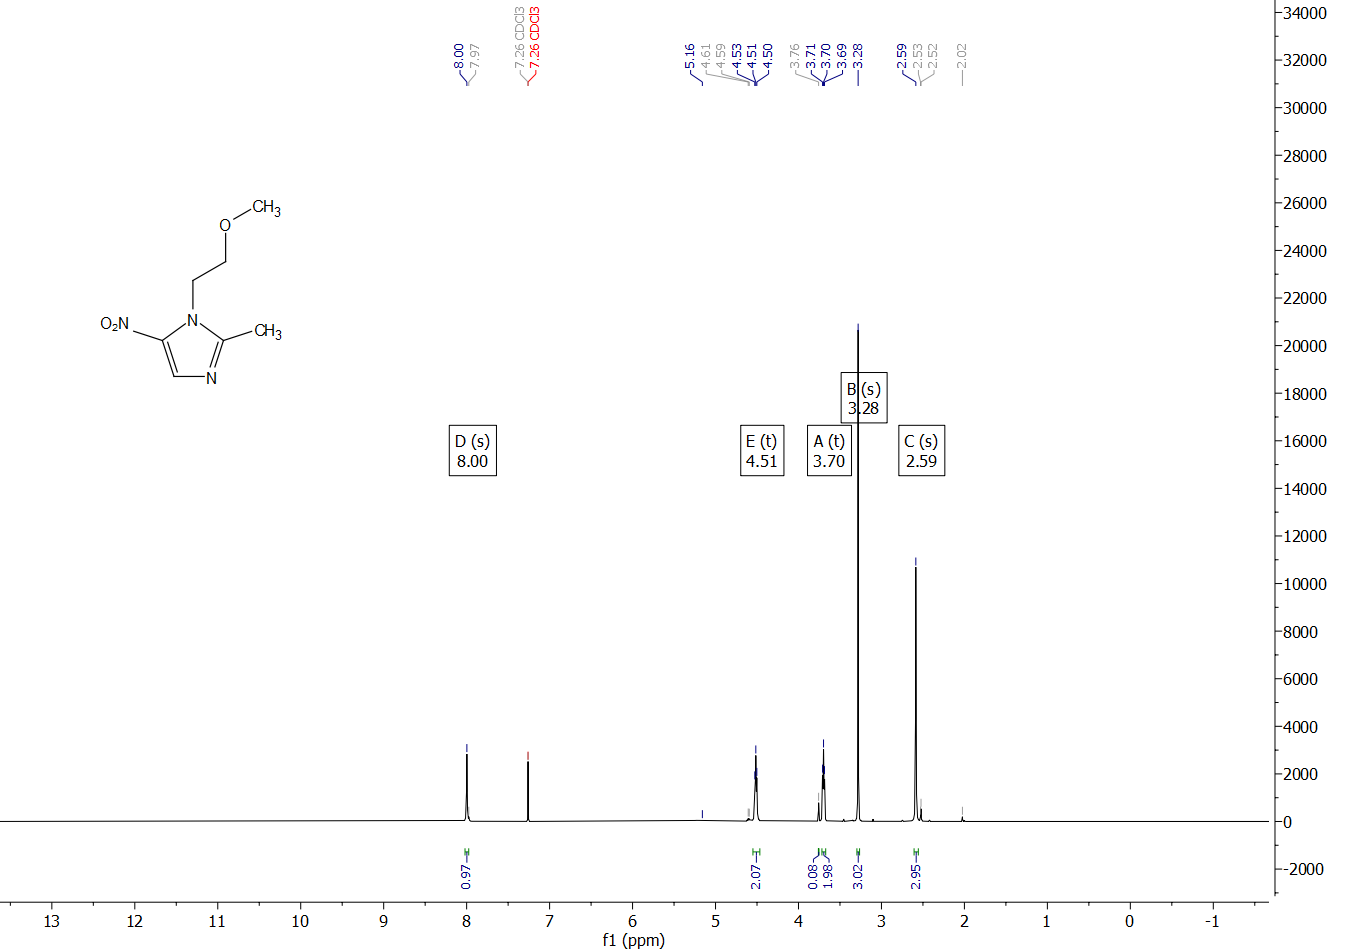

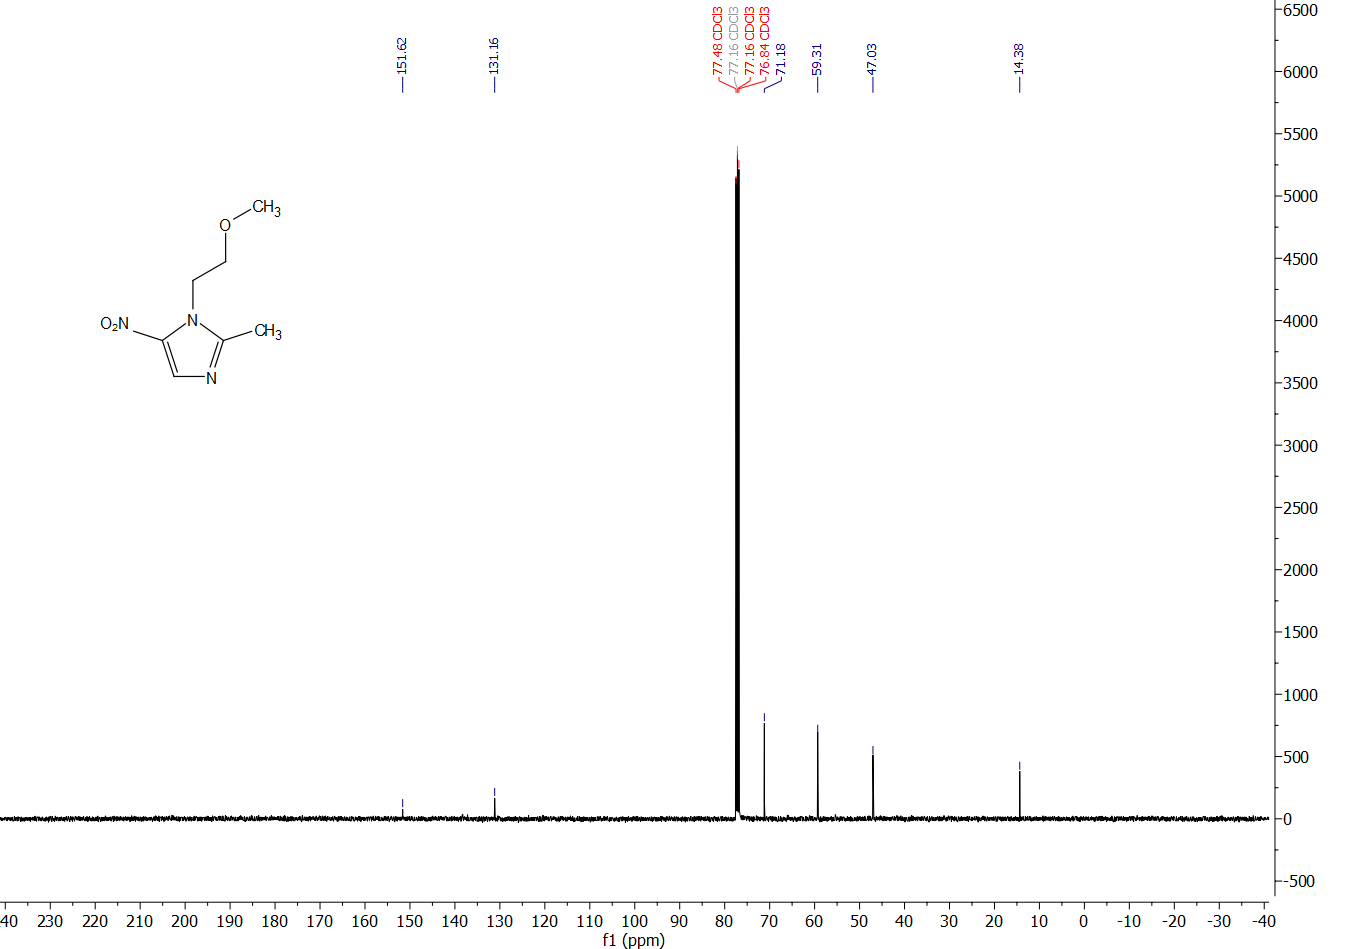
**

**Figure S 32**: 1H and 13C NMR spectra of **MF-01**.

**MF-02**

**
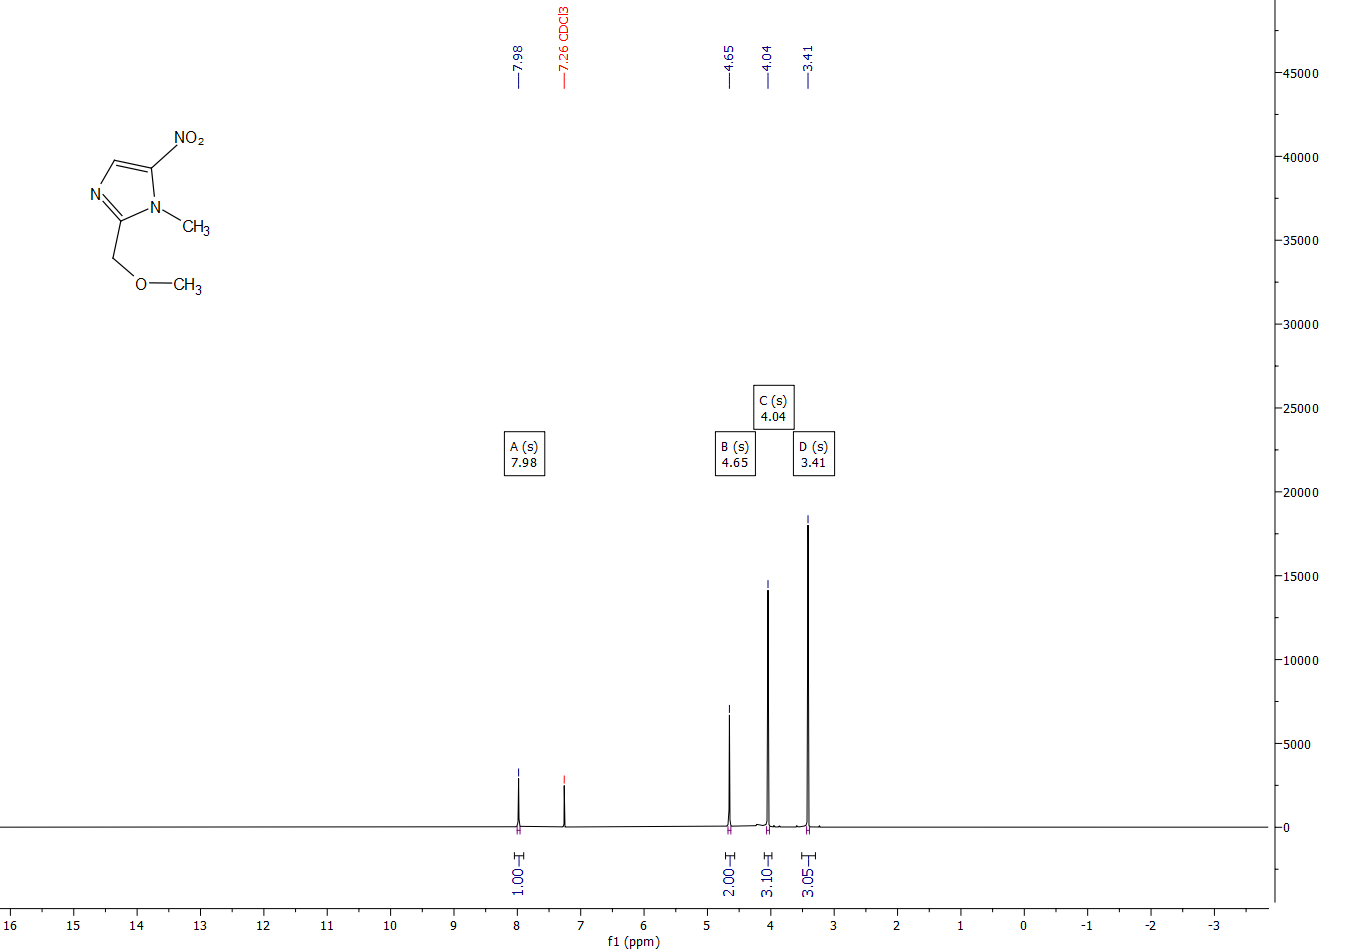

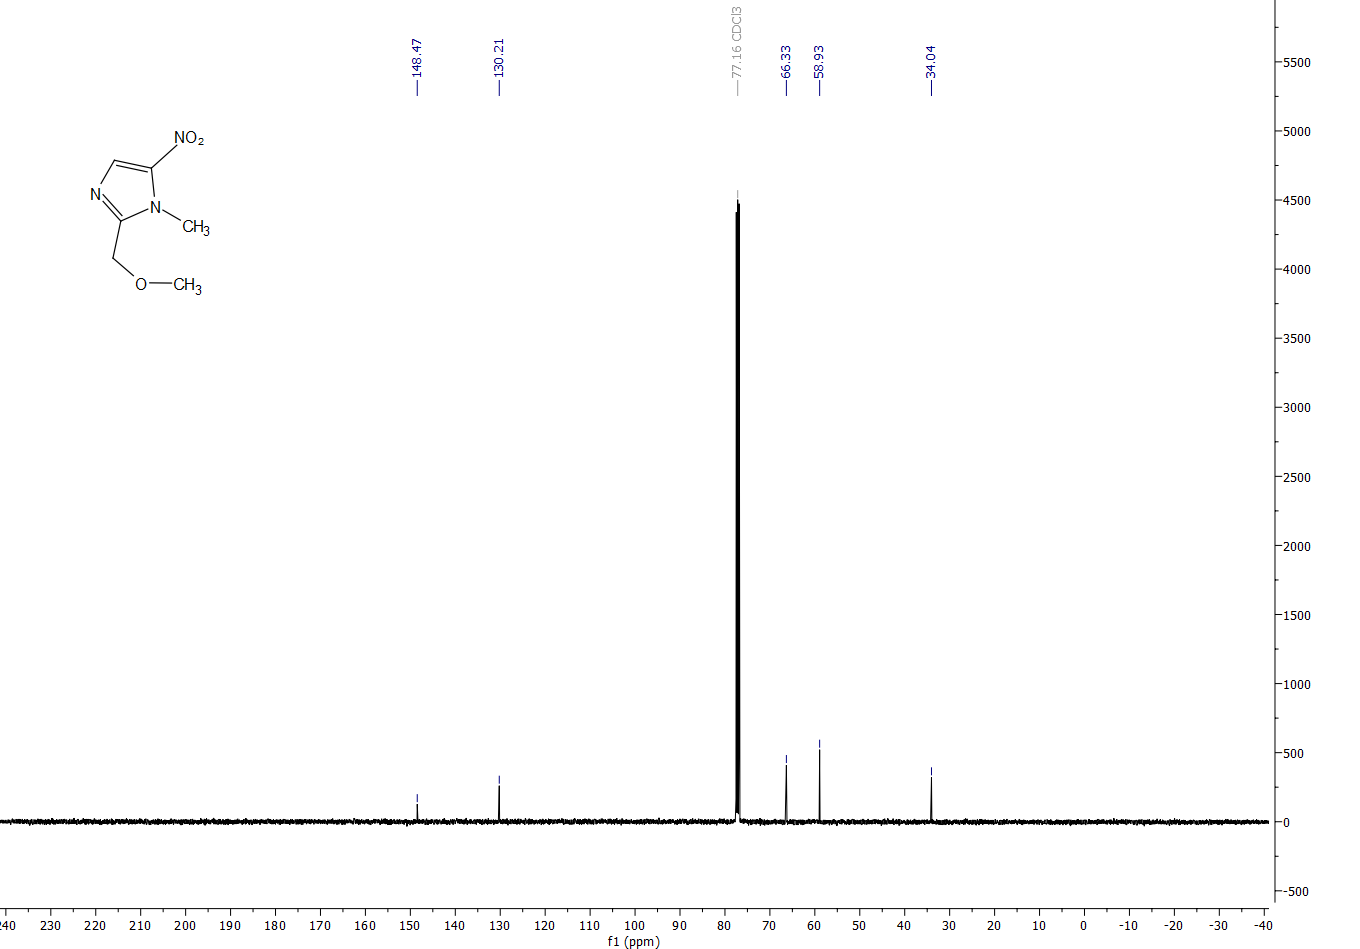
**

**Figure S 33**: 1H and 13C NMR spectra of **MF-02**.

**MF-03**


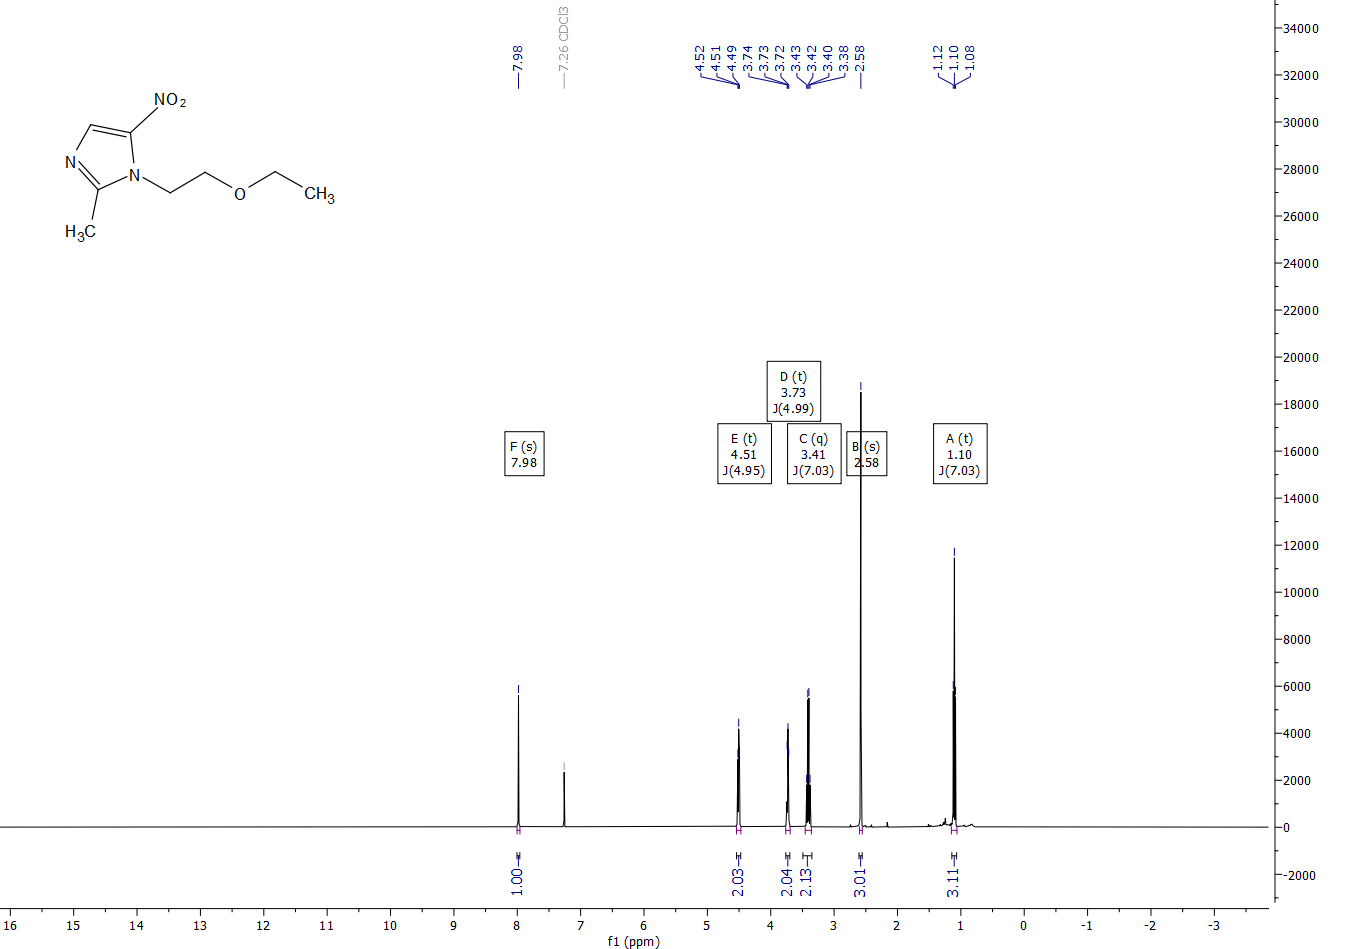

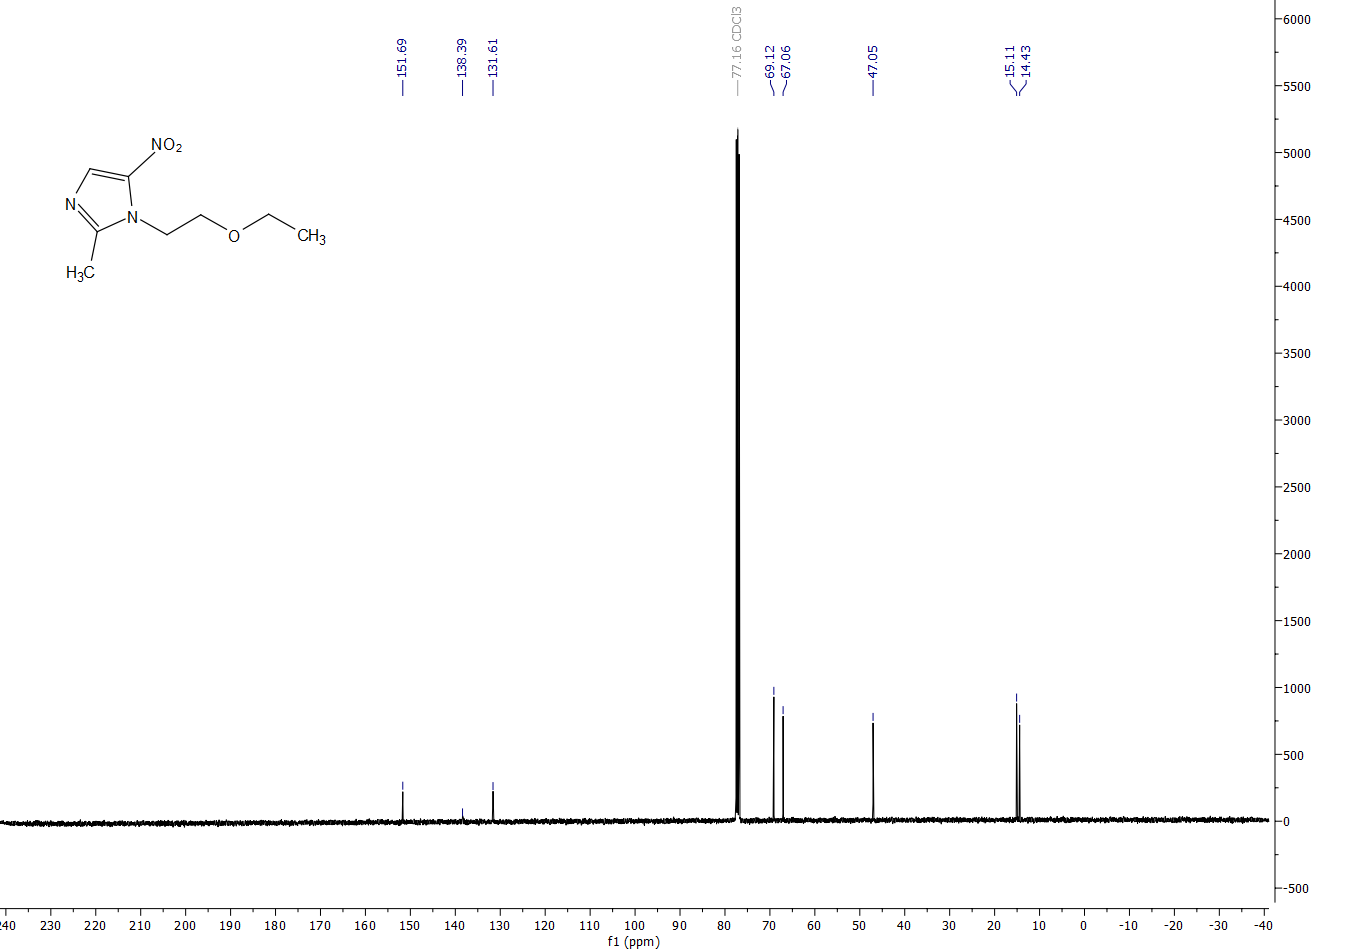


**Figure S 34**: 1H and 13C NMR spectra of **MF-03**.

**MF-04**


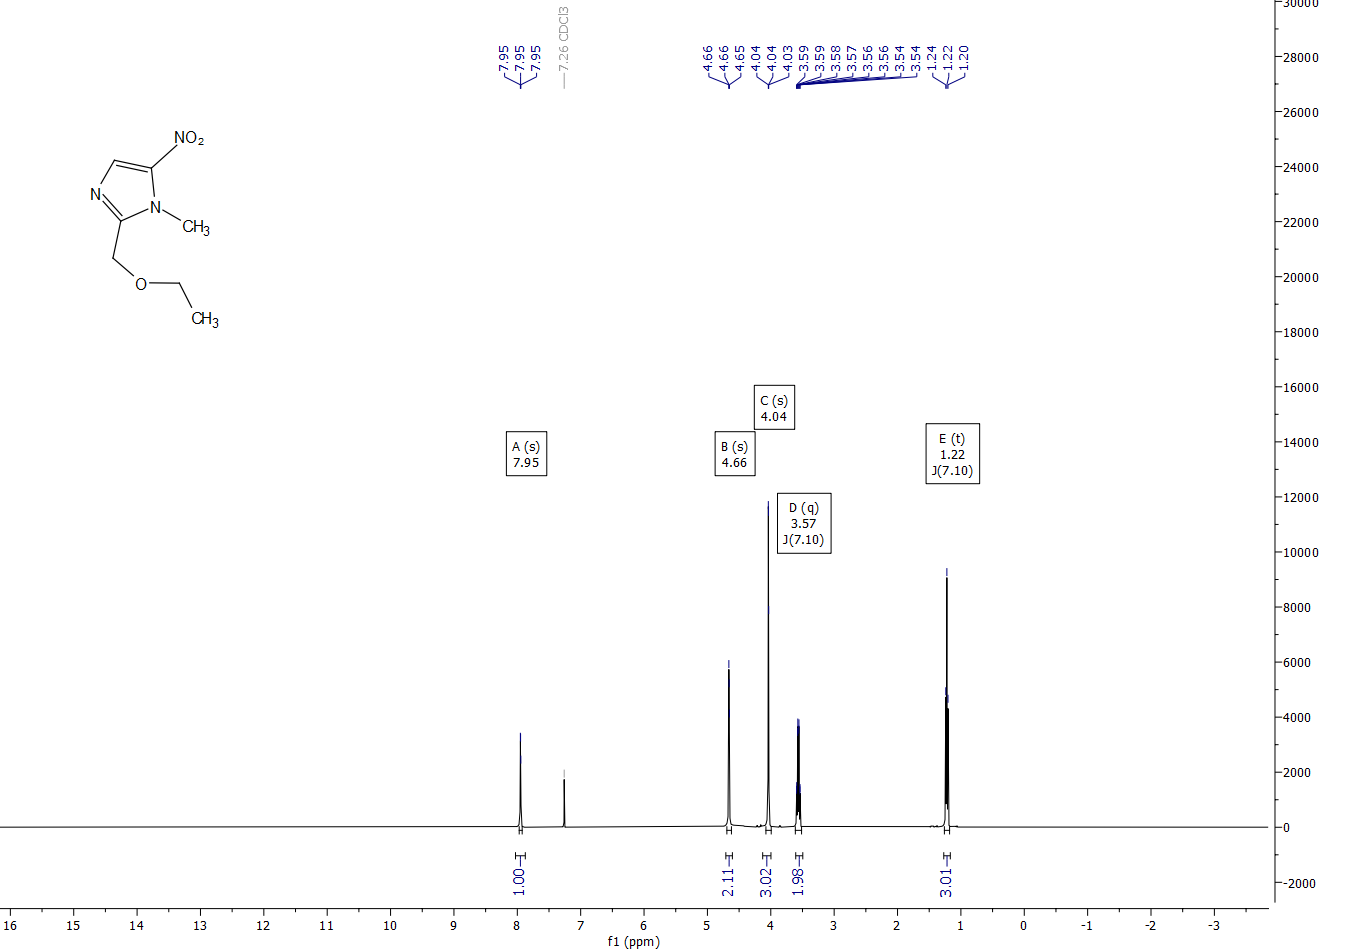

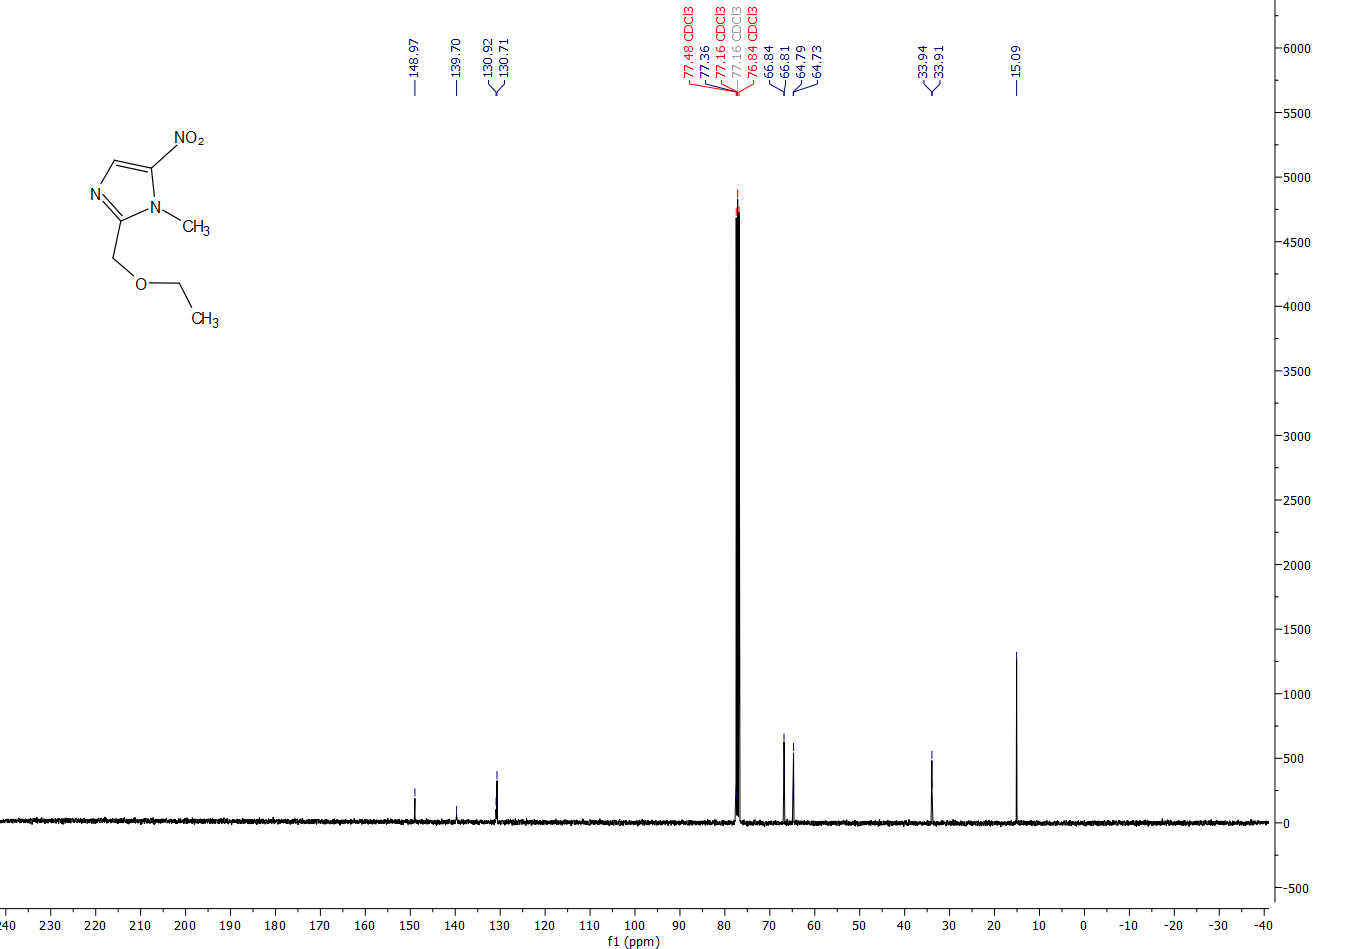


**Figure S 35**: 1H and 13C NMR spectra of **MF-04**.

**MF-05**

**
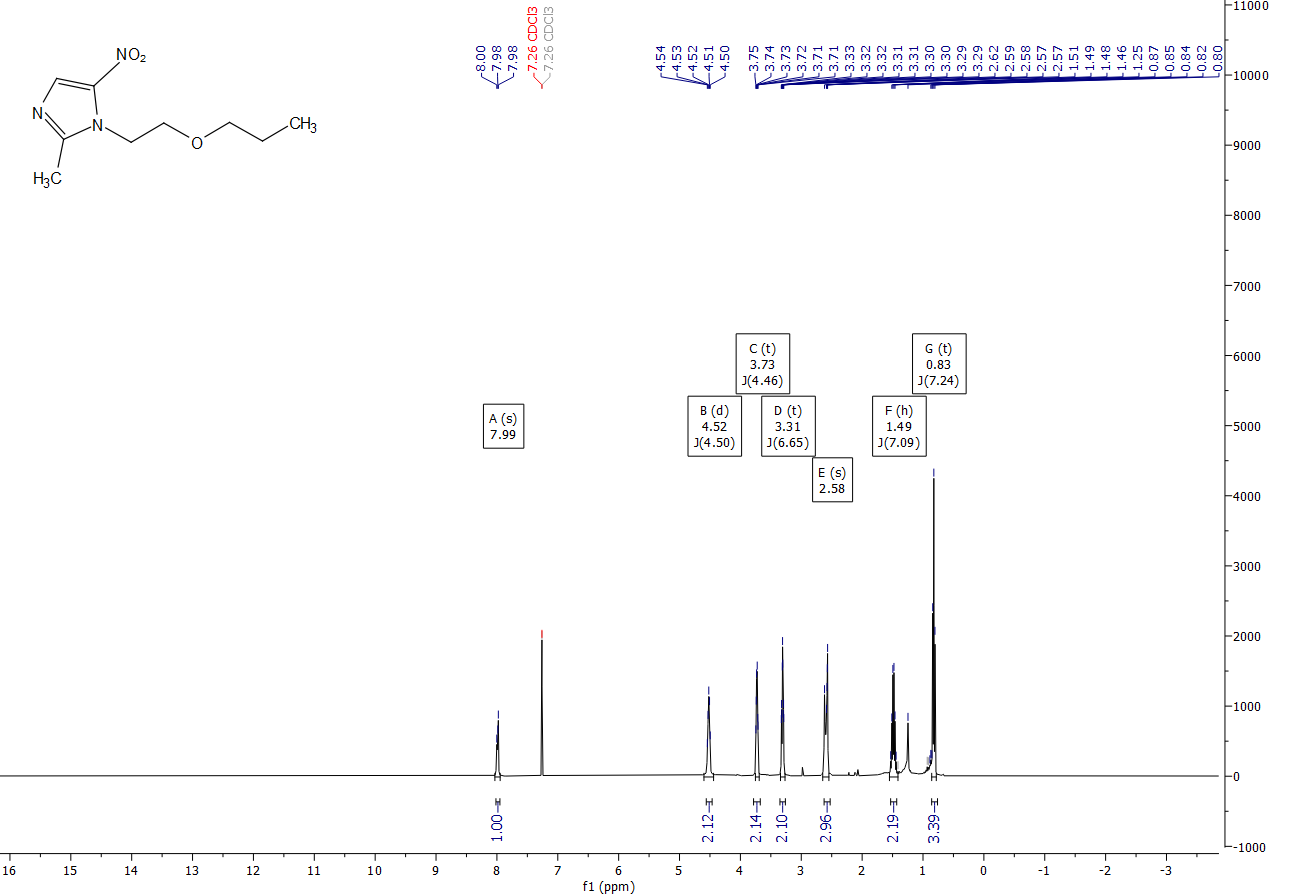

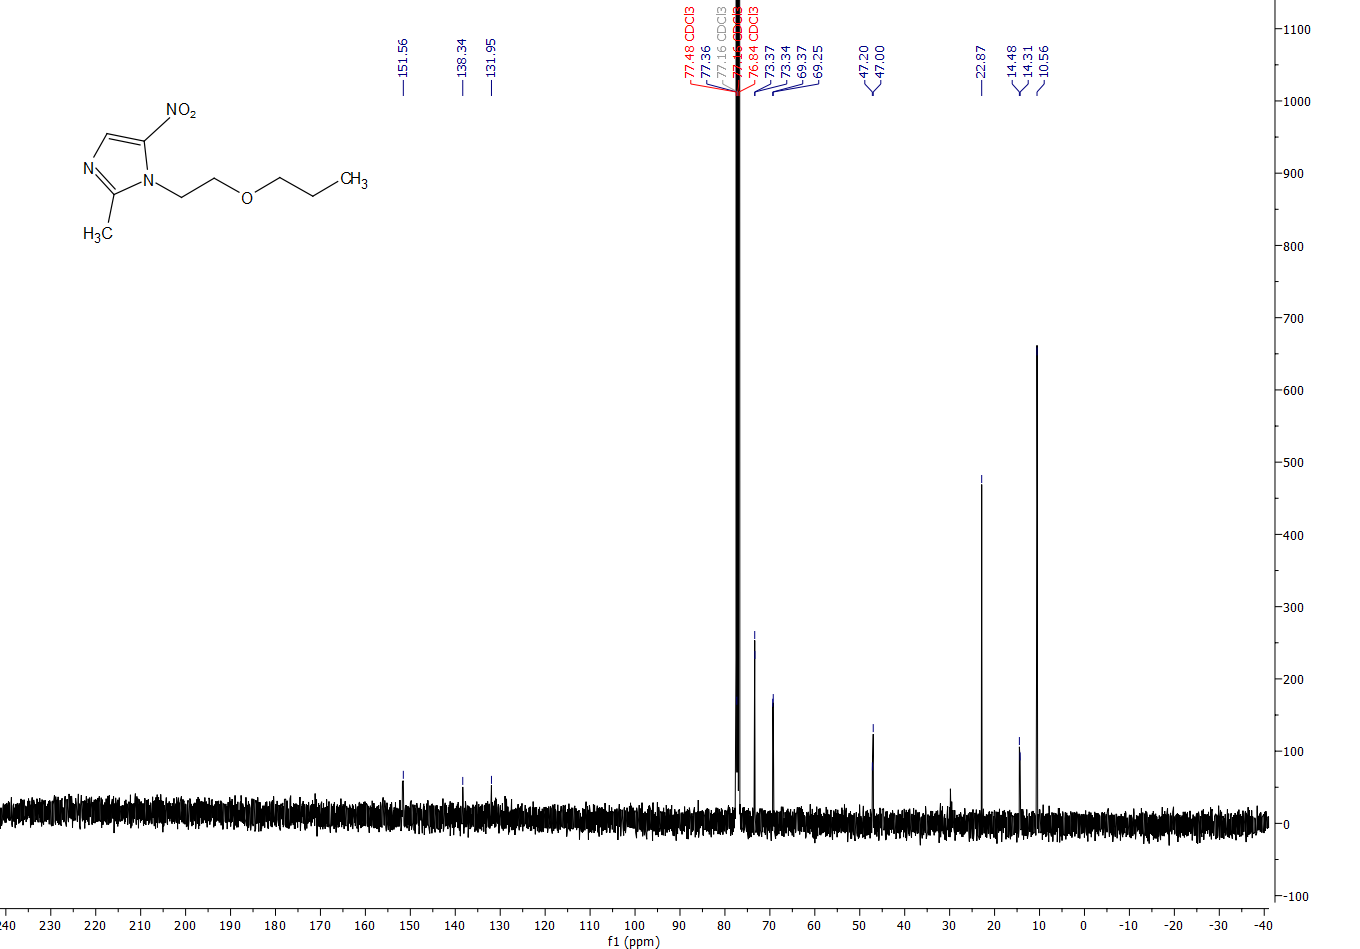
**

**Figure S 36**: 1H and 13C NMR spectra of **MF-05**.

**MF-06**

**
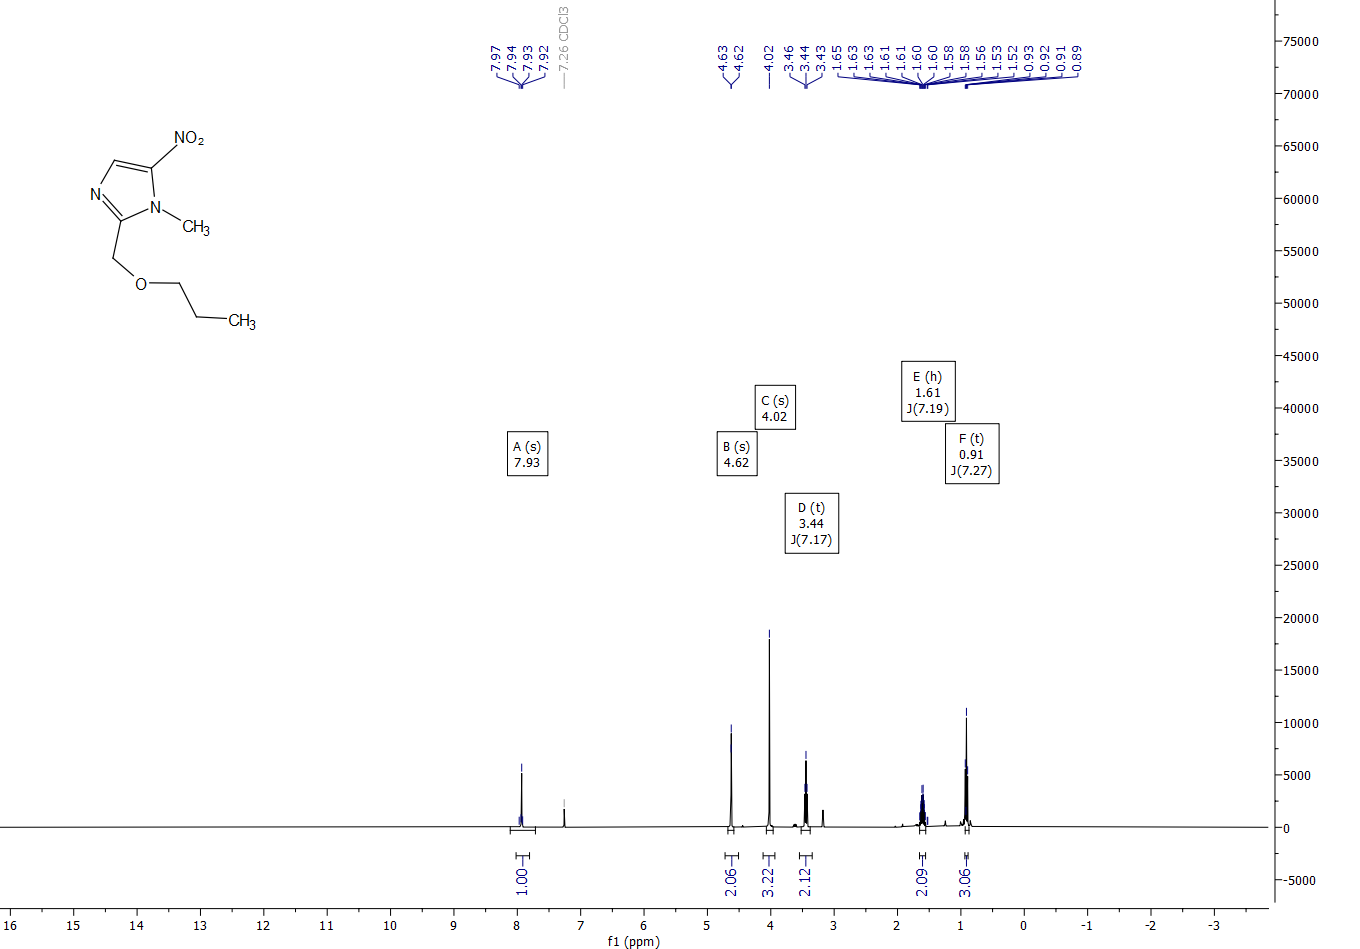

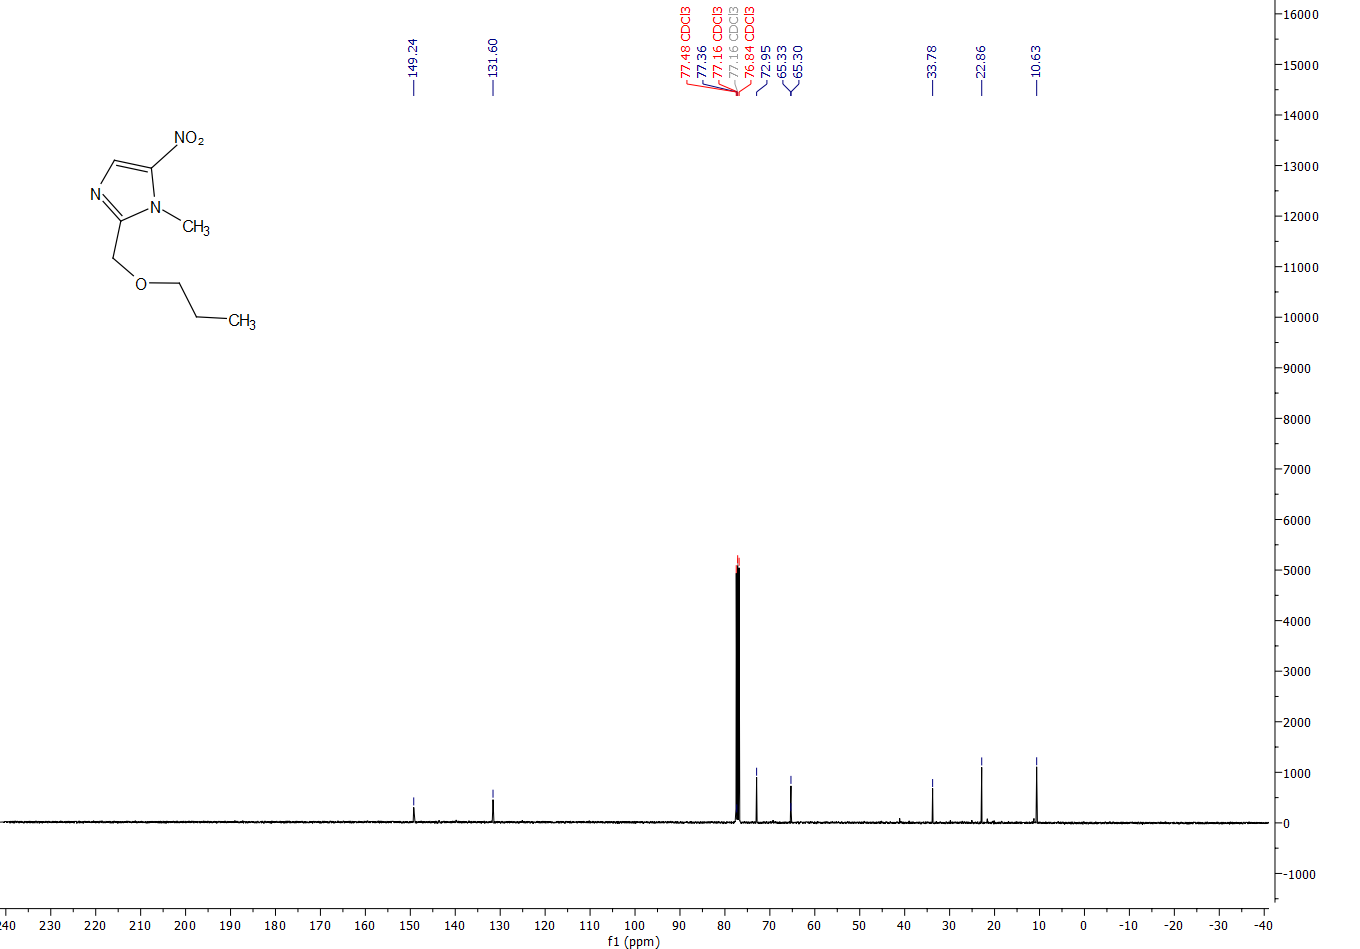
**

**Figure S 37**: 1H and 13C NMR spectra of **MF-06**.

**MF-07**

**
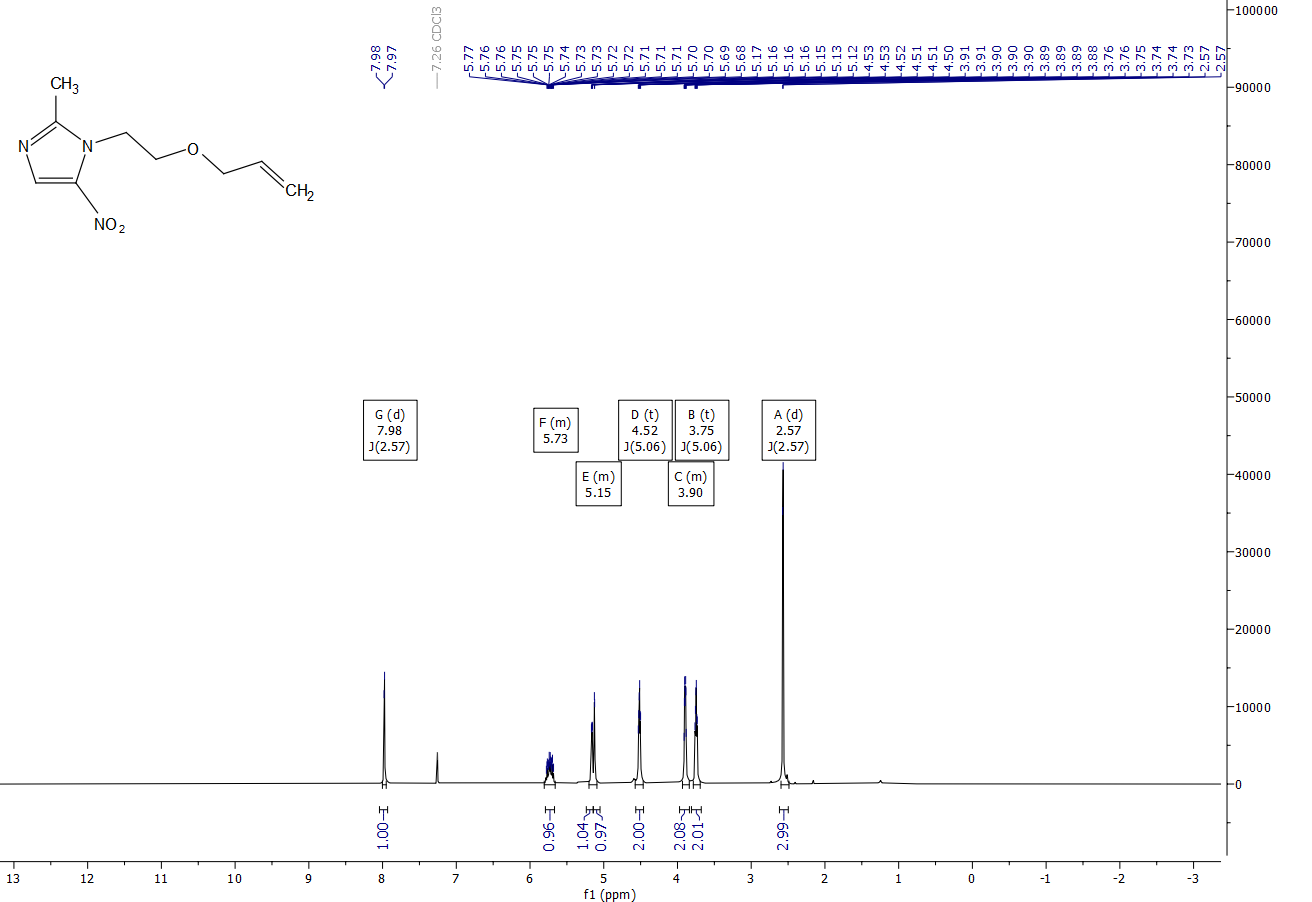

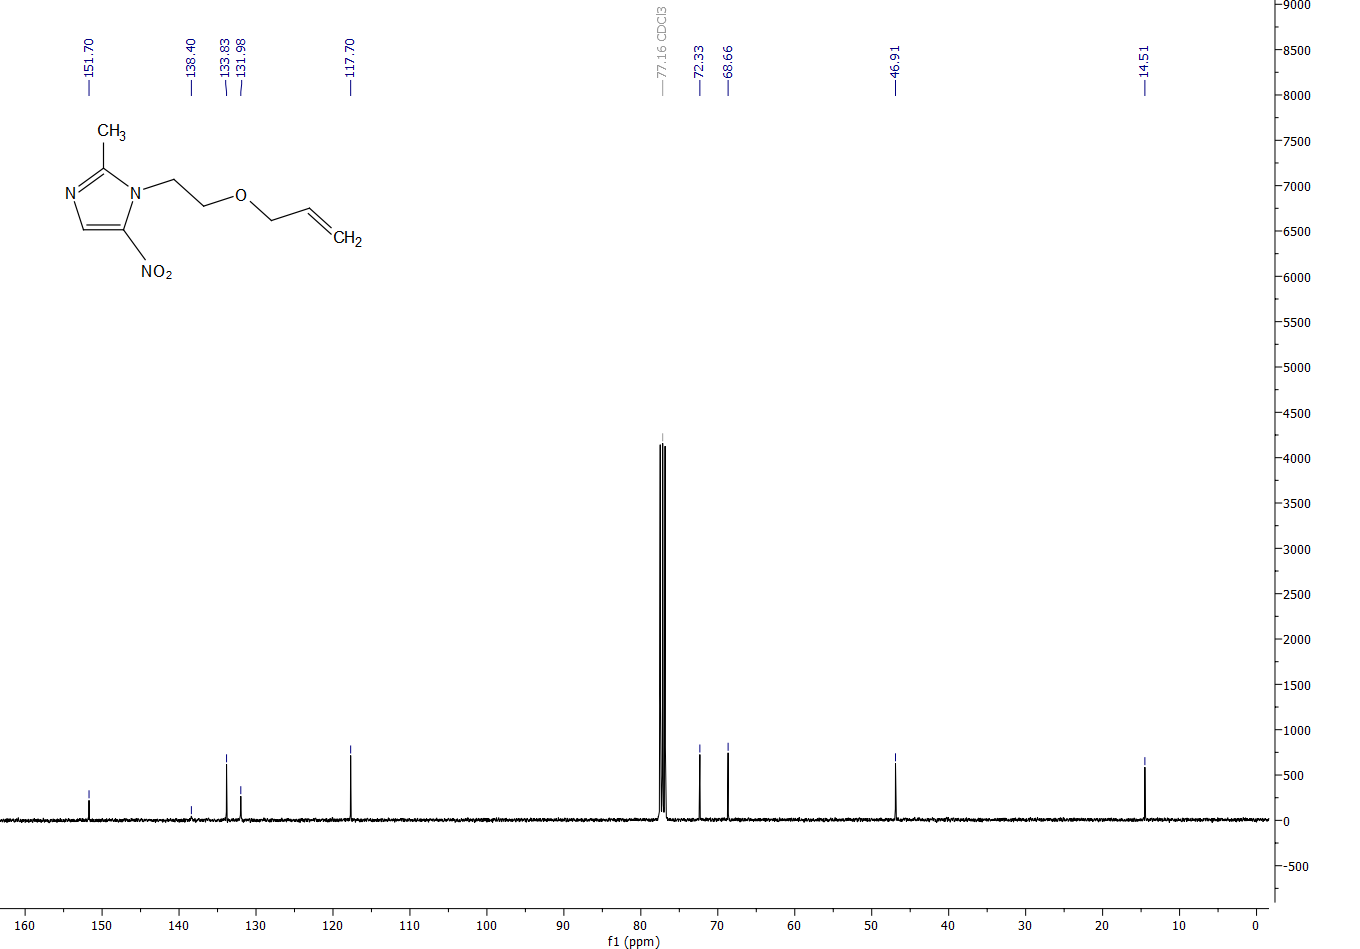
**

**Figure S 38**: 1H and 13C NMR spectra of **MF-07**.

**MF-08**

**
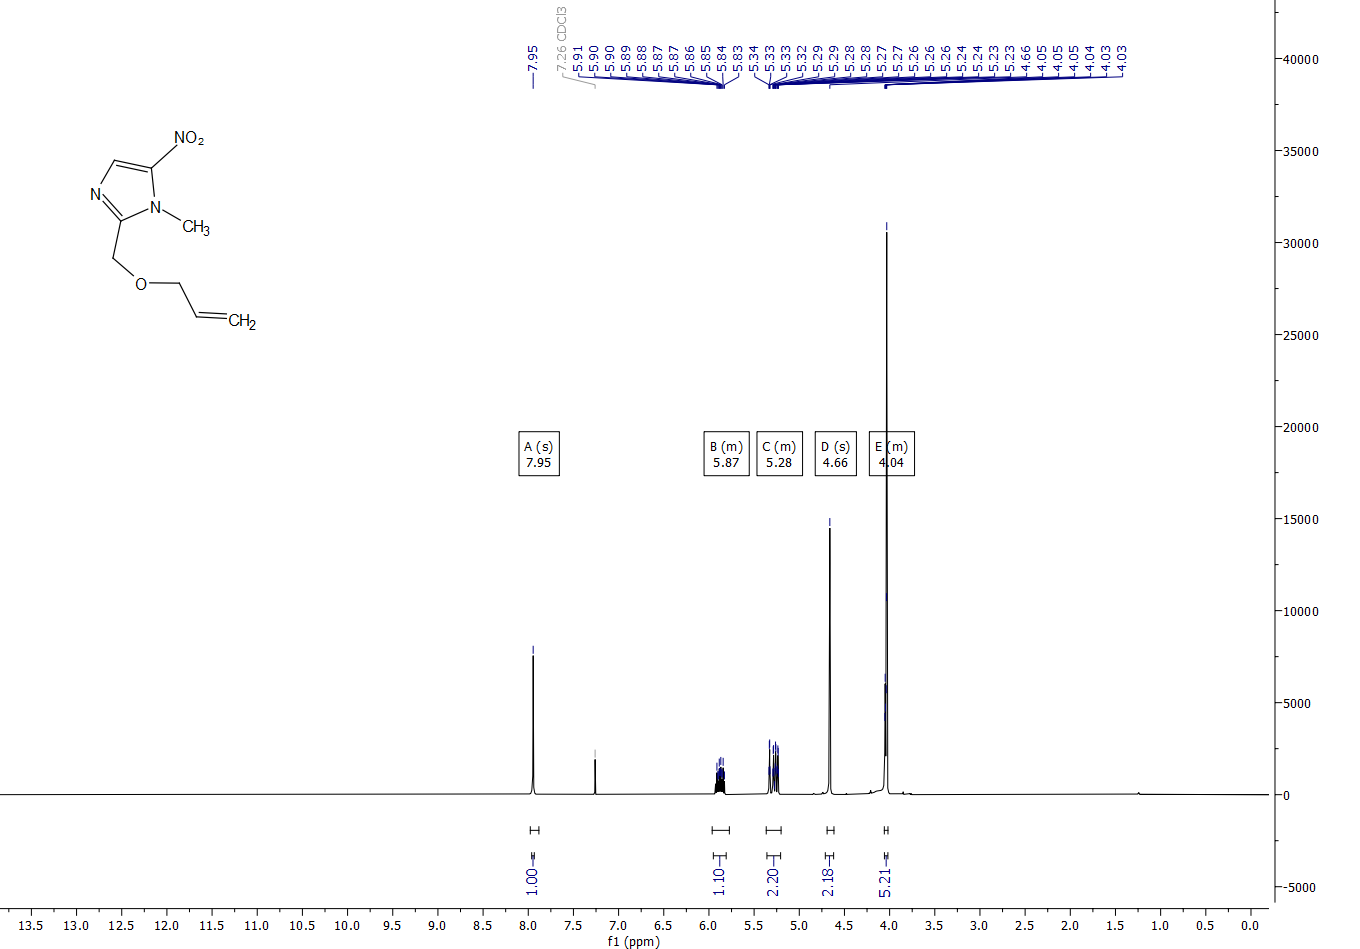

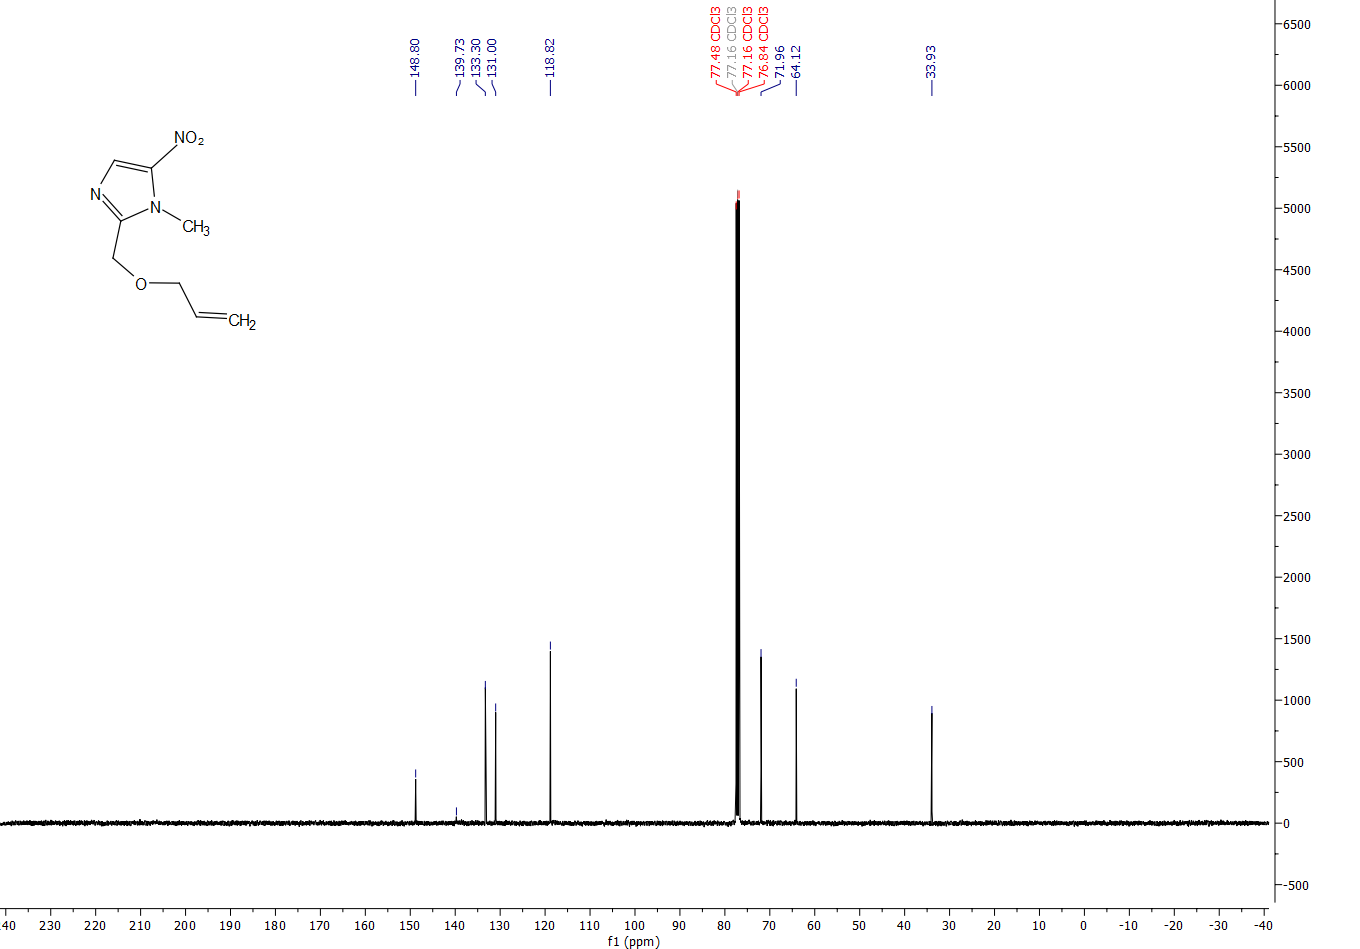
**

**Figure S 39**: 1H and 13C NMR spectra of **MF-08**.

**MF-09**

**
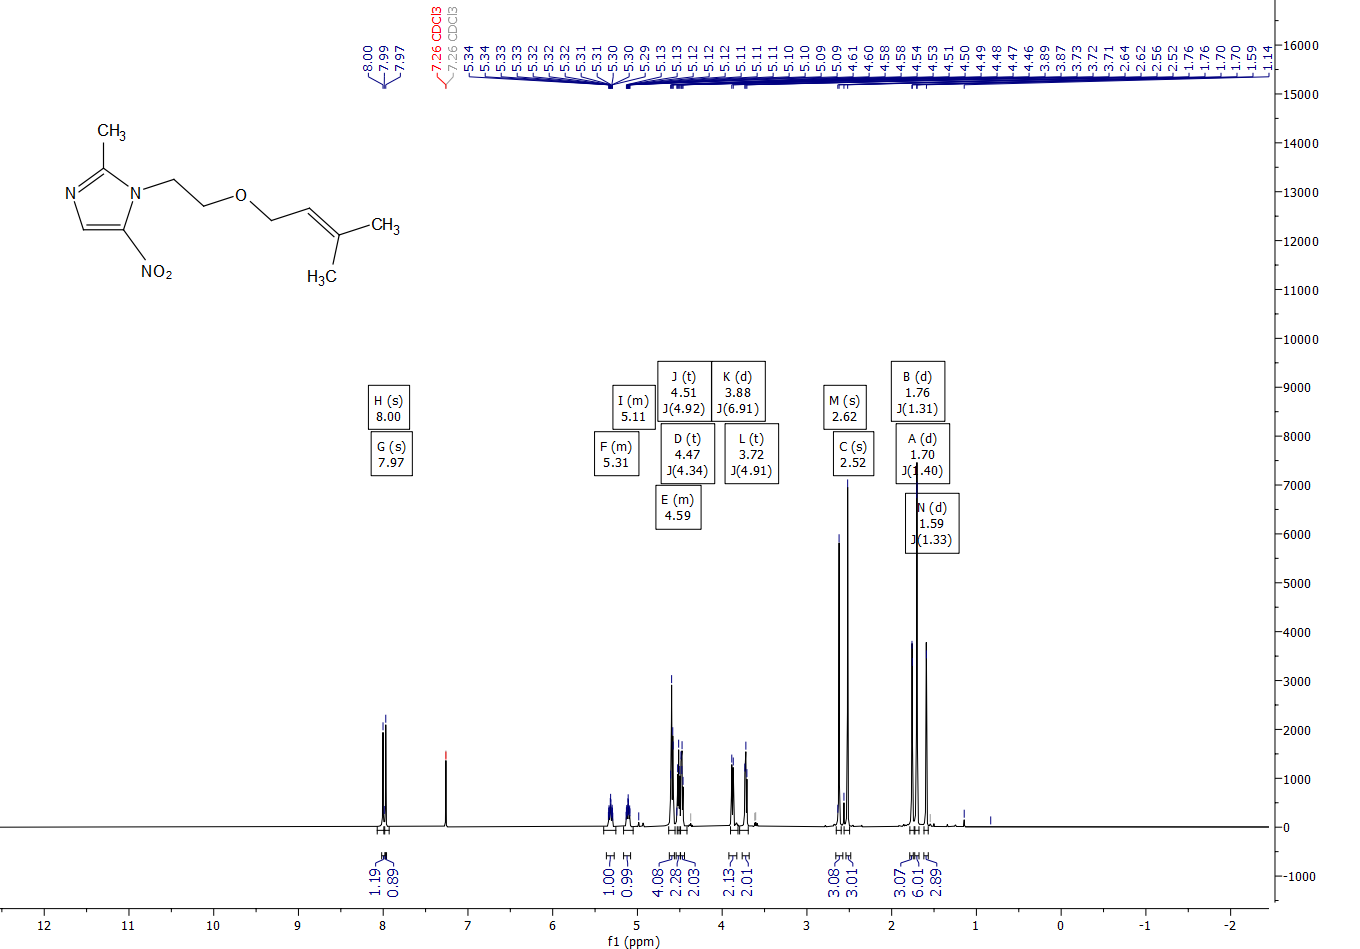

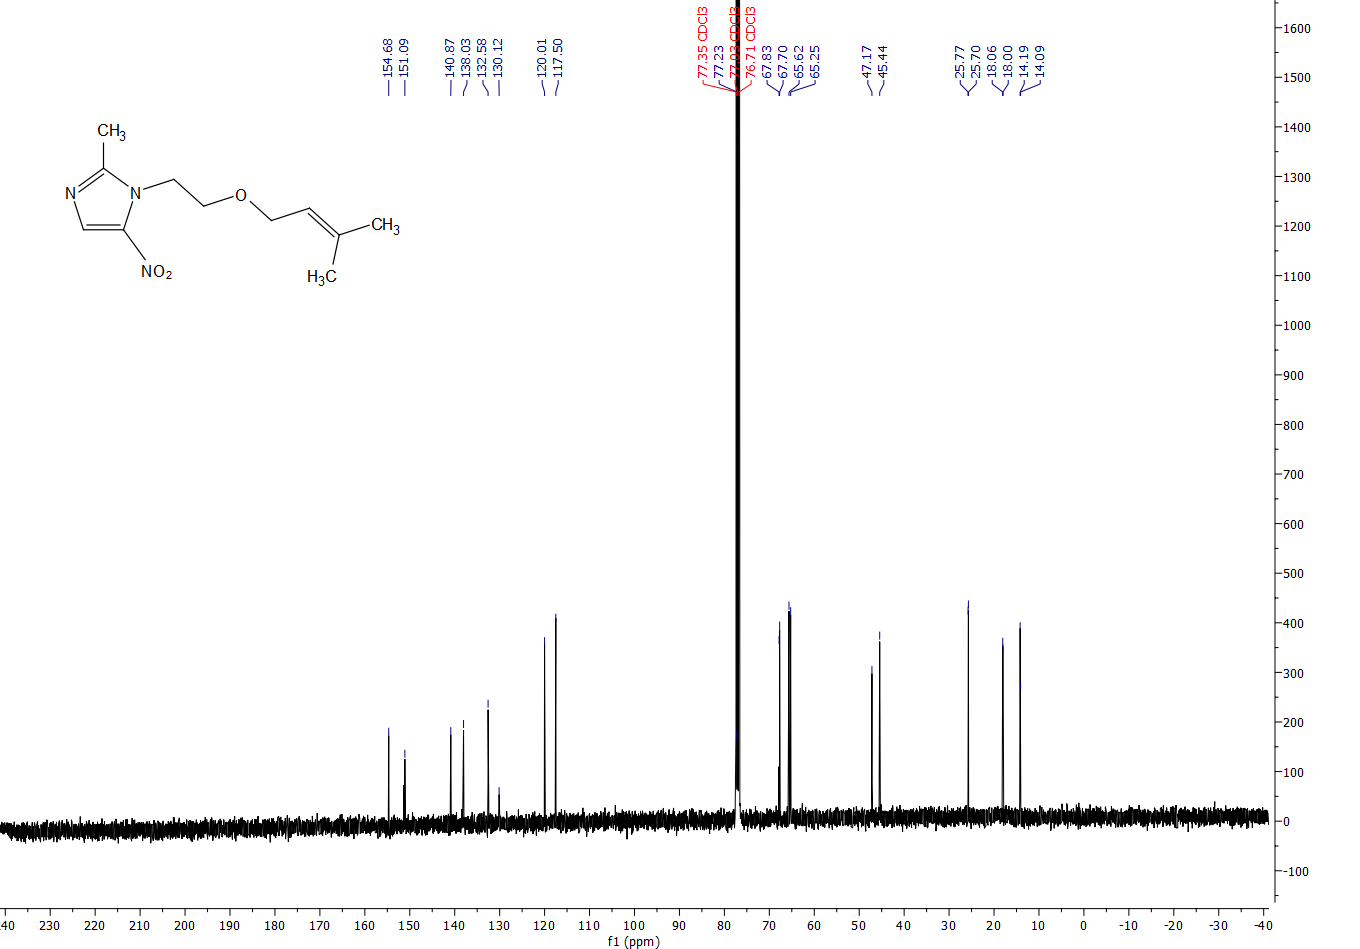
**

**Figure S 40**: 1H and 13C NMR spectra of **MF-09**.

**MF-10**

**
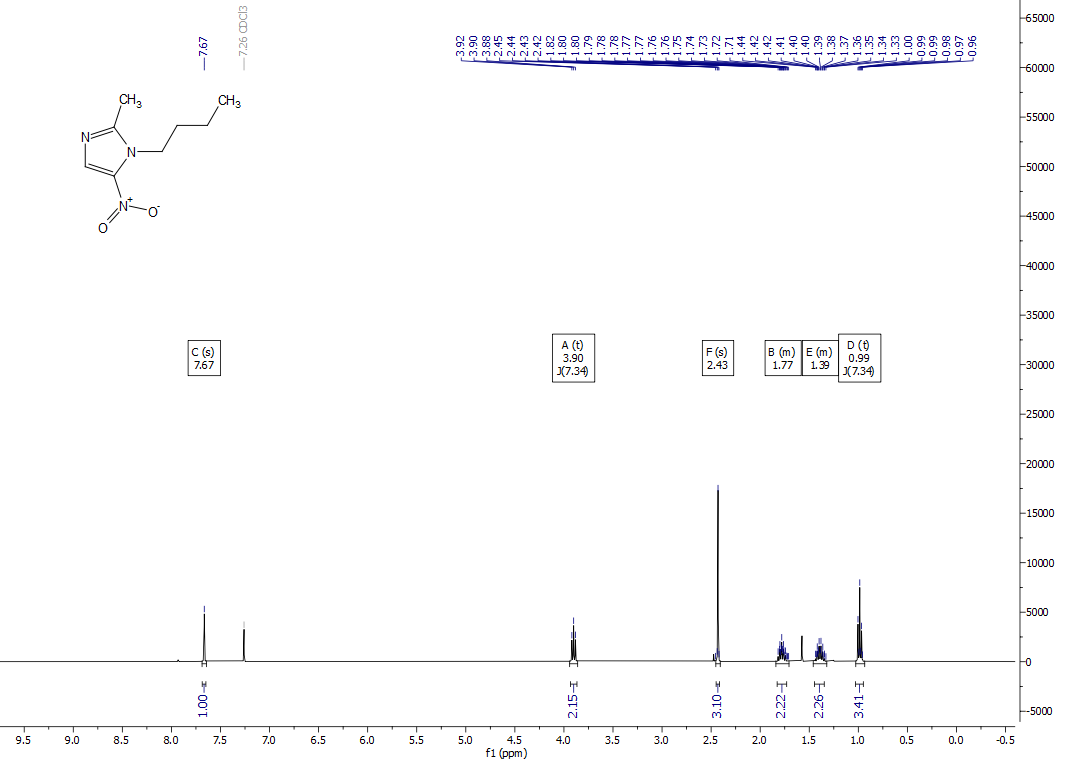

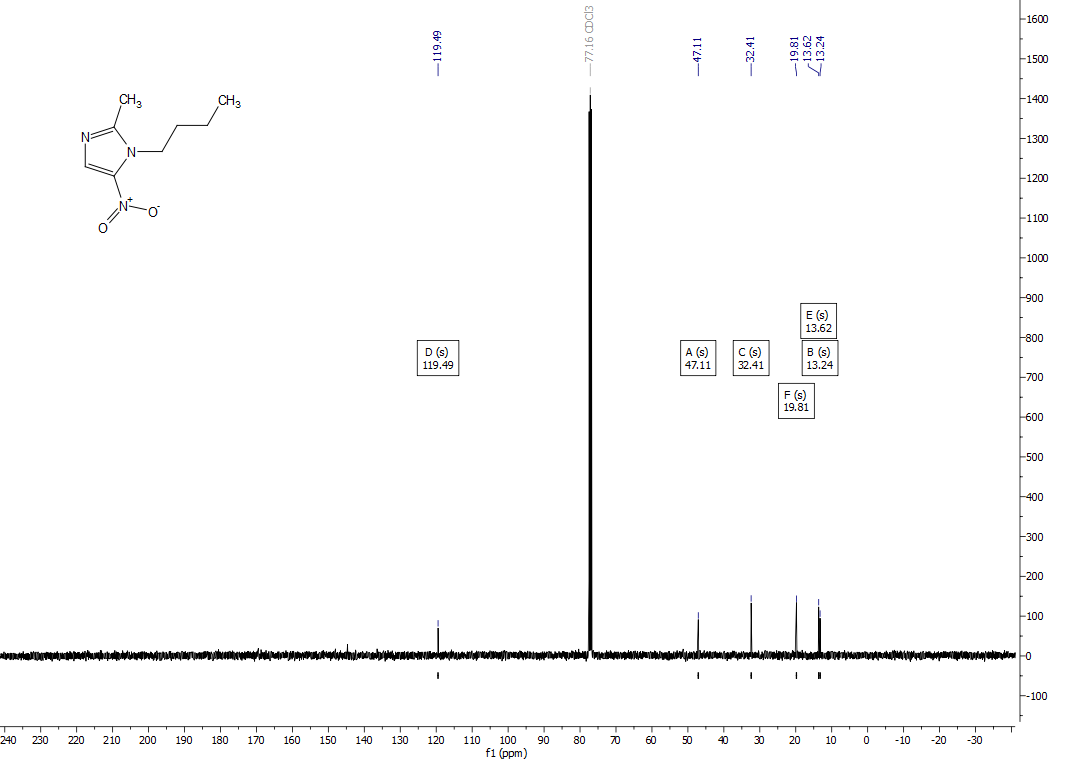
**

**Figure S 41**: 1H and 13C NMR spectra of **MF-10**.

**MF-11**

**
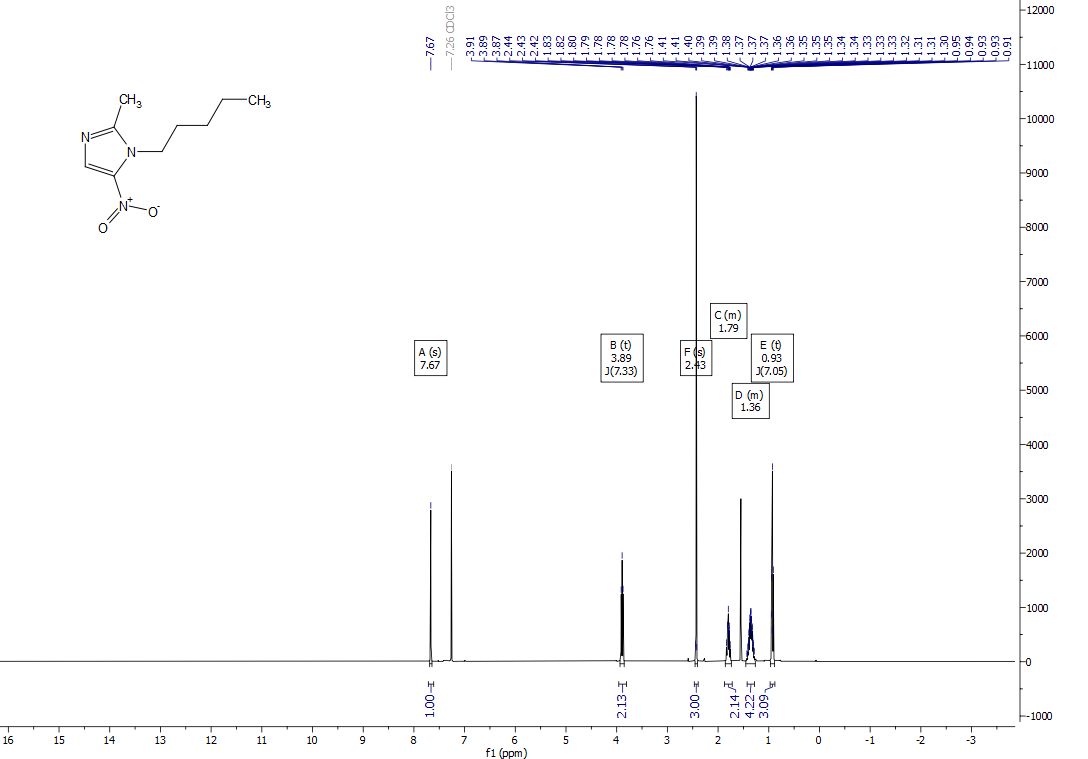

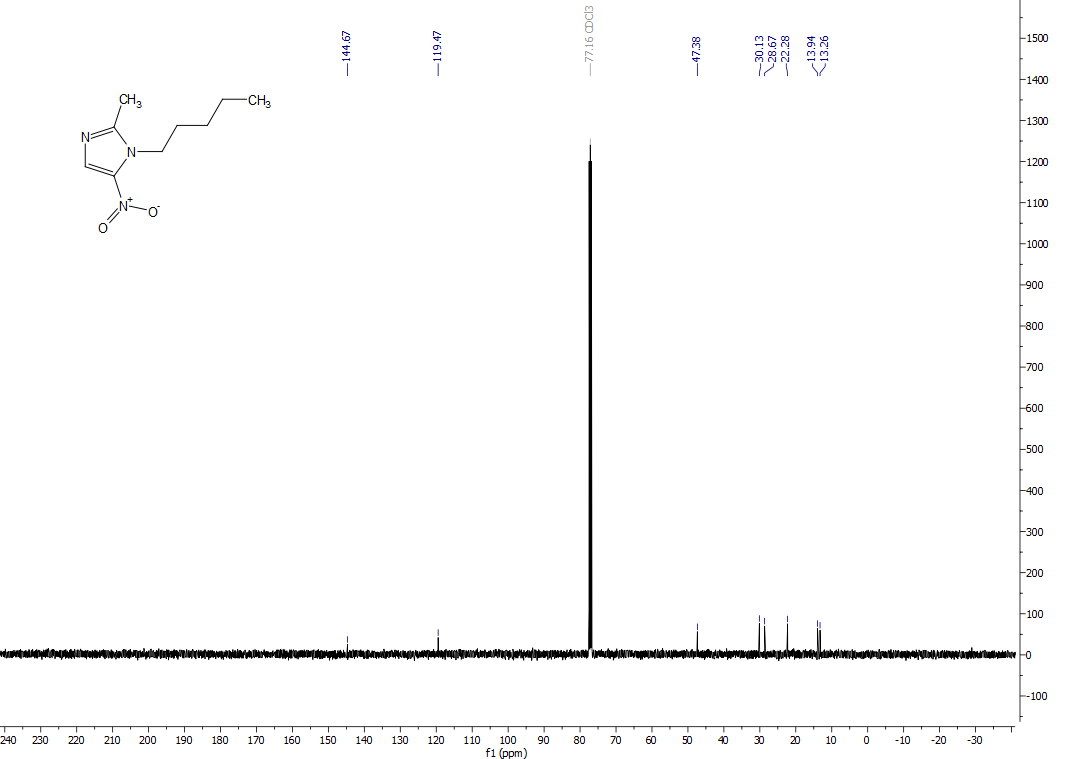
**

**Figure S 42**: 1H and 13C NMR spectra of **MF-11**.

References

1 Schneider, C. A., Rasband, W. S. & Eliceiri, K. W. NIH Image to ImageJ: 25 years of image analysis. *Nature methods* **9**, 671–675 (2012).

2 Gabrielsen, M. *et al.* Expression, purification, crystallization and initial X-ray diffraction analysis of thiol peroxidase from Yersinia pseudotuberculosis. *Acta Crystallographica Section F: Structural Biology and Crystallization Communications* **66**, 1606–1609 (2010).

3 Choi, J., Choi, S., Cha, M.-K., Kim, I.-H. & Shin, W. Crystallization and preliminary X-ray analysis of Escherichia coli p20, a novel thiol peroxidase. *Acta Crystallographica Section D: Biological Crystallography* **59**, 1064–1066 (2003).

4 Holm, L. Dali server: structural unification of protein families. *Nucleic Acids Research* **50**, W210–W215 (2022). <https://doi.org/10.1093/nar/gkac387>

5 Yang, L.-X. & Hofer, K. Synthesis of 2-Methyl-5-nitroimidazol-1-yl-acetaldehyde. *Synthetic communications* **26**, 3653–3657 (1996).

6 Ratsch, F. *et al.* Total Synthesis of α‐Tocopherol through Enantioselective Iridium‐Catalyzed Fragmentation of a Spiro‐Cyclobutanol Intermediate. *Chemistry–A European Journal* **25**, 4941–4945 (2019).

7 Jamshidi, H. *et al.* Synthesis and biological activity profile of novel triazole/quinoline hybrids. *Chemical Biology & Drug Design* **100**, 935–946 (2022).

8 Bejot, R., Carroll, L., Bhakoo, K., Declerck, J. & Gouverneur, V. A fluorous and click approach for screening potential PET probes: evaluation of potential hypoxia biomarkers. *Bioorganic & medicinal chemistry* **20**, 324–329 (2012).

9 Smith, M. A. & Edwards, D. I. Redox potential and oxygen concentration as factors in the susceptibility of Helicobacter pylori to nitroheterocyclic drugs. *Journal of Antimicrobial Chemotherapy* **35**, 751–764 (1995).

10 Debowski, A. W., Verbrugghe, P., Sehnal, M., Marshall, B. J. & Benghezal, M. Development of a tetracycline-inducible gene expression system for the study of Helicobacter pylori pathogenesis. *Applied and environmental microbiology* **79**, 7351–7359 (2013).

11 Dailidiene, D., Dailide, G., Kersulyte, D. & Berg, D. E. Contraselectable streptomycin susceptibility determinant for genetic manipulation and analysis of Helicobacter pylori. *Applied and environmental microbiology* **72**, 5908–5914 (2006).

12 Cox, J. & Mann, M. MaxQuant enables high peptide identification rates, individualized ppb-range mass accuracies and proteome-wide protein quantification. *Nature biotechnology* **26**, 1367–1372 (2008).

13 Cox, J. *et al.* Andromeda: A Peptide Search Engine Integrated into the MaxQuant Environment. *Journal of Proteome Research* **10**, 1794–1805 (2011). <https://doi.org/10.1021/pr101065j>

14 Tyanova, S. *et al.* The Perseus computational platform for comprehensive analysis of (prote) omics data. *Nature methods* **13**, 731–740 (2016).

15 Consortium, T. U. UniProt: the Universal Protein Knowledgebase in 2023. *Nucleic Acids Research* **51**, D523–D531 (2022). <https://doi.org/10.1093/nar/gkac1052>

16 Zanon, P. R., Lewald, L. & Hacker, S. M. Isotopically labeled desthiobiotin azide (isoDTB) tags enable global profiling of the bacterial cysteinome. *Angewandte Chemie* **132**, 2851–2858 (2020).

17 Zanon, P. R. *et al.* Profiling the proteome-wide selectivity of diverse electrophiles. (2021).

18 Kessner, D., Chambers, M., Burke, R., Agus, D. & Mallick, P. ProteoWizard: open source software for rapid proteomics tools development. *Bioinformatics* **24**, 2534–2536 (2008).

19 Kong, A. T., Leprevost, F. V., Avtonomov, D. M., Mellacheruvu, D. & Nesvizhskii, A. I. MSFragger: ultrafast and comprehensive peptide identification in mass spectrometry–based proteomics. *Nature methods* **14**, 513–520 (2017).

20 Yu, F. *et al.* Identification of modified peptides using localization-aware open search. *Nature communications* **11**, 4065 (2020).

21 Chang, H.-Y. *et al.* Crystal-C: a computational tool for refinement of open search results. *Journal of proteome research* **19**, 2511–2515 (2020).

22 Geiszler, D. J. *et al.* PTM-Shepherd: analysis and summarization of post-translational and chemical modifications from open search results. *Molecular & Cellular Proteomics* **20** (2021).

23 Teo, G. C., Polasky, D. A., Yu, F. & Nesvizhskii, A. I. Fast deisotoping algorithm and its implementation in the MSFragger search engine. *Journal of proteome research* **20**, 498–505 (2020).

24 da Veiga Leprevost, F. *et al.* Philosopher: a versatile toolkit for shotgun proteomics data analysis. *Nature methods* **17**, 869–870 (2020).

25 Yu, F., Haynes, S. E. & Nesvizhskii, A. I. IonQuant enables accurate and sensitive label-free quantification with FDR-controlled match-between-runs. *Molecular & Cellular Proteomics* **20** (2021).

26 Wright, M. H. *et al.* Validation of N-myristoyltransferase as an antimalarial drug target using an integrated chemical biology approach. *Nature chemistry* **6**, 112–121 (2014).

27 Leitsch, D., Kolarich, D., Wilson, I. B. H., Altmann, F. & Duchêne, M. Nitroimidazole action in Entamoeba histolytica: a central role for thioredoxin reductase. *PLoS biology* **5**, e211 (2007).

28 Mendoza, J. A., Ignacio, J. L. & Buckley, C. M. The Hsp60 protein of Helicobacter pylori exhibits chaperone and ATPase activities at elevated temperatures. *BioChem* **1**, 19–25 (2021).

29 Nguyen, H. T. M., Nam, K.-H., Saleem, Y. & Kim, K.-S. Characterization of Helicobacter pylori adhesin thiol peroxidase (HP0390) purified from Escherichia coli. *Journal of biosciences* **35**, 241–248 (2010).

30 Kabsch, W. xds. *Acta Crystallographica Section D: Biological Crystallography* **66**, 125–132 (2010).

31 McCoy, A. J. *et al.* Phaser crystallographic software. *Journal of applied crystallography* **40**, 658–674 (2007).

32 Jumper, J. *et al.* Highly accurate protein structure prediction with AlphaFold. *Nature* **596**, 583–589 (2021).

33 Emsley, P., Lohkamp, B., Scott, W. G. & Cowtan, K. Features and development of Coot. *Acta Crystallographica Section D: Biological Crystallography* **66**, 486–501 (2010).

34 Perrakis, A., Sixma, T., Wilson, K. & Lamzin, V. wARP: improvement and extension of crystallographic phases by weighted averaging of multiple-refined dummy atomic models. *Acta Crystallographica Section D: Biological Crystallography* **53**, 448–455 (1997).

35 Vagin, A. A. *et al.* REFMAC5 dictionary: organization of prior chemical knowledge and guidelines for its use. *Acta Crystallographica Section D: Biological Crystallography* **60**, 2184–2195 (2004).

36 Ling, L. L. *et al.* A new antibiotic kills pathogens without detectable resistance. *Nature* **517**, 455–459 (2015). <https://doi.org/10.1038/nature14098>

37 Hamamoto, H. *et al.* Lysocin E is a new antibiotic that targets menaquinone in the bacterial membrane. *Nat Chem Biol* **11**, 127–133 (2015). <https://doi.org/10.1038/nchembio.1710>

38 Qamra, R., Srinivas, V. & Mande, S. C. Mycobacterium tuberculosis GroEL homologues unusually exist as lower oligomers and retain the ability to suppress aggregation of substrate proteins. *Journal of molecular biology* **342**, 605–617 (2004).

39 Henkel, R. D., VandeBerg, J. L. & Walsh, R. A. A microassay for ATPase. *Analytical biochemistry* **169**, 312–318 (1988).

40 Rho, B.-S. *et al.* Functional and Structural Characterization of a Thiol Peroxidase from Mycobacterium tuberculosis. *Journal of Molecular Biology* **361**, 850–863 (2006). <https://doi.org/https://doi.org/10.1016/j.jmb.2006.05.076>

41 Rohdewald, P. & Beil, W. In vitro inhibition of helicobacter pylori growth and adherence to gastric mucosal cells by Pycnogenol®. *Phytotherapy Research: An International Journal Devoted to Pharmacological and Toxicological Evaluation of Natural Product Derivatives* **22**, 685–688 (2008).

42 Huang, Y., Wang, Q.-l., Cheng, D.-d., Xu, W.-t. & Lu, N.-h. Adhesion and invasion of gastric mucosa epithelial cells by Helicobacter pylori. *Frontiers in cellular and infection microbiology* **6**, 159 (2016).

43 Lozniewski, A. *et al.* Influence of Lewis antigen expression by Helicobacter pylori on bacterial internalization by gastric epithelial cells. *Infection and immunity* **71**, 2902–2906 (2003).

44 Mała, P. *et al.* Discovery of N-β-l-Fucosyl Amides as High-Affinity Ligands for the Pseudomonas aeruginosa Lectin LecB. *Journal of Medicinal Chemistry* **65**, 14180–14200 (2022). <https://doi.org/10.1021/acs.jmedchem.2c01373>

45 Zhang, Y., Huo, M., Zhou, J. & Xie, S. PKSolver: An add-in program for pharmacokinetic and pharmacodynamic data analysis in Microsoft Excel. *Computer methods and programs in biomedicine* **99**, 306–314 (2010).
